# Supplementary material for: RNA-Chrom: a manually curated analytical database of RNA–chromatin interactome
Source: Database (Oxford). 2023 Apr 24;2023:baad025. doi: 10.1093/database/baad025 (PMC10205464; doi:10.1093/database/baad025)
Supplement: baad025_Supp [file baad025_supp.zip]

Archive with 5 entries (5 files):
- baad025_Supp/RNA-Chrom-supplementary-materials.pdf
- baad025_Supp/Supplementary-table-1.xlsx
- baad025_Supp/Supplementary-table-2.xlsx
- baad025_Supp/Supplementary-table-3.xlsx
- baad025_Supp/Supplementary-table-4.xlsx
