# Supplementary material for: RNA-Chrom: a manually curated analytical database of RNA–chromatin interactome
Source: Database (Oxford). 2023 Apr 24;2023:baad025. doi: 10.1093/database/baad025 (PMC10205464; doi:10.1093/database/baad025)
Supplement: baad025_Supp [file baad025_supp.zip › baad025_Supp/Supplementary-table-1.xlsx]

## Sheet: Table 1
Supplementary Table 1. Data processing statistics.
Exp.ID — unique identifier of the corresponding RNA-chromatin interaction experiment in the database.
Data type — "one-to-all" or "all-to-all".
Data set type — "treatment" or "input".
Method (RNA) — name of the experimental protocol used to obtain the data (RNA name used in the article).
GSE — the NCBI GEO accession number for RNA-chromatin data reported in this paper.
GSM — samples.
Raw data — the initial number of reads in the data set.
Remove duplicates — number of reads left after the removal of possible PCR duplicates.
Trimmomatic — number of reads left after filtering out low-quality reads.
Mapping — number of reads left after unique mapping of reads on the genome.
CIGAR filter — number of contacts whose RNA-parts passed the appropriate filtering by the CIGAR field.
BlackList — number of contacts whose DNA-parts do not intersect with the BlackList annotation.
Annotation of RNA-parts of contacts — number of contacts for which a match was established between RNA-parts and genes from our general gene annotation.
Singletons — number of contacts for which no correspondence was established between RNA-parts and genes from our general gene annotation.
Processing protocol — "default" or for some GSMs, due to their low quality, were trimmed with other parameters: SLIDINGWINDOW:5:22 LEADING:22 MINLEN:14
Exp.ID	Data type	Data set type	Method (RNA)	Organism	GSE	GSM	SRR	Raw data	Remove duplicates	Trimmomatic	Mapping	CIGAR filter	BlackList	Annotation of RNA-parts of contacts	Singletons	Processing protocol
1	All-to-all	treatment	HFF_iMARGI	H. sapiens	GSE122690	GSM3478206	SRR8206680	355231477	108657853	94855274	6202175	6145192	6123192	3834489	2288703
2	All-to-all	treatment	HEK_iMARGI	H. sapiens	GSE122690	GSM3478205	SRR8206679	361159651	183432880	168381290	14964724	14856129	14830964	8042217	6788747
3	All-to-all	treatment	iMARGI	H. sapiens	GSE135357	GSM4006840	SRR9900120	362067266	121865555	105281669	20864834	20679294	20645363	14772175	5873188
3	All-to-all	treatment	iMARGI	H. sapiens	GSE135357	GSM4729222	SRR12462453	312580340	45694223	36808500	3212904	3183691	3176485	2790385	386100
4	All-to-all	treatment	iMARGI	H. sapiens	GSE135357	GSM4006842	SRR9900122	265410422	154476853	124962399	13657426	13532217	13512314	10556537	2955777
4	All-to-all	treatment	iMARGI	H. sapiens	GSE135357	GSM4729223	SRR12462454	304927905	53754678	42647748	4018676	3981960	3971923	3507413	464510
5	All-to-all	treatment	iMARGI	H. sapiens	GSE135357	GSM4006841	SRR9900121	324241877	155665927	132676206	13473539	13355633	13331641	9859525	3472116
6	All-to-all	treatment	GRID-seq	M. musculus	GSE82312	GSM2396700	SRR5035944, SRR5035945	157029755	143342816	98307902	39260163	39260163	39180118	35177573	4002545
6	All-to-all	treatment	GRID-seq	M. musculus	GSE82312	GSM2396701	SRR5035946, SRR5035947	113615076	105976825	76101695	30436036	30436036	30372870	27272863	3100007
7	All-to-all	treatment	GRID-seq	H. sapiens	GSE82312	GSM2188868	SRR3633288, SRR3633289	135005529	126371781	80996532	21013450	21013450	20952876	19100645	1852231
7	All-to-all	treatment	GRID-seq	H. sapiens	GSE82312	GSM2188869	SRR3633290, SRR3633291	149560162	138614906	87149088	22150339	22150339	22086518	20128186	1958332
8	All-to-all	treatment	GRID-seq	H. sapiens	GSE82312	GSM2188866	SRR3633284, SRR3633285	168003148	129780117	92681385	34820044	34820044	34690046	32083012	2607034
8	All-to-all	treatment	GRID-seq	H. sapiens	GSE82312	GSM2188867	SRR3633286, SRR3633287	144824313	115288028	92483645	35074390	35074390	34946434	32349998	2596436
9	All-to-all	treatment	Red-C	H. sapiens	GSE136141	GSM4041589	SRR10010324	9379672	7787520	3272936	733090	730671	728671	698834	29837
9	All-to-all	treatment	Red-C	H. sapiens	GSE136141	GSM4041588	SRR10010323	320137494	84787240	22277490	4235097	4214417	4202205	4030972	171233
9	All-to-all	treatment	Red-C	H. sapiens	GSE136141	GSM4041590	SRR10010325	18633084	15044514	4766355	689838	688400	686599	656198	30401
10	All-to-all	treatment	Red-C	H. sapiens	GSE136141	GSM4041593	SRR10010328	15544096	14906215	5256366	1570884	1570884	1567776	1521839	45937
10	All-to-all	treatment	Red-C	H. sapiens	GSE136141	GSM4041591	SRR10010326	122496066	104002630	53241174	18614413	18599223	18561432	18001795	559637
10	All-to-all	treatment	Red-C	H. sapiens	GSE136141	GSM4041595	SRR10010330	217194632	184373335	83633460	25143196	25040126	24989597	24084628	904969
11	All-to-all	treatment	RADICL-seq	M. musculus	GSE132192	GSM3852782,GSM3852783	SRR9201821, SRR9201822	109641300	50136462	48723388	16963150	16963141	16917403	14370904	2546499
11	All-to-all	treatment	RADICL-seq	M. musculus	GSE132192	GSM3852784,GSM3852785	SRR9201823, SRR9201824	177141047	70245458	65225802	19573478	19573460	19505871	16096897	3408974
11	All-to-all	treatment	RADICL-seq	M. musculus	GSE132192	GSM3852786,GSM3852787	SRR9201825, SRR9201826	116696414	66054459	64079268	18839878	18839858	18755467	15510140	3245327
12	All-to-all	treatment	RADICL-seq	M. musculus	GSE132192	GSM3852772,GSM3852773	SRR9201811, SRR9201812	80840332	62460514	61304559	12895378	12895364	12853733	11196929	1656804
12	All-to-all	treatment	RADICL-seq	M. musculus	GSE132192	GSM3852774,GSM3852775	SRR9201813, SRR9201814	46391552	36407286	35360326	7445218	7445212	7420274	6476269	944005
13	All-to-all	treatment	RADICL-seq	M. musculus	GSE132192	GSM3852788,GSM3852789	SRR9201827, SRR9201828	183431185	126416306	116464738	30915062	30915047	30634755	24907048	5727707
13	All-to-all	treatment	RADICL-seq	M. musculus	GSE132192	GSM3852790,GSM3852791	SRR9201829, SRR9201830	83199412	67942573	66739775	26385454	26385440	26162956	20830159	5332797
14	All-to-all	treatment	RADICL-seq	M. musculus	GSE132192	GSM3852760,GSM3852761	SRR9201799, SRR9201800	141369583	89981407	86664774	22833147	22833142	22709894	20538914	2170980
14	All-to-all	treatment	RADICL-seq	M. musculus	GSE132192	GSM3852762,GSM3852763	SRR9201801, SRR9201802	120467724	114071270	111511842	14244012	14244000	14171055	11804156	2366899
14	All-to-all	treatment	RADICL-seq	M. musculus	GSE132192	GSM3852764,GSM3852765	SRR9201803, SRR9201804	103775249	91232071	86231499	23636981	23636978	23530940	20596642	2934298
15	All-to-all	treatment	RADICL-seq	M. musculus	GSE132192	GSM3852766,GSM3852767	SRR9201805, SRR9201806	141797636	72666229	69831347	17580762	17580762	17513892	15447608	2066284
15	All-to-all	treatment	RADICL-seq	M. musculus	GSE132192	GSM3852768,GSM3852769	SRR9201807, SRR9201808	107359872	93657938	91556003	19655744	19655744	19541165	16676470	2864695
15	All-to-all	treatment	RADICL-seq	M. musculus	GSE132192	GSM3852770,GSM3852771	SRR9201809, SRR9201810	97641969	75842542	73975111	19609144	19609144	19518875	15260088	4258787
16	All-to-all	treatment	RADICL-seq	M. musculus	GSE132192	GSM3852776,GSM3852777	SRR9201815, SRR9201816	90562587	71931401	69840989	10564426	10309659	10174745	8072329	2102416
16	All-to-all	treatment	RADICL-seq	M. musculus	GSE132192	GSM3852778,GSM3852779	SRR9201817, SRR9201818	94824870	75401318	73490194	10957639	10957632	10813507	8550659	2262848
16	All-to-all	treatment	RADICL-seq	M. musculus	GSE132192	GSM3852780,GSM3852781	SRR9201819, SRR9201820	101197947	88625058	82582640	19688147	19688143	19364956	17352740	2012216
30	One-to-all	input	ChIRP (SLEAR)	H. sapiens	GSE104480	GSM2801158	SRR6124052	23555626	23474521	22708503	19398476	None	None	None	None
30	One-to-all	input	ChIRP (SLEAR)	H. sapiens	GSE104480	GSM2801162	SRR6124056	20034450	19964853	19315800	16556094	None	None	None	None
30	One-to-all	input	ChIRP (SLEAR)	H. sapiens	GSE104480	GSM2801166	SRR6124060	16288974	16257084	13399669	11505402	None	None	None	None
30	One-to-all	treatment	ChIRP (SLEAR)	H. sapiens	GSE104480	GSM2801160	SRR6124054	16357581	16161066	14537825	11341387	None	11 227 271	None	None
30	One-to-all	treatment	ChIRP (SLEAR)	H. sapiens	GSE104480	GSM2801161	SRR6124055	18975145	18107167	16950317	14048833	None	13 981 968	None	None
30	One-to-all	treatment	ChIRP (SLEAR)	H. sapiens	GSE104480	GSM2801164	SRR6124058	23499301	21579194	19818751	14839582	None	14 650 728	None	None
30	One-to-all	treatment	ChIRP (SLEAR)	H. sapiens	GSE104480	GSM2801165	SRR6124059	24383351	23231639	21331696	16150690	None	16 060 056	None	None
30	One-to-all	treatment	ChIRP (SLEAR)	H. sapiens	GSE104480	GSM2801168	SRR6124062	10629729	10512098	8216847	7120521	None	7 030 972	None	None
30	One-to-all	treatment	ChIRP (SLEAR)	H. sapiens	GSE104480	GSM2801169	SRR6124063	10223132	10127528	8015294	6998692	None	6 970 792	None	None
31	One-to-all	input	ChIRP (lnc-Nr2f1)	M. musculus	GSE115079	GSM3164836	SRR7233691	30960325	28824497	25125318	19452998	None	None	None	None
31	One-to-all	treatment	ChIRP (lnc-Nr2f1)	M. musculus	GSE115079	GSM3164832	SRR7233687	37695467	18363560	14289503	9461952	None	9 117 201	None	None
31	One-to-all	treatment	ChIRP (lnc-Nr2f1)	M. musculus	GSE115079	GSM3164833	SRR7233688	53570731	25737308	20659712	14052021	None	13 566 271	None	None
31	One-to-all	treatment	ChIRP (lnc-Nr2f1)	M. musculus	GSE115079	GSM3164828	SRR7233683	42780561	13197624	11600290	8814679	None	8 627 720	None	None
31	One-to-all	treatment	ChIRP (lnc-Nr2f1)	M. musculus	GSE115079	GSM3164829	SRR7233684	44046760	17247378	15399937	11891734	None	11 640 564	None	None
32	One-to-all	input	ChIRP (lincRNA-EPS)	M. musculus	GSE115524	GSM3181443	SRR7281310	89149505	81372725	70566147	52849127	None	None	None	None
32	One-to-all	input	ChIRP (lincRNA-EPS)	M. musculus	GSE115524	GSM3181444	SRR7281311	83856852	78077898	65765759	49747704	None	None	None	None
32	One-to-all	treatment	ChIRP (lincRNA-EPS)	M. musculus	GSE115524	GSM3181441	SRR7281308	99485530	82543997	77128489	41703809	None	41 647 705	None	None
32	One-to-all	treatment	ChIRP (lincRNA-EPS)	M. musculus	GSE115524	GSM3181442	SRR7281309	100170476	68057005	60351623	35153634	None	35 082 331	None	None
33	One-to-all	input	ChIRP (lnc-Nr2f1)	M. musculus	GSE119006	GSM3717638	SRR8881908	23177081	21922555	20279328	15585074	None	None	None	None
33	One-to-all	treatment	ChIRP (lnc-Nr2f1)	M. musculus	GSE119006	GSM3717639	SRR8881909	39110927	12551013	11017795	7699323	None	7 547 438	None	None
33	One-to-all	treatment	ChIRP (lnc-Nr2f1)	M. musculus	GSE119006	GSM3717640	SRR8881910	41635836	11478017	9991820	7060698	None	6 940 797	None	None
34	One-to-all	input	CHIRT (TERRA)	M. musculus	GSE121759	GSM3445730	SRR8108607	262758538	231968642	200111997	175317308	None	None	None	None
34	One-to-all	treatment	CHIRT (TERRA)	M. musculus	GSE121759	GSM3445731	SRR8108608	106172159	93008191	40736901	18163269	None	18 126 531	None	None	quality score has been lowered to 22
35	One-to-all	input	ChIRP (L1, Malat1)	M. musculus	GSE125766	GSM3581641	SRR8496528	21355826	20631032	17437125	6971626	None	None	None	None
35	One-to-all	treatment	ChIRP (L1, Malat1)	M. musculus	GSE125766	GSM3581639	SRR8496526	74924888	70371801	61814146	21294822	None	21 284 962	None	None
36	One-to-all	input	ChIRP (L1, Malat1)	M. musculus	GSE125766	GSM3581641	SRR8496528	21355826	20631032	17437125	6971626	None	None	None	None
36	One-to-all	treatment	ChIRP (L1, Malat1)	M. musculus	GSE125766	GSM3581640	SRR8496527	26944210	25903204	21190810	11021128	None	10 980 367	None	None
37	One-to-all	input	ChIRP (HAND2-AS1)	H. sapiens	GSE126123	GSM3591874	SRR8534556	21321835	21288126	15063041	11295093	None	None	None	None
37	One-to-all	input	ChIRP (HAND2-AS1)	H. sapiens	GSE126123	GSM3591876	SRR8534558	27234799	27163852	24418651	19720583	None	None	None	None
37	One-to-all	input	ChIRP (HAND2-AS1)	H. sapiens	GSE126123	GSM3591878	SRR8534560	22137776	22077065	20764239	14671331	None	None	None	None
37	One-to-all	treatment	ChIRP (HAND2-AS1)	H. sapiens	GSE126123	GSM3591875	SRR8534557	24712565	18628162	11322389	8694135	None	8 612 986	None	None
37	One-to-all	treatment	ChIRP (HAND2-AS1)	H. sapiens	GSE126123	GSM3591877	SRR8534559	35341969	14524593	11196763	9719056	None	9 609 859	None	None
37	One-to-all	treatment	ChIRP (HAND2-AS1)	H. sapiens	GSE126123	GSM3591879	SRR8534561	24437761	7004219	5613940	3499930	None	3 441 641	None	None
37	One-to-all	treatment	ChIRP (HAND2-AS1)	H. sapiens	GSE126123	GSM3591879	SRR8534562	21998288	7273664	5918326	3350993	None	3 327 038	None	None
38	One-to-all	input	ChIRP (IAPEz-int)	M. musculus	GSE126243	GSM4307085	SRR11071217	45751457	39606583	37450829	25440097	None	None	None	None
38	One-to-all	input	ChIRP (IAPEz-int)	M. musculus	GSE126243	GSM4664578	SRR12187231	26240111	24691781	20673094	14423849	None	None	None	None
38	One-to-all	treatment	ChIRP (IAPEz-int)	M. musculus	GSE126243	GSM4307084	SRR11071216	12117204	9574540	8227570	3336533	None	3 304 225	None	None
38	One-to-all	treatment	ChIRP (IAPEz-int)	M. musculus	GSE126243	GSM4664577	SRR12187230	42324467	11175315	9007059	5245188	None	5 191 828	None	None
39	One-to-all	input	CHART (SCIRT)	H. sapiens	GSE136195	GSM4042212	SRR10044359	64312273	59945904	53964257	47198327	None	None	None	None
39	One-to-all	treatment	CHART (SCIRT)	H. sapiens	GSE136195	GSM4042215	SRR10044362	60857691	54117037	48419126	41827969	None	41 594 461	None	None
39	One-to-all	treatment	CHART (SCIRT)	H. sapiens	GSE136195	GSM4042216	SRR10044363	50536633	45193765	40459462	34694049	None	34 490 017	None	None
40	One-to-all	input	RAP-seq (Xist)	M. musculus	GSE46918	GSM1141184	SRR850637	19817683	19250562	13284624	9882020	None	None	None	None
40	One-to-all	treatment	RAP (Xist)	M. musculus	GSE137305	GSM4520649	SRR11725196	4000000	3382365	2398613	1227681	None	1 215 095	None	None
41	One-to-all	input	RAP-seq (Xist)	M. musculus	GSE46918	GSM1141184	SRR850637	19817683	19250562	13284624	9882020	None	None	None	None
41	One-to-all	treatment	RAP (Xist)	M. musculus	GSE137305	GSM4520650	SRR11725197	4000000	3205984	2214834	651226	None	643 496	None	None
42	One-to-all	input	ChIRP (MaTAR25)	M. musculus	GSE142169	GSM4226220	SRR10741381	26281736	25417582	22292258	15002522	None	None	None	None
42	One-to-all	input	ChIRP (MaTAR25)	M. musculus	GSE142169	GSM4226221	SRR10741382	15527507	15029044	13267900	5550317	None	None	None	None
42	One-to-all	input	ChIRP (MaTAR25)	M. musculus	GSE142169	GSM4226222	SRR10741383	28450522	27951587	25480110	22333444	None	None	None	None
42	One-to-all	treatment	ChIRP (MaTAR25)	M. musculus	GSE142169	GSM4226224	SRR10741385	9028671	6384238	5439535	4437474	None	4 424 098	None	None
42	One-to-all	treatment	ChIRP (MaTAR25)	M. musculus	GSE142169	GSM4226225	SRR10741386	6364758	4159930	3516883	2900632	None	2 894 944	None	None
42	One-to-all	treatment	ChIRP (MaTAR25)	M. musculus	GSE142169	GSM4226226	SRR10741387	13044598	6922985	5908378	4355562	None	4 324 328	None	None
42	One-to-all	treatment	ChIRP (MaTAR25)	M. musculus	GSE142169	GSM4226227	SRR10741388	7314183	2924633	2504861	1776473	None	1 767 355	None	None
42	One-to-all	treatment	ChIRP (MaTAR25)	M. musculus	GSE142169	GSM4226228	SRR10741389	8766015	4518209	3788156	2694254	None	2 688 153	None	None
43	One-to-all	input	ChIRP (MaTAR25)	M. musculus	GSE142169	GSM4226220	SRR10741381	26281736	25417582	22292258	15002522	None	None	None	None
43	One-to-all	input	ChIRP (MaTAR25)	M. musculus	GSE142169	GSM4226221	SRR10741382	15527507	15029044	13267900	5550317	None	None	None	None
43	One-to-all	treatment	ChIRP (MaTAR25)	M. musculus	GSE142169	GSM4226218	SRR10741379	6188074	5372885	4670473	3789509	None	3 782 614	None	None
43	One-to-all	treatment	ChIRP (MaTAR25)	M. musculus	GSE142169	GSM4226219	SRR10741380	8693647	6348697	5350511	4252990	None	4 243 803	None	None
44	One-to-all	input	ChIRP (MaTAR25)	M. musculus	GSE142169	GSM4226233	SRR10741394	6538643	6306017	5617962	1875850	None	None	None	None
44	One-to-all	input	ChIRP (MaTAR25)	M. musculus	GSE142169	GSM4226234	SRR10741395	17897848	16183127	13914466	7865539	None	None	None	None
44	One-to-all	treatment	ChIRP (MaTAR25)	M. musculus	GSE142169	GSM4226230	SRR10741391	8317999	5981940	5036788	3763085	None	3 753 828	None	None
44	One-to-all	treatment	ChIRP (MaTAR25)	M. musculus	GSE142169	GSM4226231	SRR10741392	10390309	7719760	6344737	5018316	None	5 006 317	None	None
45	One-to-all	input	CHART (XIST)	M. musculus	GSE144834	GSM4299025	SRR11033406	30363106	27450178	25595637	13184552	None	None	None	None
45	One-to-all	input	CHART (XIST)	M. musculus	GSE144834	GSM4299029	SRR11033410	29071768	25362119	23488367	12324839	None	None	None	None
45	One-to-all	treatment	CHART (XIST)	M. musculus	GSE144834	GSM4299027	SRR11033408	29340178	25526128	23969326	11500861	None	11 469 427	None	None
45	One-to-all	treatment	CHART (XIST)	M. musculus	GSE144834	GSM4299031	SRR11033412	39959151	34399380	31137190	16381508	None	16 335 442	None	None
46	One-to-all	input	CHART (XIST)	M. musculus	GSE144834	GSM4299026	SRR11033407	29355659	26426168	24700591	12792945	None	None	None	None
46	One-to-all	input	CHART (XIST)	M. musculus	GSE144834	GSM4299030	SRR11033411	46608043	40939633	37797661	20108393	None	None	None	None
46	One-to-all	treatment	CHART (XIST)	M. musculus	GSE144834	GSM4299028	SRR11033409	50268698	41361084	38731332	18244344	None	18 182 968	None	None
46	One-to-all	treatment	CHART (XIST)	M. musculus	GSE144834	GSM4299032	SRR11033413	43366370	36727385	33672121	16151401	None	16 087 802	None	None
47	One-to-all	input	ChIRP (IAP, LINE1)	M. musculus	GSE146467	GSM4875641	SRR12960868	42509765	6914909	4577209	3334624	None	None	None	None
47	One-to-all	treatment	ChIRP (IAP, LINE1)	M. musculus	GSE146467	GSM4875639	SRR12960866	67181494	17144927	12887932	9640081	None	9 545 586	None	None
47	One-to-all	treatment	ChIRP (IAP, LINE1)	M. musculus	GSE146467	GSM4875640	SRR12960867	63834992	15121231	11312854	8516261	None	8 436 453	None	None
48	One-to-all	input	ChIRP (IAP, LINE1)	M. musculus	GSE146467	GSM4875641	SRR12960868	42509765	6914909	4577209	3334624	None	None	None	None
48	One-to-all	treatment	ChIRP (IAP, LINE1)	M. musculus	GSE146467	GSM4875653	SRR12960880	62589489	55818228	48253526	34690345	None	34 546 228	None	None
48	One-to-all	treatment	ChIRP (IAP, LINE1)	M. musculus	GSE146467	GSM4875654	SRR12960881	67780072	56746295	48037755	34386211	None	34 242 247	None	None
49	One-to-all	input	ChIRP (IAP, LINE1)	M. musculus	GSE146467	GSM4875641	SRR12960868	42509765	6914909	4577209	3334624	None	None	None	None
49	One-to-all	treatment	ChIRP (IAP, LINE1)	M. musculus	GSE146467	GSM4875644	SRR12960871	60247549	20877491	16927506	13252366	None	13 145 686	None	None
49	One-to-all	treatment	ChIRP (IAP, LINE1)	M. musculus	GSE146467	GSM4875645	SRR12960872	40818782	10698265	8294800	6331880	None	6 284 951	None	None
50	One-to-all	input	ChIRP (IAP, LINE1)	M. musculus	GSE146467	GSM4875648	SRR12960875	33082391	7469740	6116193	4634290	None	None	None	None
50	One-to-all	treatment	ChIRP (IAP, LINE1)	M. musculus	GSE146467	GSM4875646	SRR12960873	56879885	14587763	12181050	9070914	None	9 003 818	None	None
50	One-to-all	treatment	ChIRP (IAP, LINE1)	M. musculus	GSE146467	GSM4875647	SRR12960874	51139687	18693407	16436953	12582819	None	12 474 986	None	None
51	One-to-all	input	ChIRP (IAP, LINE1)	M. musculus	GSE146467	GSM4875648	SRR12960875	33082391	7469740	6116193	4634290	None	None	None	None
51	One-to-all	treatment	ChIRP (IAP, LINE1)	M. musculus	GSE146467	GSM4875655	SRR12960882	81270936	65313200	55660150	38283828	None	38 101 114	None	None
51	One-to-all	treatment	ChIRP (IAP, LINE1)	M. musculus	GSE146467	GSM4875656	SRR12960883	65373582	56221628	48117844	34939931	None	34 781 767	None	None
52	One-to-all	input	ChIRP (IAP, LINE1)	M. musculus	GSE146467	GSM4875648	SRR12960875	33082391	7469740	6116193	4634290	None	None	None	None
52	One-to-all	treatment	ChIRP (IAP, LINE1)	M. musculus	GSE146467	GSM4875651	SRR12960878	49435655	15347849	13119091	10223175	None	10 142 141	None	None
52	One-to-all	treatment	ChIRP (IAP, LINE1)	M. musculus	GSE146467	GSM4875652	SRR12960879	51179969	15657760	13482026	10560168	None	10 492 901	None	None
53	One-to-all	input	ChIRP (IAP, LINE1)	M. musculus	GSE146467	GSM4875657	SRR12960884	34571522	31494847	29037356	12907638	None	None	None	None
53	One-to-all	treatment	ChIRP (IAP, LINE1)	M. musculus	GSE146467	GSM4875658	SRR12960885	31311462	18950415	17016034	7042003	None	7 014 993	None	None
53	One-to-all	treatment	ChIRP (IAP, LINE1)	M. musculus	GSE146467	GSM4875659	SRR12960886	25591302	16281208	15350034	5756659	None	5 732 150	None	None
54	One-to-all	input	ChIRP (IAP, LINE1)	M. musculus	GSE146467	GSM4875657	SRR12960884	34571522	31494847	29037356	12907638	None	None	None	None
54	One-to-all	treatment	ChIRP (IAP, LINE1)	M. musculus	GSE146467	GSM4875660	SRR12960887	28895334	13111985	11492278	4141035	None	4 134 644	None	None
54	One-to-all	treatment	ChIRP (IAP, LINE1)	M. musculus	GSE146467	GSM4875661	SRR12960888	28055262	20839919	19116896	8585498	None	8 574 779	None	None
55	One-to-all	input	ChIRP (IAP, LINE1)	M. musculus	GSE146467	GSM4875657	SRR12960884	34571522	31494847	29037356	12907638	None	None	None	None
55	One-to-all	treatment	ChIRP (IAP, LINE1)	M. musculus	GSE146467	GSM4875664	SRR12960891	40457074	29902781	27661973	11357357	None	11 317 442	None	None
55	One-to-all	treatment	ChIRP (IAP, LINE1)	M. musculus	GSE146467	GSM4875665	SRR12960892	27016654	11142104	10251291	3803021	None	3 790 967	None	None
56	One-to-all	input	ChIRP (IAP, LINE1)	M. musculus	GSE146467	GSM4669086	SRR12211431	34674076	20040912	17895836	6558602	None	None	None	None
56	One-to-all	treatment	ChIRP (IAP, LINE1)	M. musculus	GSE146467	GSM4669084	SRR12211429	33653465	19464406	17658890	7686396	None	7 662 070	None	None
56	One-to-all	treatment	ChIRP (IAP, LINE1)	M. musculus	GSE146467	GSM4669085	SRR12211430	33743317	20769080	18812671	7844415	None	7 818 096	None	None
57	One-to-all	input	ChIRP (IAP, LINE1)	M. musculus	GSE146467	GSM4669086	SRR12211431	34674076	20040912	17895836	6558602	None	None	None	None
57	One-to-all	treatment	ChIRP (IAP, LINE1)	M. musculus	GSE146467	GSM4669087	SRR12211432	25616410	11050413	9965510	7485487	None	7 466 266	None	None
57	One-to-all	treatment	ChIRP (IAP, LINE1)	M. musculus	GSE146467	GSM4669088	SRR12211433	31022663	23207963	21253229	8930604	None	8 923 051	None	None
58	One-to-all	input	ChIRP (IAP, LINE1)	M. musculus	GSE146467	GSM4669086	SRR12211431	34674076	20040912	17895836	6558602	None	None	None	None
58	One-to-all	treatment	ChIRP (IAP, LINE1)	M. musculus	GSE146467	GSM4669091	SRR12211436	36049431	10841504	9400417	7350541	None	7 301 705	None	None
58	One-to-all	treatment	ChIRP (IAP, LINE1)	M. musculus	GSE146467	GSM4669092	SRR12211437	33520524	17805349	15919169	7324237	None	7 300 747	None	None
59	One-to-all	input	ChIRP (7SK)	H. sapiens	GSE147055	GSM4413741	SRR11313860	62609863	53646483	49804838	45631091	None	None	None	None
59	One-to-all	input	ChIRP (7SK)	H. sapiens	GSE147055	GSM4413742	SRR11313861	46968795	40778307	34673944	26690619	None	None	None	None
59	One-to-all	treatment	ChIRP (7SK)	H. sapiens	GSE147055	GSM4413748	SRR11313867	54737441	13520477	10036264	8210387	None	8 185 806	None	None
59	One-to-all	treatment	ChIRP (7SK)	H. sapiens	GSE147055	GSM4413750	SRR11313869	39609754	18584083	14631712	12286364	None	12 229 716	None	None
60	One-to-all	input	ChIRP (7SK)	H. sapiens	GSE147055	GSM4413741	SRR11313860	62609863	53646483	49804838	45631091	None	None	None	None
60	One-to-all	input	ChIRP (7SK)	H. sapiens	GSE147055	GSM4413742	SRR11313861	46968795	40778307	34673944	26690619	None	None	None	None
60	One-to-all	treatment	ChIRP (7SK)	H. sapiens	GSE147055	GSM4413747	SRR11313866	46071048	11239650	8571067	6939725	None	6 915 576	None	None
60	One-to-all	treatment	ChIRP (7SK)	H. sapiens	GSE147055	GSM4413749	SRR11313868	51604397	26239143	21251260	17929195	None	17 834 685	None	None
61	One-to-all	input	ChIRP (EPR)	M. musculus	GSE147208	GSM4420346	SRR11349916	13991062	13864173	9260341	2841136	None	None	None	None
61	One-to-all	treatment	ChIRP (EPR)	M. musculus	GSE147208	GSM4420345	SRR11349915	12545877	12404844	8135171	172122	None	172 015	None	None
61	One-to-all	treatment	ChIRP (EPR)	M. musculus	GSE147208	GSM4420347	SRR11349917	28529692	28337774	17981065	394419	None	393 617	None	None
62	One-to-all	input	ChIRP (SRA)	H. sapiens	GSE153004	GSM4632922	SRR12070828	65322350	62388500	59509702	51858770	None	None	None	None
62	One-to-all	input	ChIRP (SRA)	H. sapiens	GSE153004	GSM4632923	SRR12070829	68278305	65111050	62143104	54155351	None	None	None	None
62	One-to-all	input	ChIRP (SRA)	H. sapiens	GSE153004	GSM4632924	SRR12070830	60550124	57821801	55184761	48067533	None	None	None	None
62	One-to-all	treatment	ChIRP (SRA)	H. sapiens	GSE153004	GSM4632919	SRR12070825	60018361	44501493	43285713	37318614	None	37 197 968	None	None
62	One-to-all	treatment	ChIRP (SRA)	H. sapiens	GSE153004	GSM4632920	SRR12070826	64525325	47884069	46595210	40146981	None	40 018 789	None	None
62	One-to-all	treatment	ChIRP (SRA)	H. sapiens	GSE153004	GSM4632921	SRR12070827	60092853	45741622	44479070	38370811	None	38 247 222	None	None
63	One-to-all	input	ChIRP (DRAIR)	H. sapiens	GSE156122	GSM4725013	SRR12439850	45868386	43898121	41674444	36404097	None	None	None	None
63	One-to-all	input	ChIRP (DRAIR)	H. sapiens	GSE156122	GSM4725015	SRR12439852	50392787	47638665	44477858	39032193	None	None	None	None
63	One-to-all	treatment	ChIRP (DRAIR)	H. sapiens	GSE156122	GSM4725012	SRR12439849	27619913	25894756	24380987	20417654	None	20 328 078	None	None
63	One-to-all	treatment	ChIRP (DRAIR)	H. sapiens	GSE156122	GSM4725014	SRR12439851	46221629	27389033	26381065	22814558	None	22 703 326	None	None
64	One-to-all	input	ChIRP (LncMyoD)	M. musculus	GSE159132	GSM4819901	SRR12782005	105619058	97466138	93566159	52729867	None	None	None	None
64	One-to-all	input	ChIRP (LncMyoD)	M. musculus	GSE159132	GSM4819904	SRR12782008	148325480	141911997	135184851	88477757	None	None	None	None
64	One-to-all	treatment	ChIRP (LncMyoD)	M. musculus	GSE159132	GSM4819899	SRR12782003	21716717	17736495	16766676	9488716	None	9 483 130	None	None
64	One-to-all	treatment	ChIRP (LncMyoD)	M. musculus	GSE159132	GSM4819900	SRR12782004	39974014	35900537	34633580	19732707	None	19 724 115	None	None
64	One-to-all	treatment	ChIRP (LncMyoD)	M. musculus	GSE159132	GSM4819902	SRR12782006	37694509	34188995	32725860	20285416	None	20 277 595	None	None
64	One-to-all	treatment	ChIRP (LncMyoD)	M. musculus	GSE159132	GSM4819903	SRR12782007	32158714	28957785	27812207	15511962	None	15 504 888	None	None
65	One-to-all	input	ChIRP (ANRIL)	H. sapiens	GSE162224	GSM4947071	SRR13155330	50256321	47205550	38814274	33019030	None	None	None	None
65	One-to-all	input	ChIRP (ANRIL)	H. sapiens	GSE162224	GSM4947072	SRR13155331	50373183	46798120	39356712	33403017	None	None	None	None
65	One-to-all	treatment	ChIRP (ANRIL)	H. sapiens	GSE162224	GSM4947063	SRR13155322	46138519	33762975	26362332	20877197	None	20 709 058	None	None
65	One-to-all	treatment	ChIRP (ANRIL)	H. sapiens	GSE162224	GSM4947064	SRR13155323	44658476	30599154	24447024	19469926	None	19 311 876	None	None
65	One-to-all	treatment	ChIRP (ANRIL)	H. sapiens	GSE162224	GSM4947065	SRR13155324	49672784	41710418	34072166	27937018	None	27 705 306	None	None
65	One-to-all	treatment	ChIRP (ANRIL)	H. sapiens	GSE162224	GSM4947066	SRR13155325	45593381	36362300	29263763	24016320	None	23 819 915	None	None
66	One-to-all	input	ChIRP (NFΚBMARL-1)	H. sapiens	GSE167511	GSM5106470	SRR13782944	34821666	29270417	27468214	12523707	None	None	None	None
66	One-to-all	treatment	ChIRP (NFΚBMARL-1)	H. sapiens	GSE167511	GSM5106467	SRR13782941	17808263	12638177	11187348	4425164	None	4 389 905	None	None
66	One-to-all	treatment	ChIRP (NFΚBMARL-1)	H. sapiens	GSE167511	GSM5106469	SRR13782943	16036729	13079481	11733558	4747932	None	4 709 399	None	None
67	One-to-all	input	ChIRP (NFΚBMARL-1)	H. sapiens	GSE167511	GSM5106470	SRR13782944	34821666	29270417	27468214	12523707	None	None	None	None
67	One-to-all	treatment	ChIRP (NFΚBMARL-1)	H. sapiens	GSE167511	GSM5106463	SRR13782937	35580819	30830341	26972586	15176087	None	15 019 826	None	None
67	One-to-all	treatment	ChIRP (NFΚBMARL-1)	H. sapiens	GSE167511	GSM5106465	SRR13782939	12545432	11822557	10655212	6571908	None	6 516 239	None	None
68	One-to-all	input	ChIRP (TERC)	H. sapiens	GSE31332	GSM820432	SRR360704	39823083	37306196	31088348	26671120	None	None	None	None
68	One-to-all	treatment	ChIRP (TERC)	H. sapiens	GSE31332	GSM820437	SRR360709	24743830	17812782	15402431	12099129	None	12 081 937	None	None
68	One-to-all	treatment	ChIRP (TERC)	H. sapiens	GSE31332	GSM820438	SRR360710	40578560	25077460	18777747	15638811	None	15 616 889	None	None
69	One-to-all	input	ChIRP (TERC)	H. sapiens	GSE31332	GSM820432	SRR360704	39823083	37306196	31088348	26671120	None	None	None	None
69	One-to-all	treatment	ChIRP (TERC)	H. sapiens	GSE31332	GSM820430	SRR360702	25669303	19937196	16205567	11948211	None	11 926 775	None	None
69	One-to-all	treatment	ChIRP (TERC)	H. sapiens	GSE31332	GSM820431	SRR360703	32103639	26790473	19911802	14173903	None	14 125 119	None	None
70	One-to-all	input	ChIRP (HOTAIR)	H. sapiens	GSE31332	GSM820435	SRR360707	40199110	37866833	31262288	26609668	None	None	None	None
70	One-to-all	treatment	ChIRP (HOTAIR)	H. sapiens	GSE31332	GSM820433	SRR360705	13545775	7545832	6592133	4685388	None	4 581 189	None	None
70	One-to-all	treatment	ChIRP (HOTAIR)	H. sapiens	GSE31332	GSM820434	SRR360706	12011503	8218914	7228659	5842840	None	5 815 789	None	None
71	One-to-all	input	ChIRP (HOTAIR)	H. sapiens	GSE31332	GSM820435	SRR360707	40199110	37866833	31262288	26609668	None	None	None	None
71	One-to-all	treatment	ChIRP (HOTAIR)	H. sapiens	GSE31332	GSM820436	SRR360708	10285873	5727625	4905874	3338938	None	3 256 026	None	None
71	One-to-all	treatment	ChIRP (HOTAIR)	H. sapiens	GSE31332	GSM823786	SRR360712	20682387	9911205	7601811	6017174	None	5 997 658	None	None
72	One-to-all	input	ChIRP (116HG)	M. musculus	GSE43575	GSM1065676	SRR650309	34712196	30570000	21105786	15777120	None	None	None	None
72	One-to-all	treatment	ChIRP (116HG)	M. musculus	GSE43575	GSM1065674	SRR650307	44276018	28031729	24578303	19831013	None	19 730 207	None	None
73	One-to-all	input	ChIRP (116HG)	M. musculus	GSE43575	GSM1065676	SRR650309	34712196	30570000	21105786	15777120	None	None	None	None
73	One-to-all	treatment	ChIRP (116HG)	M. musculus	GSE43575	GSM1065671	SRR650303	62981216	25279276	13740512	4231132	None	4 173 530	None	None
73	One-to-all	treatment	ChIRP (116HG)	M. musculus	GSE43575	GSM1065673	SRR650305	49239586	17018025	14191989	2680904	None	2 635 248	None	None
73	One-to-all	treatment	ChIRP (116HG)	M. musculus	GSE43575	GSM1065673	SRR650306	57624915	25362549	15093694	2689845	None	2 640 943	None	None
74	One-to-all	input	RAP-seq (Xist)	M. musculus	GSE46918	GSM1141190	SRR850643	1175999	1110905	1051257	749369	None	None	None	None	quality score has been lowered to 22
74	One-to-all	treatment	RAP-seq (Xist)	M. musculus	GSE46918	GSM1141187	SRR850640	3701533	2338458	1723905	1237152	None	1 231 215	None	None
75	One-to-all	input	RAP-seq (Xist)	M. musculus	GSE46918	GSM1141191	SRR850644	2581332	2461643	1978659	1485979	None	None	None	None
75	One-to-all	treatment	RAP-seq (Xist)	M. musculus	GSE46918	GSM1141188	SRR850641	4768433	3932481	3566661	2686172	None	2 678 200	None	None
76	One-to-all	input	RAP-seq (Xist)	M. musculus	GSE46918	GSM1141195	SRR850648	1964255	1895141	1545502	1016107	None	None	None	None	quality score has been lowered to 22
76	One-to-all	treatment	RAP-seq (Xist)	M. musculus	GSE46918	GSM1141200	SRR850653	17839255	5346976	3607249	2295895	None	2 289 257	None	None	quality score has been lowered to 22
77	One-to-all	input	RAP-seq (Xist)	M. musculus	GSE46918	GSM1141193	SRR850646	2538455	2450201	2032116	1337295	None	None	None	None	quality score has been lowered to 22
77	One-to-all	treatment	RAP-seq (Xist)	M. musculus	GSE46918	GSM1141198	SRR850651	6795504	3516585	2866464	1840868	None	1 832 086	None	None	quality score has been lowered to 22
78	One-to-all	input	RAP-seq (Xist)	M. musculus	GSE46918	GSM1141196	SRR850649	4494501	4386841	3656449	2424005	None	None	None	None	quality score has been lowered to 22
78	One-to-all	treatment	RAP-seq (Xist)	M. musculus	GSE46918	GSM1141201	SRR850654	5448650	1289385	738213	463315	None	461 970	None	None	quality score has been lowered to 22
79	One-to-all	input	RAP-seq (Xist)	M. musculus	GSE46918	GSM1141194	SRR850647	3720600	3616781	2951062	1908120	None	None	None	None	quality score has been lowered to 22
79	One-to-all	treatment	RAP-seq (Xist)	M. musculus	GSE46918	GSM1141199	SRR850652	6433723	2995221	2416494	1568760	None	1 565 630	None	None	quality score has been lowered to 22
80	One-to-all	input	RAP-seq (Xist)	M. musculus	GSE46918	GSM1141181	SRR850634	14985320	14396240	12327928	9293733	None	None	None	None
80	One-to-all	treatment	RAP-seq (Xist)	M. musculus	GSE46918	GSM1141179	SRR850632	6447305	2403855	1806364	1236754	None	1 235 361	None	None
81	One-to-all	input	RAP-seq (Xist)	M. musculus	GSE46918	GSM1141189	SRR850642	1262167	1080507	983868	680934	None	None	None	None	quality score has been lowered to 22
81	One-to-all	treatment	RAP-seq (Xist)	M. musculus	GSE46918	GSM1141186	SRR850639	4028822	2385168	1818003	1327479	None	1 320 564	None	None
82	One-to-all	input	RAP-seq (Xist)	M. musculus	GSE46918	GSM1141185	SRR850638	17638441	17093807	12967882	9583125	None	None	None	None
82	One-to-all	treatment	RAP-seq (Xist)	M. musculus	GSE46918	GSM1141183	SRR850636	6822506	1805864	1095344	782301	None	781 187	None	None
83	One-to-all	input	RAP-seq (Xist)	M. musculus	GSE46918	GSM1141184	SRR850637	19817683	19250562	13284624	9882020	None	None	None	None
83	One-to-all	treatment	RAP-seq (Xist)	M. musculus	GSE46918	GSM1141182	SRR850635	8716276	5865163	5067892	3762497	None	3 751 228	None	None
84	One-to-all	input	CHART (Xist)	M. musculus	GSE48649	GSM1182877	SRR927474	97531596	96829744	81886321	59955313	None	None	None	None
84	One-to-all	treatment	CHART (Xist)	M. musculus	GSE48649	GSM1182883	SRR927480	45605734	39747631	37159262	27699212	None	27 629 299	None	None
85	One-to-all	input	CHART (Xist)	M. musculus	GSE48649	GSM1182877	SRR927474	97531596	96829744	81886321	59955313	None	None	None	None
85	One-to-all	treatment	CHART (Xist)	M. musculus	GSE48649	GSM1182876	SRR927473	95362815	62440710	56371468	33377371	None	33 082 667	None	None
86	One-to-all	input	CHART (Xist)	M. musculus	GSE48649	GSM1182877	SRR927474	97531596	96829744	81886321	59955313	None	None	None	None
86	One-to-all	treatment	CHART (Xist)	M. musculus	GSE48649	GSM1182878	SRR927475	40184775	36863023	34055100	24794598	None	24 659 060	None	None
87	One-to-all	input	CHART (Xist)	M. musculus	GSE48649	GSM1182877	SRR927474	97531596	96829744	81886321	59955313	None	None	None	None
87	One-to-all	treatment	CHART (Xist)	M. musculus	GSE48649	GSM1182881	SRR927478	54076151	42469337	38948397	26912719	None	26 759 507	None	None
88	One-to-all	input	CHART (Xist)	M. musculus	GSE48649	GSM1182877	SRR927474	97531596	96829744	81886321	59955313	None	None	None	None
88	One-to-all	treatment	CHART (Xist)	M. musculus	GSE48649	GSM1182882	SRR927479	36000000	32020172	29739432	21705029	None	21 594 902	None	None
89	One-to-all	input	CHART (Xist)	M. musculus	GSE48649	GSM1182877	SRR927474	97531596	96829744	81886321	59955313	None	None	None	None
89	One-to-all	treatment	CHART (Xist)	M. musculus	GSE48649	GSM1182875	SRR927472	65646360	55661171	45255476	28987220	None	28 754 736	None	None	quality score has been lowered to 22
90	One-to-all	input	CHART (Paupar)	M. musculus	GSE52571	GSM1269959	SRR1033808	50443636	48932364	36152106	29054292	None	None	None	None
90	One-to-all	treatment	CHART (Paupar)	M. musculus	GSE52571	GSM1269957	SRR1033806	45657399	37479001	33952917	28307636	None	28 258 774	None	None
90	One-to-all	treatment	CHART (Paupar)	M. musculus	GSE52571	GSM1269958	SRR1033807	48537206	41637226	37755409	31159511	None	31 110 484	None	None
91	One-to-all	input	ChIRP (LED)	H. sapiens	GSE53499	GSM1294973	SRR1055393	31041519	29615643	29159723	25503490	None	None	None	None
91	One-to-all	treatment	ChIRP (LED)	H. sapiens	GSE53499	GSM1294974	SRR1055394	37242108	22371329	21968434	18644711	None	18 569 450	None	None
91	One-to-all	treatment	ChIRP (LED)	H. sapiens	GSE53499	GSM1294975	SRR1055395	38932410	27154278	26688717	22802905	None	22 712 905	None	None
92	One-to-all	input	RAP (Malat1)	M. musculus	GSE55914	GSM1348367	SRR1193475	32622076	31990746	27238729	21003991	None	None	None	None
92	One-to-all	treatment	RAP (Malat1)	M. musculus	GSE55914	GSM1348369	SRR1193477	16204576	10455810	7842063	6162822	None	6 142 770	None	None
93	One-to-all	input	RAP (Malat1)	M. musculus	GSE55914	GSM1348366	SRR1193474	31833007	31223107	26486217	20283515	None	None	None	None
93	One-to-all	treatment	RAP (Malat1)	M. musculus	GSE55914	GSM1348368	SRR1193476	14344257	9301726	7321529	5919139	None	5 902 403	None	None
94	One-to-all	input	RAP (Malat1)	M. musculus	GSE55914	GSM1348347	SRR1193455	119302481	114792844	96067015	75844063	None	None	None	None
94	One-to-all	treatment	RAP (Malat1)	M. musculus	GSE55914	GSM1348346	SRR1193454	20716046	20198993	17755132	14417923	None	14 376 949	None	None
95	One-to-all	input	RAP (U1)	M. musculus	GSE55914	GSM1348371	SRR1193479	47623820	46406105	40524083	32429058	None	None	None	None
95	One-to-all	treatment	RAP (U1)	M. musculus	GSE55914	GSM1348373	SRR1193481	25883563	17091721	13239545	10071666	None	10 043 725	None	None
96	One-to-all	input	RAP (U1)	M. musculus	GSE55914	GSM1348370	SRR1193478	102203472	98782513	82256024	65317482	None	None	None	None
96	One-to-all	treatment	RAP (U1)	M. musculus	GSE55914	GSM1348372	SRR1193480	31238697	19675138	14463298	10500903	None	10 448 404	None	None
97	One-to-all	input	RAP (Xist)	M. musculus	GSE55914	GSM1348377	SRR1193485	29949848	29289452	26078410	20515986	None	None	None	None
97	One-to-all	treatment	RAP (Xist)	M. musculus	GSE55914	GSM1348376	SRR1193484	15739868	13700424	12020337	9815307	None	9 808 294	None	None
98	One-to-all	input	CHART (NEAT1, MALAT1)	H. sapiens	GSE58444	GSM1411212	SRR1386236	39959079	39346837	37502546	33569730	None	None	None	None
98	One-to-all	treatment	CHART (NEAT1, MALAT1)	H. sapiens	GSE58444	GSM1411209	SRR1386233	55538305	31111000	24471843	20212793	None	20 131 546	None	None
99	One-to-all	input	CHART (NEAT1, MALAT1)	H. sapiens	GSE58444	GSM1411212	SRR1386236	39959079	39346837	37502546	33569730	None	None	None	None
99	One-to-all	treatment	CHART (NEAT1, MALAT1)	H. sapiens	GSE58444	GSM1411210	SRR1386234	55819783	39443524	33191194	27022940	None	26 949 895	None	None
100	One-to-all	input	CHART (NEAT1, MALAT1)	H. sapiens	GSE58444	GSM1411211	SRR1386235	46101239	45915505	43712052	38703565	None	None	None	None
100	One-to-all	treatment	CHART (NEAT1, MALAT1)	H. sapiens	GSE58444	GSM1411207	SRR1386231	37702482	35383874	31440059	22304293	None	22 153 626	None	None
101	One-to-all	input	CHART (NEAT1, MALAT1)	H. sapiens	GSE58444	GSM1411211	SRR1386235	46101239	45915505	43712052	38703565	None	None	None	None
101	One-to-all	treatment	CHART (NEAT1, MALAT1)	H. sapiens	GSE58444	GSM1411208	SRR1386232	56901420	52347117	47535473	34334277	None	34 150 039	None	None
102	One-to-all	input	ChIRP (Haunt)	M. musculus	GSE58514	GSM1604255	SRR1793897	9025299	6758646	6205596	4828716	None	None	None	None
102	One-to-all	treatment	ChIRP (Haunt)	M. musculus	GSE58514	GSM1604256	SRR1793898	12675388	6824748	6167370	4772537	None	4 704 732	None	None
103	One-to-all	input	ChIRP (Haunt)	M. musculus	GSE58514	GSM1412848	SRR1793890	10876096	10109750	9126476	4446621	None	None	None	None
103	One-to-all	treatment	ChIRP (Haunt)	M. musculus	GSE58514	GSM1412849	SRR1793891	9876365	9229541	8230517	3981477	None	3 924 263	None	None
104	One-to-all	input	ChIRP (DACOR1)	H. sapiens	GSE58989	GSM1854426	SRR2163618	29453544	28717939	24192719	17540862	None	None	None	None
104	One-to-all	treatment	ChIRP (DACOR1)	H. sapiens	GSE58989	GSM1854427	SRR2163620	10561763	10396851	9155676	5356966	None	5 328 172	None	None
105	One-to-all	input	CHART (Paupar)	M. musculus	GSE52571	GSM1269959	SRR1033808	50443636	48932364	36152106	29054292	None	None	None	None
105	One-to-all	treatment	CHART (Dali)	M. musculus	GSE62035	GSM1518776	SRR1596420	49433260	46204939	33078258	26711057	None	26 650 993	None	None
105	One-to-all	treatment	CHART (Dali)	M. musculus	GSE62035	GSM1518777	SRR1596421	44722362	40746451	28624182	23642625	None	23 593 707	None	None
105	One-to-all	treatment	CHART (Dali)	M. musculus	GSE62035	GSM1518778	SRR1596422	42163916	39306710	28015359	20816261	None	20 778 804	None	None
106	One-to-all	input	ChIRP (LncHSC-2)	M. musculus	GSE63277	GSM1632677	SRR1914287	28675917	26398189	25285307	18093753	None	None	None	None
106	One-to-all	treatment	ChIRP (LncHSC-2)	M. musculus	GSE63277	GSM1632678	SRR1914288	10604916	4938204	3510250	2194594	None	2 170 824	None	None
106	One-to-all	treatment	ChIRP (LncHSC-2)	M. musculus	GSE63277	GSM1632679	SRR1914289	10728899	4679168	3340213	2068085	None	2 045 258	None	None
106	One-to-all	treatment	ChIRP (LncHSC-2)	M. musculus	GSE63277	GSM1632680	SRR1914290	9662010	9523957	8213507	5900911	None	5 806 937	None	None
106	One-to-all	treatment	ChIRP (LncHSC-2)	M. musculus	GSE63277	GSM1632681	SRR1914291	9721611	9570465	8351047	6014255	None	5 918 996	None	None
107	One-to-all	input	ChIRP (LncHSC-2)	M. musculus	GSE63277	GSM1632677	SRR1914287	28675917	26398189	25285307	18093753	None	None	None	None
107	One-to-all	input	ChIRP (LncHSC-2)	M. musculus	GSE63277	GSM1632685	SRR1914295	9751558	4360888	3306043	1966862	None	None	None	None
107	One-to-all	input	ChIRP (LncHSC-2)	M. musculus	GSE63277	GSM1632684	SRR1914294	9675562	4594278	3465302	2085173	None	None	None	None
107	One-to-all	treatment	ChIRP (LncHSC-2)	M. musculus	GSE63277	GSM1632675	SRR1914285	36779829	10452742	9154253	5119152	None	4 996 371	None	None
107	One-to-all	treatment	ChIRP (LncHSC-2)	M. musculus	GSE63277	GSM1632676	SRR1914286	36481984	11825002	10592453	5984057	None	5 831 751	None	None
108	One-to-all	input	ChIRP (7SK)	H. sapiens	GSE69143	GSM1693800	SRR2036986	54614311	52913490	51954707	48026549	None	None	None	None
108	One-to-all	treatment	ChIRP (7SK)	H. sapiens	GSE69143	GSM1693798	SRR2036984	50669413	31243355	30458149	27252326	None	27 144 644	None	None
108	One-to-all	treatment	ChIRP (7SK)	H. sapiens	GSE69143	GSM1693799	SRR2036985	41231813	28480508	27849393	24296678	None	24 243 589	None	None
109	One-to-all	input	ChIRP (7SK)	H. sapiens	GSE69143	GSM1693803	SRR2036989	58848738	55976111	54849906	49639311	None	None	None	None
109	One-to-all	treatment	ChIRP (7SK)	H. sapiens	GSE69143	GSM1693801	SRR2036987	55471141	42661238	41854924	37691500	None	37 560 687	None	None
109	One-to-all	treatment	ChIRP (7SK)	H. sapiens	GSE69143	GSM1693802	SRR2036988	41987796	32115145	31350918	27382978	None	27 318 562	None	None
110	One-to-all	input	ChIRP (7SK)	M. musculus	GSE69143	GSM1693797	SRR2036983	235169004	203879529	191844113	168237790	None	None	None	None
110	One-to-all	treatment	ChIRP (7SK)	M. musculus	GSE69143	GSM1693795	SRR2036981	83153253	61227357	59083449	28208253	None	28 158 723	None	None
110	One-to-all	treatment	ChIRP (7SK)	M. musculus	GSE69143	GSM1693796	SRR2036982	114238243	94880475	90558432	41011226	None	40 968 023	None	None
111	One-to-all	input	ChIRP (7SK)	M. musculus	GSE69143	GSM1693797	SRR2036983	235169004	203879529	191844113	168237790	None	None	None	None
111	One-to-all	treatment	ChIRP (7SK)	M. musculus	GSE69143	GSM1865824	SRR2226205	104390846	55636995	52709043	21928686	None	21 883 574	None	None
111	One-to-all	treatment	ChIRP (7SK)	M. musculus	GSE69143	GSM1865825	SRR2226206	104997360	85436670	81884691	36833076	None	36 791 393	None	None
112	One-to-all	input	CHIRT (PAR-TERRA, TERRA)	M. musculus	GSE69887	GSM2429693	SRR5112946	45396054	41995354	39782929	31164546	None	None	None	None
112	One-to-all	treatment	CHIRT (PAR-TERRA, TERRA)	M. musculus	GSE69887	GSM1711914	SRR2062967	32464373	31406305	29636055	22598361	None	22 482 614	None	None
113	One-to-all	input	CHIRT (PAR-TERRA, TERRA)	M. musculus	GSE69887	GSM2429693	SRR5112946	45396054	41995354	39782929	31164546	None	None	None	None
113	One-to-all	treatment	CHIRT (PAR-TERRA, TERRA)	M. musculus	GSE69887	GSM2429690	SRR5112943	28932181	23921122	22514262	16334378	None	16 268 482	None	None
114	One-to-all	input	CHIRT (PAR-TERRA, TERRA)	M. musculus	GSE69887	GSM1711924	SRR2062977	30065363	27239081	25569914	19638843	None	None	None	None
114	One-to-all	treatment	CHIRT (PAR-TERRA, TERRA)	M. musculus	GSE69887	GSM1711925	SRR2062978	41668524	35378417	32914684	20062604	None	19 953 034	None	None
115	One-to-all	input	CHIRT (PAR-TERRA, TERRA)	M. musculus	GSE69887	GSM1711924	SRR2062977	30065363	27239081	25569914	19638843	None	None	None	None
115	One-to-all	treatment	CHIRT (PAR-TERRA, TERRA)	M. musculus	GSE69887	GSM1711926	SRR2062979	33458866	27563092	25691662	16666994	None	16 552 706	None	None
116	One-to-all	input	CHIRT (PAR-TERRA, TERRA)	M. musculus	GSE69887	GSM1711927	SRR2062980	37132369	36007308	33833540	8727991	None	None	None	None
116	One-to-all	treatment	CHIRT (PAR-TERRA, TERRA)	M. musculus	GSE69887	GSM1711928	SRR2062981	36815663	34275756	32073336	23123988	None	22 925 532	None	None
117	One-to-all	input	CHIRT (PAR-TERRA, TERRA)	M. musculus	GSE69887	GSM1711927	SRR2062980	37132369	36007308	33833540	8727991	None	None	None	None
117	One-to-all	treatment	CHIRT (PAR-TERRA, TERRA)	M. musculus	GSE69887	GSM1711929	SRR2062982	33045601	26974885	24947482	16466336	None	16 314 142	None	None
118	One-to-all	input	CHIRT (PAR-TERRA, TERRA)	M. musculus	GSE69887	GSM1711923	SRR2062976	46619652	40086123	37942096	28180111	None	None	None	None
118	One-to-all	treatment	CHIRT (PAR-TERRA, TERRA)	M. musculus	GSE69887	GSM1711919	SRR2062972	31682605	28970249	27572903	18021404	None	17 940 971	None	None
119	One-to-all	input	CHIRT (PAR-TERRA, TERRA)	M. musculus	GSE69887	GSM1711923	SRR2062976	46619652	40086123	37942096	28180111	None	None	None	None
119	One-to-all	treatment	CHIRT (PAR-TERRA, TERRA)	M. musculus	GSE69887	GSM1711920	SRR2062973	35059769	32382596	30764598	5200738	None	5 166 460	None	None
120	One-to-all	input	ChIRP (Hotchon)	M. musculus	GSE70986	GSM1824717	SRR2104460	35702739	30529521	30529521	26254173	None	None	None	None
120	One-to-all	treatment	ChIRP (Hotchon)	M. musculus	GSE70986	GSM1824715	SRR2104458	47100508	3310808	3310808	620106	None	613 167	None	None
120	One-to-all	treatment	ChIRP (Hotchon)	M. musculus	GSE70986	GSM1824716	SRR2104459	47792142	3915864	3915864	657658	None	653 041	None	None
121	One-to-all	input	ChIRP (Panct1)	M. musculus	GSE73806	GSM1903801	SRR2570140	66333356	59911169	55843749	46706753	None	None	None	None
121	One-to-all	treatment	ChIRP (Panct1)	M. musculus	GSE73806	GSM1903799	SRR2570137	71068885	59624040	55470778	43591507	None	43 330 343	None	None
121	One-to-all	treatment	ChIRP (Panct1)	M. musculus	GSE73806	GSM1903800	SRR2570139	59529361	48783741	44588127	30464269	None	30 319 446	None	None
122	One-to-all	input	ChIRP (DINO)	H. sapiens	GSE76420	GSM2011205	SRR3066465	38948135	26163554	25535678	21090217	None	None	None	None
122	One-to-all	treatment	ChIRP (DINO)	H. sapiens	GSE76420	GSM2011201	SRR3066461	17505168	8491572	8231748	6247160	None	6 234 201	None	None
122	One-to-all	treatment	ChIRP (DINO)	H. sapiens	GSE76420	GSM2011202	SRR3066462	17533734	4238814	4055566	2245203	None	2 235 817	None	None
123	One-to-all	input	ChIRP (Tug1)	M. musculus	GSE77493	GSM2053305	SRR3139777	66507983	53110680	48139588	39427317	None	None	None	None
123	One-to-all	input	ChIRP (Tug1)	M. musculus	GSE77493	GSM2053306	SRR3139778	9488981	7018236	6055316	3627013	None	None	None	None
123	One-to-all	treatment	ChIRP (Tug1)	M. musculus	GSE77493	GSM2053301	SRR3139773	22368027	8029819	6344830	1154677	None	1 147 395	None	None
123	One-to-all	treatment	ChIRP (Tug1)	M. musculus	GSE77493	GSM2053303	SRR3139775	21053092	6585850	5025908	317777	None	315 342	None	None
123	One-to-all	treatment	ChIRP (Tug1)	M. musculus	GSE77493	GSM2053302	SRR3139774	21188505	6944792	5431333	1453672	None	1 436 002	None	None
123	One-to-all	treatment	ChIRP (Tug1)	M. musculus	GSE77493	GSM2053304	SRR3139776	26379949	5867303	4621444	1251578	None	1 236 058	None	None
124	One-to-all	input	CHIRT (TERRA)	M. musculus	GSE79180	GSM1711918	SRR2062971	45396054	41995354	39782929	31164546	None	None	None	None
124	One-to-all	treatment	CHIRT (TERRA)	M. musculus	GSE79180	GSM1711915	SRR2062968	28932181	23921122	22514262	16334378	None	16 268 482	None	None
125	One-to-all	input	CHART (Xist)	M. musculus	GSE80510	GSM2128917	SRR3407180	15677699	14743699	11381576	8671964	None	None	None	None
125	One-to-all	treatment	CHART (Xist)	M. musculus	GSE80510	GSM2128917	SRR3407179	12220550	6318522	4196227	2865713	None	2 838 908	None	None
126	One-to-all	input	CHART (B2)	M. musculus	GSE82255	GSM2187200	SRR3624803	58562207	29558255	27064727	11408011	None	None	None	None
126	One-to-all	input	CHART (B2)	M. musculus	GSE82255	GSM2187201	SRR3624804	14611735	14601115	13810279	10812088	None	None	None	None
126	One-to-all	treatment	CHART (B2)	M. musculus	GSE82255	GSM2187194	SRR3624797	53119882	42663136	38682079	29329113	None	28 913 482	None	None
126	One-to-all	treatment	CHART (B2)	M. musculus	GSE82255	GSM2187195	SRR3624798	68254092	67861638	65014922	38310443	None	37 335 255	None	None
127	One-to-all	input	CHART (B2)	M. musculus	GSE82255	GSM2187200	SRR3624803	58562207	29558255	27064727	11408011	None	None	None	None
127	One-to-all	input	CHART (B2)	M. musculus	GSE82255	GSM2187201	SRR3624804	14611735	14601115	13810279	10812088	None	None	None	None
127	One-to-all	treatment	CHART (B2)	M. musculus	GSE82255	GSM2419790	SRR5086819	61023798	17881578	13211728	7084914	None	6 928 925	None	None
128	One-to-all	input	CHART (B2)	M. musculus	GSE82255	GSM2187198	SRR3624801	58433208	42682154	39731067	20542354	None	None	None	None
128	One-to-all	input	CHART (B2)	M. musculus	GSE82255	GSM2187199	SRR3624802	19145767	19127094	18250108	14034923	None	None	None	None
128	One-to-all	treatment	CHART (B2)	M. musculus	GSE82255	GSM2187192	SRR3624795	54513216	26829973	23314257	16628394	None	16 375 061	None	None
128	One-to-all	treatment	CHART (B2)	M. musculus	GSE82255	GSM2187193	SRR3624796	29173326	29156288	27644936	18895264	None	18 448 745	None	None
129	One-to-all	input	CHART (B2)	M. musculus	GSE82255	GSM2187198	SRR3624801	58433208	42682154	39731067	20542354	None	None	None	None
129	One-to-all	input	CHART (B2)	M. musculus	GSE82255	GSM2187199	SRR3624802	19145767	19127094	18250108	14034923	None	None	None	None
129	One-to-all	treatment	CHART (B2)	M. musculus	GSE82255	GSM2419789	SRR5086818	51450122	32827930	29493768	22138750	None	21 849 096	None	None
130	One-to-all	input	ChIRP (SNHG1)	H. sapiens	GSE85842	GSM2285451	SRR4045657	32460428	32268934	27991971	23702398	None	None	None	None
130	One-to-all	input	ChIRP (SNHG1)	H. sapiens	GSE85842	GSM2285452	SRR4045658	38861075	38594620	33618279	27484497	None	None	None	None
130	One-to-all	input	ChIRP (SNHG1)	H. sapiens	GSE85842	GSM2285453	SRR4045659	53772496	53628608	49788801	39134087	None	None	None	None
130	One-to-all	treatment	ChIRP (SNHG1)	H. sapiens	GSE85842	GSM2285442	SRR4045648	27839679	21128938	18237233	11406543	None	11 350 942	None	None
130	One-to-all	treatment	ChIRP (SNHG1)	H. sapiens	GSE85842	GSM2285443	SRR4045649	32733279	20249808	17153341	8287680	None	8 243 556	None	None
130	One-to-all	treatment	ChIRP (SNHG1)	H. sapiens	GSE85842	GSM2285444	SRR4045650	31330939	27061201	23849663	17802989	None	17 707 576	None	None
130	One-to-all	treatment	ChIRP (SNHG1)	H. sapiens	GSE85842	GSM2285445	SRR4045651	29058203	19750873	16941149	10252268	None	10 169 610	None	None
130	One-to-all	treatment	ChIRP (SNHG1)	H. sapiens	GSE85842	GSM2285446	SRR4045652	32720345	23139253	19653947	9166149	None	9 087 421	None	None
130	One-to-all	treatment	ChIRP (SNHG1)	H. sapiens	GSE85842	GSM2285447	SRR4045653	28845416	23383669	20216848	14767174	None	14 645 678	None	None
131	One-to-all	input	ChIRP (Eprn)	M. musculus	GSE90574	GSM2407084	SRR5058276	48776248	37902914	37071269	31889777	None	None	None	None
131	One-to-all	treatment	ChIRP (7SK)	M. musculus	GSE90574	GSM2407081	SRR5058273	37126403	17321001	16871193	13249041	None	13 198 184	None	None
132	One-to-all	input	ChIRP (Eprn)	M. musculus	GSE90574	GSM2407084	SRR5058276	48776248	37902914	37071269	31889777	None	None	None	None
132	One-to-all	treatment	ChIRP (Eprn)	M. musculus	GSE90574	GSM2407079	SRR5058271	62646657	34724330	33885269	26849041	None	26 769 559	None	None
132	One-to-all	treatment	ChIRP (Eprn)	M. musculus	GSE90574	GSM2407080	SRR5058272	42737736	27619836	26979184	22020868	None	21 950 549	None	None
133	One-to-all	input	ChIRP (ERV-9)	H. sapiens	GSE93282	GSM2449979	SRR5152322	23806351	23695184	22411129	15771112	None	None	None	None
133	One-to-all	treatment	ChIRP (ERV-9)	H. sapiens	GSE93282	GSM2449980	SRR5152323	16944658	16089068	13025061	1307139	None	1 294 988	None	None
133	One-to-all	treatment	ChIRP (ERV-9)	H. sapiens	GSE93282	GSM2449980	SRR5152324	53101590	45869397	25790301	4537535	None	4 494 820	None	None
133	One-to-all	treatment	ChIRP (ERV-9)	H. sapiens	GSE93282	GSM2449981	SRR5152325	10710828	10235745	8047509	445296	None	441 441	None	None
133	One-to-all	treatment	ChIRP (ERV-9)	H. sapiens	GSE93282	GSM2449981	SRR5152326	11558107	10643898	5482582	799084	None	795 529	None	None
134	One-to-all	input	ChIRP (Charme)	M. musculus	GSE94498	GSM2477128	SRR5228675	78269698	48154540	44615700	29526383	None	None	None	None
134	One-to-all	treatment	ChIRP (Charme)	M. musculus	GSE94498	GSM2477123	SRR5228673	63151326	3817815	3100477	978140	None	975 981	None	None
134	One-to-all	treatment	ChIRP (Charme)	M. musculus	GSE94498	GSM2477125	SRR5228674	60597480	3852253	3237778	1250095	None	1 245 348	None	None
135	One-to-all	input	ChIRP (alncRNA-EC7/Bloodlinc)	M. musculus	GSE97121	GSM2551941	SRR5381854	116392364	102042019	97500679	84692353	None	None	None	None
135	One-to-all	treatment	ChIRP (alncRNA-EC7/Bloodlinc)	M. musculus	GSE97121	GSM2551940	SRR5381853	103279644	62856846	60212880	50001544	None	49 934 647	None	None
135	One-to-all	treatment	ChIRP (alncRNA-EC7/Bloodlinc)	M. musculus	GSE97121	GSM2677563	SRR5725015	29506784	17741813	13391569	10374562	None	10 353 098	None	None
135	One-to-all	treatment	ChIRP (alncRNA-EC7/Bloodlinc)	M. musculus	GSE97121	GSM2677564	SRR5725016	53497486	25592239	17817222	11066619	None	11 046 755	None	None
136	One-to-all	input	ChIRP (MEG3)	M. musculus	GSE99798	GSM2652603	SRR5658394	51327516	46974380	43634230	36898566	None	None	None	None
136	One-to-all	treatment	ChIRP (MEG3)	M. musculus	GSE99798	GSM2652604	SRR5658395	32648019	13260584	11821070	4130784	None	4 116 716	None	None
136	One-to-all	treatment	ChIRP (MEG3)	M. musculus	GSE99798	GSM2652605	SRR5658396	22308023	4462414	3847875	1771320	None	1 764 114	None	None
137	One-to-all	input	CHART (Xist)	M. musculus	GSE107217	GSM2862873	SRR6312631	49614526	49206369	42558009	31512130	None	None	None	None
137	One-to-all	input	CHART (Xist)	M. musculus	GSE107217	GSM2862879	SRR6312637	42150709	40508916	36217859	26272437	None	None	None	None
137	One-to-all	treatment	CHART (Xist)	M. musculus	GSE107217	GSM2862874	SRR6312632	52022120	45786310	39516384	28371012	None	28 259 576	None	None
137	One-to-all	treatment	CHART (Xist)	M. musculus	GSE107217	GSM2862880	SRR6312638	29290055	28274718	25602753	18886965	None	18 766 104	None	None
138	One-to-all	input	CHART (Xist)	M. musculus	GSE107217	GSM2862876	SRR6312634	56302998	55874197	40615887	29379049	None	None	None	None
138	One-to-all	input	CHART (Xist)	M. musculus	GSE107217	GSM2862882	SRR6312640	28345716	28050781	25009007	18091411	None	None	None	None
138	One-to-all	treatment	CHART (Xist)	M. musculus	GSE107217	GSM2862877	SRR6312635	47530908	42083516	29493612	20367066	None	20 261 527	None	None
138	One-to-all	treatment	CHART (Xist)	M. musculus	GSE107217	GSM2862883	SRR6312641	40630079	38350712	34255341	24851837	None	24 643 969	None	None
139	One-to-all	treatment	ChIRP (HOTTIP)	H. sapiens	GSE114981	GSM3161929	SRR7226640	21604868	17678870	14952856	4824996	None	4 781 452	None	None
140	One-to-all	input	ChIRP (lnc-NR2F1)	H. sapiens	GSE115079	GSM3567436	SRR8451957	40641280	37055645	33214536	5904690	None	None	None	None
140	One-to-all	input	ChIRP (lnc-NR2F1)	H. sapiens	GSE115079	GSM3567445	SRR8451966	42414584	12941914	9381687	6675744	None	None	None	None
140	One-to-all	treatment	ChIRP (lnc-NR2F1)	H. sapiens	GSE115079	GSM3567428	SRR8451949	35855837	11366410	9271626	7382321	None	7 361 903	None	None
140	One-to-all	treatment	ChIRP (lnc-NR2F1)	H. sapiens	GSE115079	GSM3567437	SRR8451958	38553506	13145833	9607618	6625186	None	6 597 155	None	None
140	One-to-all	treatment	ChIRP (lnc-NR2F1)	H. sapiens	GSE115079	GSM3567429	SRR8451950	30722652	9818198	7936842	6597846	None	6 570 273	None	None
140	One-to-all	treatment	ChIRP (lnc-NR2F1)	H. sapiens	GSE115079	GSM3567438	SRR8451959	37242576	17985766	14322767	11396907	None	11 351 681	None	None
141	One-to-all	input	ChIRP (lnc-NR2F1)	H. sapiens	GSE115079	GSM3567436	SRR8451957	40641280	37055645	33214536	5904690	None	None	None	None
141	One-to-all	input	ChIRP (lnc-NR2F1)	H. sapiens	GSE115079	GSM3567445	SRR8451966	42414584	12941914	9381687	6675744	None	None	None	None
141	One-to-all	treatment	ChIRP (lnc-NR2F1)	H. sapiens	GSE115079	GSM3567432	SRR8451953	26478757	13511249	11668533	10126345	None	10 071 544	None	None
141	One-to-all	treatment	ChIRP (lnc-NR2F1)	H. sapiens	GSE115079	GSM3567441	SRR8451962	38319260	37298146	32396950	27294093	None	27 199 751	None	None
141	One-to-all	treatment	ChIRP (lnc-NR2F1)	H. sapiens	GSE115079	GSM3567433	SRR8451954	36933010	17577634	15217020	13342315	None	13 281 626	None	None
141	One-to-all	treatment	ChIRP (lnc-NR2F1)	H. sapiens	GSE115079	GSM3567442	SRR8451963	61449599	19007996	13754587	9709660	None	9 646 559	None	None
142	One-to-all	treatment	ChIRP (HOXBLINC)	M. musculus	GSE115096	GSM3728755	SRR8923464	17278086	16709749	14528800	10288062	None	10 255 251	None	None
143	One-to-all	input	CHART (Xist)	M. musculus	GSE116413	GSM3722610	SRR8902526	36525887	35512159	33738988	23655694	None	None	None	None
143	One-to-all	input	CHART (Xist)	M. musculus	GSE116413	GSM3722614	SRR8902530	49882962	46726749	29680998	21009688	None	None	None	None
143	One-to-all	treatment	CHART (Xist)	M. musculus	GSE116413	GSM3722611	SRR8902527	26443642	23318610	21553188	15428310	None	15 302 211	None	None
143	One-to-all	treatment	CHART (Xist)	M. musculus	GSE116413	GSM3722615	SRR8902531	54867733	41375077	22206979	16152758	None	16 051 273	None	None
144	One-to-all	input	CHART (Xist)	M. musculus	GSE116413	GSM3722612	SRR8902528	31456755	30552339	28210626	20012347	None	None	None	None
144	One-to-all	input	CHART (Xist)	M. musculus	GSE116413	GSM3722616	SRR8902532	48472747	46276530	29094526	20550719	None	None	None	None
144	One-to-all	treatment	CHART (Xist)	M. musculus	GSE116413	GSM3722613	SRR8902529	30890086	26264718	25130209	18113744	None	17 954 371	None	None
144	One-to-all	treatment	CHART (Xist)	M. musculus	GSE116413	GSM3722617	SRR8902533	53318223	35740728	19568319	13984716	None	13 866 404	None	None
145	One-to-all	treatment	ChIRP (Linc-ASEN)	H. sapiens	GSE128398	GSM3673641	SRR8735108	62403401	31958150	30302286	25623599	None	25 466 008	None	None
146	One-to-all	treatment	ChIRP (Malat1)	M. musculus	GSE134287	GSM3941421	SRR9685047	11105863	9787705	7869067	4587503	None	4 570 134	None	None
147	One-to-all	input	RAP-seq (Xist)	M. musculus	GSE46918	GSM1141175	SRR850628	9388970	8628979	7982828	5530262	None	None	None	None
147	One-to-all	treatment	RAP-seq (Xist)	M. musculus	GSE46918	GSM1141165	SRR850618	7908291	2483094	2020716	1329160	None	1 318 597	None	None	quality score has been lowered to 22
147	One-to-all	treatment	RAP-seq (Xist)	M. musculus	GSE46918	GSM1141170	SRR850623	5246459	2630989	2226373	1484755	None	1 471 967	None	None	quality score has been lowered to 22
148	One-to-all	input	RAP-seq (Xist)	M. musculus	GSE46918	GSM1141175	SRR850628	9388970	8628979	7982828	5530262	None	None	None	None
148	One-to-all	treatment	RAP-seq (Xist)	M. musculus	GSE46918	GSM1141166	SRR850619	8087797	3029996	2538642	1663783	None	1 646 652	None	None	quality score has been lowered to 22
148	One-to-all	treatment	RAP-seq (Xist)	M. musculus	GSE46918	GSM1141171	SRR850624	7876757	1964462	1562286	996083	None	987 179	None	None	quality score has been lowered to 22
149	One-to-all	input	RAP-seq (Xist)	M. musculus	GSE46918	GSM1141176	SRR850629	9460200	8134664	7452561	5528086	None	None	None	None
149	One-to-all	treatment	RAP-seq (Xist)	M. musculus	GSE46918	GSM1141167	SRR850620	7103610	5190159	4109571	3027698	None	3 016 137	None	None
149	One-to-all	treatment	RAP-seq (Xist)	M. musculus	GSE46918	GSM1141172	SRR850625	7806529	4999595	4232222	3141345	None	3 134 218	None	None
150	One-to-all	input	RAP-seq (Xist)	M. musculus	GSE46918	GSM1141177	SRR850630	10479264	10005934	9258522	6651061	None	None	None	None
150	One-to-all	treatment	RAP-seq (Xist)	M. musculus	GSE46918	GSM1141168	SRR850621	7035611	6202600	5427762	4001355	None	3 991 494	None	None
150	One-to-all	treatment	RAP-seq (Xist)	M. musculus	GSE46918	GSM1141173	SRR850626	7503326	6592937	5609781	4134453	None	4 126 554	None	None
151	One-to-all	input	RAP-seq (Xist)	M. musculus	GSE46918	GSM1141178	SRR850631	9609783	8548113	7859319	5610594	None	None	None	None
151	One-to-all	treatment	RAP-seq (Xist)	M. musculus	GSE46918	GSM1141169	SRR850622	7420496	7009137	5650789	4184481	None	4 178 132	None	None
151	One-to-all	treatment	RAP-seq (Xist)	M. musculus	GSE46918	GSM1141174	SRR850627	7200700	6623080	5697719	4207986	None	4 201 318	None	None
152	One-to-all	treatment	ChIRP (PCGEM1)	H. sapiens	GSE47807	GSM1159893	SRR892014	32909257	11272516	9721323	7441166	None	7 391 255	None	None
153	One-to-all	input	CHART (Xist)	M. musculus	GSE48649	GSM1182877	SRR927474	97531596	96829744	81886321	59955313	None	None	None	None
153	One-to-all	treatment	CHART (Xist)	M. musculus	GSE48649	GSM1182879	SRR927476	44814378	41303704	38453141	27882162	None	27 688 100	None	None
153	One-to-all	treatment	CHART (Xist)	M. musculus	GSE48649	GSM1182880	SRR927477	29674880	23754414	21613655	14924689	None	14 869 470	None	None
154	One-to-all	input	CHART (Xist)	M. musculus	GSE48649	GSM1182877	SRR927474	97531596	96829744	81886321	59955313	None	None	None	None
154	One-to-all	treatment	CHART (Xist)	M. musculus	GSE48649	GSM1182884	SRR927481	48246522	44309251	41898035	30679341	None	30 499 835	None	None
154	One-to-all	treatment	CHART (Xist)	M. musculus	GSE48649	GSM1182885	SRR927482	30925007	27084650	24926889	18394713	None	18 304 774	None	None
155	One-to-all	input	CHART (Xist)	M. musculus	GSE48649	GSM1182877	SRR927474	97531596	96829744	81886321	59955313	None	None	None	None
155	One-to-all	treatment	CHART (Xist)	M. musculus	GSE48649	GSM1182886	SRR927483	54381138	47233197	44036066	32026138	None	31 861 303	None	None
155	One-to-all	treatment	CHART (Xist)	M. musculus	GSE48649	GSM1182887	SRR927484	25684903	22613310	20972455	14764577	None	14 699 281	None	None
156	One-to-all	input	CHART (Xist)	M. musculus	GSE48649	GSM1182894	SRR927491	66766315	66336447	57241826	44894793	None	None	None	None
156	One-to-all	treatment	CHART (Xist)	M. musculus	GSE48649	GSM1182888	SRR927485	90746712	67947922	54522129	28403883	None	28 161 856	None	None	quality score has been lowered to 22
156	One-to-all	treatment	CHART (Xist)	M. musculus	GSE48649	GSM1182889	SRR927486	31808339	27476622	25056951	19833610	None	19 761 834	None	None
157	One-to-all	input	CHART (Xist)	M. musculus	GSE48649	GSM1182894	SRR927491	66766315	66336447	57241826	44894793	None	None	None	None
157	One-to-all	treatment	CHART (Xist)	M. musculus	GSE48649	GSM1182890	SRR927487	43791229	39347266	36803805	27111678	None	27 000 686	None	None
157	One-to-all	treatment	CHART (Xist)	M. musculus	GSE48649	GSM1182891	SRR927488	30855296	24925777	22730131	17216747	None	17 134 468	None	None
158	One-to-all	input	CHART (Xist)	M. musculus	GSE48649	GSM1182894	SRR927491	66766315	66336447	57241826	44894793	None	None	None	None
158	One-to-all	treatment	CHART (Xist)	M. musculus	GSE48649	GSM1216701	SRR957778	40471751	39119769	36561253	10433580	None	10 355 075	None	None
158	One-to-all	treatment	CHART (Xist)	M. musculus	GSE48649	GSM1216702	SRR957779	32111653	27849692	25637726	20310405	None	20 260 721	None	None
159	One-to-all	treatment	ChIRP (7SK)	H. sapiens	GSE51633	GSM1249900	SRR1016014	23150198	18121610	2543175	1223664	None	1 214 522	None	None	quality score has been lowered to 22
160	One-to-all	input	CHART (NEAT1, MALAT1)	H. sapiens	GSE58444	GSM1411223	SRR1386247	25576905	25475680	19712639	17437758	None	None	None	None
160	One-to-all	input	CHART (NEAT1, MALAT1)	H. sapiens	GSE58444	GSM1411230	SRR1386254	19555945	19480665	15177786	13436978	None	None	None	None
160	One-to-all	treatment	CHART (NEAT1, MALAT1)	H. sapiens	GSE58444	GSM1411217	SRR1386241	26171173	25382673	19317769	17154654	None	17 041 888	None	None
160	One-to-all	treatment	CHART (NEAT1, MALAT1)	H. sapiens	GSE58444	GSM1411224	SRR1386248	32058229	30607550	23665316	21071670	None	20 934 345	None	None
161	One-to-all	input	CHART (NEAT1, MALAT1)	H. sapiens	GSE58444	GSM1411223	SRR1386247	25576905	25475680	19712639	17437758	None	None	None	None
161	One-to-all	input	CHART (NEAT1, MALAT1)	H. sapiens	GSE58444	GSM1411230	SRR1386254	19555945	19480665	15177786	13436978	None	None	None	None
161	One-to-all	treatment	CHART (NEAT1, MALAT1)	H. sapiens	GSE58444	GSM1411218	SRR1386242	65579892	62009629	47705120	42658910	None	42 380 549	None	None
161	One-to-all	treatment	CHART (NEAT1, MALAT1)	H. sapiens	GSE58444	GSM1411225	SRR1386249	30503170	29188196	22529268	20041718	None	19 909 630	None	None
162	One-to-all	input	CHART (NEAT1, MALAT1)	H. sapiens	GSE58444	GSM1411223	SRR1386247	25576905	25475680	19712639	17437758	None	None	None	None
162	One-to-all	input	CHART (NEAT1, MALAT1)	H. sapiens	GSE58444	GSM1411230	SRR1386254	19555945	19480665	15177786	13436978	None	None	None	None
162	One-to-all	treatment	CHART (NEAT1, MALAT1)	H. sapiens	GSE58444	GSM1411220	SRR1386244	19963590	19462785	14777882	13171293	None	13 083 771	None	None
162	One-to-all	treatment	CHART (NEAT1, MALAT1)	H. sapiens	GSE58444	GSM1411227	SRR1386251	27134047	26397600	20318785	2077808	None	2 063 227	None	None
163	One-to-all	input	CHART (NEAT1, MALAT1)	H. sapiens	GSE58444	GSM1411223	SRR1386247	25576905	25475680	19712639	17437758	None	None	None	None
163	One-to-all	input	CHART (NEAT1, MALAT1)	H. sapiens	GSE58444	GSM1411230	SRR1386254	19555945	19480665	15177786	13436978	None	None	None	None
163	One-to-all	treatment	CHART (NEAT1, MALAT1)	H. sapiens	GSE58444	GSM1411221	SRR1386245	19730761	19212970	14689789	13071729	None	12 983 414	None	None
163	One-to-all	treatment	CHART (NEAT1, MALAT1)	H. sapiens	GSE58444	GSM1411228	SRR1386252	30308645	28983888	22340157	19908712	None	19 775 464	None	None
164	One-to-all	input	CHART (NEAT1, MALAT1)	H. sapiens	GSE58444	GSM1411237	SRR1386261	30493811	30403950	23596572	20059364	None	None	None	None
164	One-to-all	input	CHART (NEAT1, MALAT1)	H. sapiens	GSE58444	GSM1411244	SRR1386268	27796735	27661162	24981249	22000313	None	None	None	None
164	One-to-all	treatment	CHART (NEAT1, MALAT1)	H. sapiens	GSE58444	GSM1411231	SRR1386255	27696272	26936558	20831933	17859809	None	17 745 496	None	None
164	One-to-all	treatment	CHART (NEAT1, MALAT1)	H. sapiens	GSE58444	GSM1411238	SRR1386262	32972737	31098748	28051484	24987546	None	24 826 853	None	None
165	One-to-all	input	CHART (NEAT1, MALAT1)	H. sapiens	GSE58444	GSM1411237	SRR1386261	30493811	30403950	23596572	20059364	None	None	None	None
165	One-to-all	input	CHART (NEAT1, MALAT1)	H. sapiens	GSE58444	GSM1411244	SRR1386268	27796735	27661162	24981249	22000313	None	None	None	None
165	One-to-all	treatment	CHART (NEAT1, MALAT1)	H. sapiens	GSE58444	GSM1411232	SRR1386256	30940111	29216380	22446747	19180300	None	19 057 950	None	None
165	One-to-all	treatment	CHART (NEAT1, MALAT1)	H. sapiens	GSE58444	GSM1411239	SRR1386263	38112659	36175536	33013025	29505876	None	29 316 362	None	None
166	One-to-all	input	CHART (NEAT1, MALAT1)	H. sapiens	GSE58444	GSM1411237	SRR1386261	30493811	30403950	23596572	20059364	None	None	None	None
166	One-to-all	input	CHART (NEAT1, MALAT1)	H. sapiens	GSE58444	GSM1411244	SRR1386268	27796735	27661162	24981249	22000313	None	None	None	None
166	One-to-all	treatment	CHART (NEAT1, MALAT1)	H. sapiens	GSE58444	GSM1411234	SRR1386258	20570039	20163662	15538753	13332759	None	13 245 896	None	None
166	One-to-all	treatment	CHART (NEAT1, MALAT1)	H. sapiens	GSE58444	GSM1411241	SRR1386265	28103828	26808979	23957772	21383942	None	21 245 002	None	None
167	One-to-all	input	CHART (NEAT1, MALAT1)	H. sapiens	GSE58444	GSM1411237	SRR1386261	30493811	30403950	23596572	20059364	None	None	None	None
167	One-to-all	input	CHART (NEAT1, MALAT1)	H. sapiens	GSE58444	GSM1411244	SRR1386268	27796735	27661162	24981249	22000313	None	None	None	None
167	One-to-all	treatment	CHART (NEAT1, MALAT1)	H. sapiens	GSE58444	GSM1411235	SRR1386259	35288241	33867208	25958594	22191918	None	22 048 264	None	None
167	One-to-all	treatment	CHART (NEAT1, MALAT1)	H. sapiens	GSE58444	GSM1411242	SRR1386266	24400343	23037333	20611589	18360325	None	18 238 091	None	None
168	One-to-all	input	CHART (NEAT1, MALAT1)	H. sapiens	GSE58444	GSM1411251	SRR1386275	26458398	26291819	23707884	20154669	None	None	None	None
168	One-to-all	input	CHART (NEAT1, MALAT1)	H. sapiens	GSE58444	GSM1411258	SRR1386282	26272647	26162393	20365311	18041690	None	None	None	None
168	One-to-all	treatment	CHART (NEAT1, MALAT1)	H. sapiens	GSE58444	GSM1411245	SRR1386269	32962940	29243509	26330938	23348366	None	23 204 023	None	None
168	One-to-all	treatment	CHART (NEAT1, MALAT1)	H. sapiens	GSE58444	GSM1411252	SRR1386276	27290205	26186947	20111180	17996608	None	17 887 081	None	None
169	One-to-all	input	CHART (NEAT1, MALAT1)	H. sapiens	GSE58444	GSM1411251	SRR1386275	26458398	26291819	23707884	20154669	None	None	None	None
169	One-to-all	input	CHART (NEAT1, MALAT1)	H. sapiens	GSE58444	GSM1411258	SRR1386282	26272647	26162393	20365311	18041690	None	None	None	None
169	One-to-all	treatment	CHART (NEAT1, MALAT1)	H. sapiens	GSE58444	GSM1411246	SRR1386270	31220674	28312310	25506123	22705563	None	22 561 047	None	None
169	One-to-all	treatment	CHART (NEAT1, MALAT1)	H. sapiens	GSE58444	GSM1411253	SRR1386277	34698277	33252534	25853066	23267253	None	23 127 880	None	None
170	One-to-all	input	CHART (NEAT1, MALAT1)	H. sapiens	GSE58444	GSM1411251	SRR1386275	26458398	26291819	23707884	20154669	None	None	None	None
170	One-to-all	input	CHART (NEAT1, MALAT1)	H. sapiens	GSE58444	GSM1411258	SRR1386282	26272647	26162393	20365311	18041690	None	None	None	None
170	One-to-all	treatment	CHART (NEAT1, MALAT1)	H. sapiens	GSE58444	GSM1411248	SRR1386272	24068543	22294565	19974058	17520630	None	17 410 792	None	None
170	One-to-all	treatment	CHART (NEAT1, MALAT1)	H. sapiens	GSE58444	GSM1411255	SRR1386279	25229425	24158753	18405781	16472540	None	16 373 834	None	None
171	One-to-all	input	CHART (NEAT1, MALAT1)	H. sapiens	GSE58444	GSM1411251	SRR1386275	26458398	26291819	23707884	20154669	None	None	None	None
171	One-to-all	input	CHART (NEAT1, MALAT1)	H. sapiens	GSE58444	GSM1411258	SRR1386282	26272647	26162393	20365311	18041690	None	None	None	None
171	One-to-all	treatment	CHART (NEAT1, MALAT1)	H. sapiens	GSE58444	GSM1411249	SRR1386273	30575459	28448493	25690077	22848764	None	22 708 988	None	None
171	One-to-all	treatment	CHART (NEAT1, MALAT1)	H. sapiens	GSE58444	GSM1411256	SRR1386280	30358308	28721385	21829307	19513898	None	19 396 888	None	None
172	One-to-all	input	CHART (NEAT1, MALAT1)	H. sapiens	GSE58444	GSM1411265	SRR1386289	30412558	30263573	27491791	23238262	None	None	None	None
172	One-to-all	input	CHART (NEAT1, MALAT1)	H. sapiens	GSE58444	GSM1411272	SRR1386296	23623280	23526860	21267172	18744013	None	None	None	None
172	One-to-all	treatment	CHART (NEAT1, MALAT1)	H. sapiens	GSE58444	GSM1411259	SRR1386283	29798660	27469226	24597881	21774390	None	21 638 758	None	None
172	One-to-all	treatment	CHART (NEAT1, MALAT1)	H. sapiens	GSE58444	GSM1411266	SRR1386290	29568116	27741000	24890020	22227090	None	22 100 098	None	None
173	One-to-all	input	CHART (NEAT1, MALAT1)	H. sapiens	GSE58444	GSM1411265	SRR1386289	30412558	30263573	27491791	23238262	None	None	None	None
173	One-to-all	input	CHART (NEAT1, MALAT1)	H. sapiens	GSE58444	GSM1411272	SRR1386296	23623280	23526860	21267172	18744013	None	None	None	None
173	One-to-all	treatment	CHART (NEAT1, MALAT1)	H. sapiens	GSE58444	GSM1411260	SRR1386284	32300956	29758794	26885489	23749714	None	23 599 961	None	None
173	One-to-all	treatment	CHART (NEAT1, MALAT1)	H. sapiens	GSE58444	GSM1411267	SRR1386291	35696424	34391248	31202777	28081452	None	27 921 344	None	None
174	One-to-all	input	CHART (NEAT1, MALAT1)	H. sapiens	GSE58444	GSM1411265	SRR1386289	30412558	30263573	27491791	23238262	None	None	None	None
174	One-to-all	input	CHART (NEAT1, MALAT1)	H. sapiens	GSE58444	GSM1411272	SRR1386296	23623280	23526860	21267172	18744013	None	None	None	None
174	One-to-all	treatment	CHART (NEAT1, MALAT1)	H. sapiens	GSE58444	GSM1411262	SRR1386286	30360577	28173467	25197941	22261488	None	22 121 846	None	None
174	One-to-all	treatment	CHART (NEAT1, MALAT1)	H. sapiens	GSE58444	GSM1411269	SRR1386293	33456233	32334692	28718466	25724943	None	25 569 196	None	None
175	One-to-all	input	CHART (NEAT1, MALAT1)	H. sapiens	GSE58444	GSM1411265	SRR1386289	30412558	30263573	27491791	23238262	None	None	None	None
175	One-to-all	input	CHART (NEAT1, MALAT1)	H. sapiens	GSE58444	GSM1411272	SRR1386296	23623280	23526860	21267172	18744013	None	None	None	None
175	One-to-all	treatment	CHART (NEAT1, MALAT1)	H. sapiens	GSE58444	GSM1411263	SRR1386287	30305347	26210632	23381570	20614914	None	20 488 115	None	None
175	One-to-all	treatment	CHART (NEAT1, MALAT1)	H. sapiens	GSE58444	GSM1411270	SRR1386294	35967993	34059473	30492754	27267843	None	27 109 347	None	None
176	One-to-all	input	CHART (Xist)	M. musculus	GSE99991	GSM2667250	SRR5681015	27543709	27089791	25434911	20572931	None	None	None	None
176	One-to-all	input	CHART (Xist)	M. musculus	GSE99991	GSM2667256	SRR5681021	41158842	40248363	36116940	28358433	None	None	None	None
176	One-to-all	treatment	CHART (Xist)	M. musculus	GSE99991	GSM2667251	SRR5681016	29259853	22424183	21036540	11463862	None	11 424 577	None	None
176	One-to-all	treatment	CHART (Xist)	M. musculus	GSE99991	GSM2667257	SRR5681022	40270670	34980116	31374200	22832096	None	22 682 039	None	None
177	One-to-all	input	CHART (Xist)	M. musculus	GSE99991	GSM2667259	SRR5681024	34148834	33462869	30214151	23599327	None	None	None	None
177	One-to-all	input	CHART (Xist)	M. musculus	GSE99991	GSM2667253	SRR5681018	31967516	31337275	29293787	23520007	None	None	None	None
177	One-to-all	treatment	CHART (Xist)	M. musculus	GSE99991	GSM2667254	SRR5681019	33453938	22939211	21329392	13846908	None	13 792 721	None	None
177	One-to-all	treatment	CHART (Xist)	M. musculus	GSE99991	GSM2667260	SRR5681025	36010950	31229718	28052100	21293662	None	21 145 538	None	None
178	One-to-all	treatment	ChIRP (HOXBLINC)	M. musculus	GSE115096	GSM3728756	SRR8923465	12037144	11755062	10254180	7567880	None	7 548 171	None	None
179	One-to-all	treatment	ChIRP (HOXBLINC)	M. musculus	GSE115096	GSM4710565	SRR12387640	45822958	41417899	36728099	15276747	None	15 195 799	None	None
180	One-to-all	treatment	ChIRP (HOXBLINC)	M. musculus	GSE115096	GSM4710566	SRR12387641	41031621	27992287	26486451	7961049	None	7 858 777	None	None
181	One-to-all	treatment	ChIRP (Malat1)	M. musculus	GSE134287	GSM3941425	SRR9685051	9046302	7896419	6371660	3537609	None	3 512 230	None	None
182	One-to-all	treatment	ChIRP (Malat1)	M. musculus	GSE134287	GSM3941429	SRR9685055	11325225	10257557	8831561	5781360	None	5 761 275	None	None
183	One-to-all	treatment	ChIRP (Malat1)	M. musculus	GSE134287	GSM3941430	SRR9685056	11682961	10565824	9167719	5771339	None	5 740 026	None	None
184	One-to-all	treatment	ChIRP (PCGEM1)	H. sapiens	GSE47807	GSM1159894	SRR892015	38143213	18918107	16923984	13786807	None	13 704 457	None	None
185	One-to-all	treatment	ChIRP (7SK)	H. sapiens	GSE51633	GSM1249901	SRR1016015	49964050	23053411	2608132	941764	None	933 760	None	None	quality score has been lowered to 22
185	One-to-all	treatment	ChIRP (7SK)	H. sapiens	GSE51633	GSM1249902	SRR1016016	27113340	15399800	1955313	791090	None	785 024	None	None	quality score has been lowered to 22
186	One-to-all	treatment	ChIRP (7SK)	H. sapiens	GSE51633	GSM1249903	SRR1016017	17291541	15760912	2757528	1496421	None	1 484 019	None	None	quality score has been lowered to 22
186	One-to-all	treatment	ChIRP (7SK)	H. sapiens	GSE51633	GSM1249904	SRR1016018	22185681	19219142	3318758	1673396	None	1 659 160	None	None	quality score has been lowered to 22
187	One-to-all	input	CHART (Xist)	M. musculus	GSE80510	GSM2128918	SRR3407181	48552658	47574233	25051578	20262054	None	None	None	None
187	One-to-all	treatment	CHART (Xist)	M. musculus	GSE80510	GSM2128918	SRR3407182	20029690	17756115	11450222	8103048	None	8 066 005	None	None	quality score has been lowered to 22
188	One-to-all	input	CHART (Xist)	M. musculus	GSE80510	GSM2128919	SRR3407184	11990846	10769074	8326713	6513571	None	None	None	None
188	One-to-all	input	CHART (Xist)	M. musculus	GSE80510	GSM2128919	SRR4237769	11990821	10769052	8326697	6513559	None	None	None	None
188	One-to-all	input	CHART (Xist)	M. musculus	GSE80510	GSM2128919	SRR4098543	11990821	10769052	8326697	6513559	None	None	None	None
188	One-to-all	treatment	CHART (Xist)	M. musculus	GSE80510	GSM2128919	SRR3407183	11939436	6594605	4568079	2038070	None	2 017 407	None	None
188	One-to-all	treatment	CHART (Xist)	M. musculus	GSE80510	GSM2128919	SRR4237762	11939294	6594511	4568013	2038067	None	2 017 404	None	None
188	One-to-all	treatment	CHART (Xist)	M. musculus	GSE80510	GSM2128919	SRR4098541	11939295	6594511	4568013	2038067	None	2 017 404	None	None
189	One-to-all	input	CHART (Xist)	M. musculus	GSE80510	GSM2128921	SRR3407188	60031414	59030299	30280413	24420816	None	None	None	None
189	One-to-all	treatment	CHART (Xist)	M. musculus	GSE80510	GSM2128921	SRR3407187	11603717	10147369	6054502	1662334	None	1 638 568	None	None	quality score has been lowered to 22
190	One-to-all	input	CHART (Xist)	M. musculus	GSE80510	GSM2128923	SRR3407190	29949848	29289452	26078410	20515986	None	None	None	None
190	One-to-all	treatment	CHART (Xist)	M. musculus	GSE80510	GSM2128922	SRR3407189	15739868	13700424	12020337	9815307	None	9 808 294	None	None
191	One-to-all	input	CHART (Xist)	M. musculus	GSE107217	GSM3517948	SRR8330976	33358367	32898779	29900817	21712825	None	None	None	None
191	One-to-all	treatment	CHART (Xist)	M. musculus	GSE107217	GSM3517949	SRR8330977	29270201	14539374	12536569	8706622	None	8 693 650	None	None
191	One-to-all	treatment	CHART (Xist)	M. musculus	GSE107217	GSM3517951	SRR8330979	37192586	20408615	16882634	11787520	None	11 746 953	None	None
192	One-to-all	input	CHART (Xist)	M. musculus	GSE107217	GSM3517952	SRR8330980	33849610	33344042	30110299	20048155	None	None	None	None
192	One-to-all	treatment	CHART (Xist)	M. musculus	GSE107217	GSM3517953	SRR8330981	35712055	24536216	21535920	15759367	None	15 743 008	None	None
192	One-to-all	treatment	CHART (Xist)	M. musculus	GSE107217	GSM3517955	SRR8330983	33606334	11189727	9014611	5833659	None	5 809 473	None	None
193	One-to-all	input	ChOP (MEG3)	H. sapiens	ERR652	ERR652840	ERR652840	21615528	20980011	16969562	9914596	None	None	None	None
193	One-to-all	treatment	ChOP (MEG3)	H. sapiens	ERR652	ERR652841	ERR652841	5759775	4573779	3390354	1009486	None	1005982	None	None
194	One-to-all	input	ChIRP (lincDUSP)	H. sapiens	GSE112602	GSM3073888	SRR6927355	3417	3379	3066	1859	None	None	None	None
194	One-to-all	treatment	ChIRP (lincDUSP)	H. sapiens	GSE112602	GSM3073889	SRR6927356	3568	3505	3205	1884	None	1 861	None	None
195	One-to-all	input	RAP-seq (Xist)	M. musculus	GSE46918	GSM1141192	SRR850645	3796081	3671866	3148699	2076948	None	None	None	None	quality score has been lowered to 22
195	One-to-all	treatment	RAP-seq (Xist)	M. musculus	GSE46918	GSM1141197	SRR850650	6506467	3320092	2778795	1816289	None	1 810 636	None	None	quality score has been lowered to 22
196	One-to-all	input	ChIRP (Evx1as)	M. musculus	GSE70420	GSM2097551	SRR3286550	11211639	10701552	10134007	92221	None	None	None	None
196	One-to-all	treatment	ChIRP (Evx1as)	M. musculus	GSE70420	GSM2097552	SRR3286551	6594627	5738431	5397951	52785	None	52 617	None	None
197	One-to-all	input	CHART (Xist)	M. musculus	GSE48649	GSM1182894	SRR927491	66766315	66336447	57241826	44894793	None	None	None	None
197	One-to-all	treatment	CHART (Xist)	M. musculus	GSE48649	GSM1182892	SRR927489	213992698	198183944	170605209	129678822	None	128 479 085	None	None
197	One-to-all	treatment	CHART (Xist)	M. musculus	GSE48649	GSM1182893	SRR927490	53682809	50553150	43134383	13107242	None	13 001 246	None	None
198	One-to-all	input	RAP (Firre)	M. musculus	GSE45157	Input-Dilution	provided by the authors	96705266	28383277	19031527	6563473	None	None	None	None
198	One-to-all	input	RAP (Firre)	M. musculus	GSE45157	Ultra-11min-Dilution-R1	provided by the authors	33900830	22524535	21750043	12862530	None	None	None	None
198	One-to-all	treatment	RAP (Firre)	M. musculus	GSE45157	Firre-6wash	provided by the authors	16316432	14175483	11208133	3627851	None	3624616	None	None
198	One-to-all	treatment	RAP (Firre)	M. musculus	GSE45157	Ultra-Firre-R1	provided by the authors	19657828	8889467	8507683	3644654	None	3641938	None	None
199	One-to-all	input	RAP (Hdac2)	M. musculus	GSE55914	GSM1348375	SRR1193483	20056602	19852373	19276475	14751647	None	None	None	None
199	One-to-all	treatment	RAP (Hdac2)	M. musculus	GSE55914	GSM1348374	SRR1193482	8590729	2400558	1434288	210921	None	209 707	None	None
200	One-to-all	input	ChIRP (SRA)	H. sapiens	GSE58641	GSM1415924	SRR1425235	279127885	265274235	147774007	94397143	None	None	None	None
200	One-to-all	input	ChIRP (SRA)	H. sapiens	GSE58641	GSM1415924	SRR1425236	276432655	263014833	148606936	94794245	None	None	None	None
200	One-to-all	input	ChIRP (SRA)	H. sapiens	GSE58641	GSM1415924	SRR1425237	277998420	266825746	153043930	93596677	None	None	None	None	quality score has been lowered to 22
200	One-to-all	treatment	ChIRP (SRA)	H. sapiens	GSE58641	GSM1415922	SRR1425229	297394120	267938542	169381872	137276785	None	136 975 695	None	None
200	One-to-all	treatment	ChIRP (SRA)	H. sapiens	GSE58641	GSM1415922	SRR1425230	299283499	269810752	169060396	137938230	None	137 633 957	None	None
200	One-to-all	treatment	ChIRP (SRA)	H. sapiens	GSE58641	GSM1415922	SRR1425231	298648630	267537576	172014728	141024375	None	140 719 030	None	None
