# Supplementary material for: RNA-Chrom: a manually curated analytical database of RNA–chromatin interactome
Source: Database (Oxford). 2023 Apr 24;2023:baad025. doi: 10.1093/database/baad025 (PMC10205464; doi:10.1093/database/baad025)
Supplement: baad025_Supp [file baad025_supp.zip › baad025_Supp/Supplementary-table-2.xlsx]

## Sheet: Table 2
Supplementary Table 2. Database content.
Exp.ID — unique identifier of the corresponding RNA-chromatin interaction experiment in the database.
Method — name of the experimental protocol used to obtain the data.
RNA name (RNA-Chrom DB) — unique RNA name used in the database.
RNA type — taken from the corresponding gene annotation.
Number of peaks (article) — number of genome regions statistically significantly enriched in contacts of the RNA of interest with chromatin, which was obtained in the article.
Number of peaks (MACS2) — number of genome regions statistically significantly enriched in contacts of the RNA of interest with chromatin, which was obtained by us using the MACS2 program (more details in the section "Contacts normalization").
Reads in peaks (% of BlackList step) — number of reads (not-normalized contacts) that intersect the MACS2 peaks in the corresponding experiment. The percentage of "Reads in peaks" of the total number of reads that passed the last processing step (BlackList) is indicated in brackets.
Cell line — the cell line on which the experiment was performed.
Cell type / Tissue — the cell type / tissue on which the experiment was performed.
Exp.description — additional step in the experimental protocol.
RNA name (gencode v35) — RNA name used in GENCODE gene annotation.
RNA name (article) — RNA name used in the article.
Synonyms — alternative names for the RNA (the gene that encodes it.)
Full name RNA — the full name is taken either from the article or from"GeneCards: The Human Gene Database" (for human RNAs) /"Mouse Genome Informatics" (for mouse RNAs).
Crosslinking agent — fixes RNA-DNA interactions.
Year of publication of the article.
GSM — samples.
GSE — the NCBI GEO accession number for RNA-chromatin data reported in this paper.
Processing protocol — is usually "default", but may have small changes in special cases.
Library layout of RNA-chromatin data.
Genome version — assembly version of the genome to which the reads were mapped.
Exp.ID	Data type	Method	RNA name (RNA-Chrom DB)	RNA type	Number of peaks (article)	Number of peaks (MACS2)	Reads in peaks (% of BlackList step)	Cell line	Cell type / Tissue	Exp.description	Organism	RNA name (gencode v35)	RNA name (article)	Synonyms	Full name	Crosslinking agent	Year	Article	DOI	GSM	GSE	Processing protocol	Library layout	Genome version
16	All-to-all	RADICL	None	None	None	None	None	mES R08	male mouse embryonic stem cells	treatment: proteinase K (NPM)	Mus musculus	None	None	None	None	formaldehyde	2020	RADICL-seq identifies general and cell type-specific principles of genome-wide RNA-chromatin interactions	10.1038/s41467-020-14337-6	GSM3852776; GSM3852777; GSM3852778; GSM3852779; GSM3852780; GSM3852781	GSE132192	default	SINGLE	mm10 p6
15	All-to-all	RADICL	None	None	None	None	None	mES R08	male mouse embryonic stem cells	2% formaldehyde	Mus musculus	None	None	None	None	formaldehyde	2020	RADICL-seq identifies general and cell type-specific principles of genome-wide RNA-chromatin interactions	10.1038/s41467-020-14337-6	GSM3852766; GSM3852767; GSM3852768; GSM3852769; GSM3852770; GSM3852771	GSE132192	default	SINGLE	mm10 p6
14	All-to-all	RADICL	None	None	None	None	None	mES R08	male mouse embryonic stem cells	1% formaldehyde	Mus musculus	None	None	None	None	formaldehyde	2020	RADICL-seq identifies general and cell type-specific principles of genome-wide RNA-chromatin interactions	10.1038/s41467-020-14337-6	GSM3852760; GSM3852761; GSM3852762; GSM3852763; GSM3852764; GSM3852765	GSE132192	default	SINGLE	mm10 p6
13	All-to-all	RADICL	None	None	None	None	None	mOPC	mouse oligodendrocyte progenitor cells	treatment: proteinase K (NPM)	Mus musculus	None	None	None	None	formaldehyde	2020	RADICL-seq identifies general and cell type-specific principles of genome-wide RNA-chromatin interactions	10.1038/s41467-020-14337-6	GSM3852788; GSM3852789; GSM3852790; GSM3852791	GSE132192	default	SINGLE	mm10 p6
12	All-to-all	RADICL	None	None	None	None	None	mES R08	male mouse embryonic stem cells	treatment: actinomycin D for 4 h	Mus musculus	None	None	None	None	formaldehyde	2020	RADICL-seq identifies general and cell type-specific principles of genome-wide RNA-chromatin interactions	10.1038/s41467-020-14337-6	GSM3852772; GSM3852773; GSM3852774; GSM3852775	GSE132192	default	SINGLE	mm10 p6
11	All-to-all	RADICL	None	None	None	None	None	mOPC	mouse oligodendrocyte progenitor cells	None	Mus musculus	None	None	None	None	formaldehyde	2020	RADICL-seq identifies general and cell type-specific principles of genome-wide RNA-chromatin interactions	10.1038/s41467-020-14337-6	GSM3852782; GSM3852783; GSM3852784; GSM3852785; GSM3852786; GSM3852787	GSE132192	default	SINGLE	mm10 p6
10	All-to-all	Red-C	None	None	None	None	None	K562	female chronic myelogenous leukemia cell line	None	Homo sapiens	None	None	None	None	formaldehyde	2020	Studying RNA-DNA interactome by Red-C identifies noncoding RNAs associated with various chromatin types and reveals transcription dynamics	10.1093/nar/gkaa457	GSM4041593; GSM4041591; GSM4041595	GSE136141	default	PAIRED	hg38 p13
9	All-to-all	Red-C	None	None	None	None	None	fibroblasts	normal human skin fibroblasts (female 46XX)	None	Homo sapiens	None	None	None	None	formaldehyde	2020	Studying RNA-DNA interactome by Red-C identifies noncoding RNAs associated with various chromatin types and reveals transcription dynamics	10.1093/nar/gkaa457	GSM4041589; GSM4041588; GSM4041590	GSE136141	default	PAIRED	hg38 p13
8	All-to-all	GRID	None	None	None	None	None	MDA-MB-231 (HTB-26 ATCC)	breast cancer cells	None	Homo sapiens	None	None	None	None	disuccinimidyl glutarate & formaldehyde	2017	GRID-seq reveals the global RNA-chromatin interactome	10.1038/nbt.3968	GSM2188866; GSM2188867	GSE82312	default	SINGLE	hg38 p13
7	All-to-all	GRID	None	None	None	None	None	MM.1S	multiple myeloma cells	None	Homo sapiens	None	None	None	None	disuccinimidyl glutarate & formaldehyde	2017	GRID-seq reveals the global RNA-chromatin interactome	10.1038/nbt.3968	GSM2188868; GSM2188869	GSE82312	default	SINGLE	hg38 p13
6	All-to-all	GRID	None	None	None	None	None	mES	mouse embryonic stem cells	None	Mus musculus	None	None	None	None	disuccinimidyl glutarate & formaldehyde	2017	GRID-seq reveals the global RNA-chromatin interactome	10.1038/nbt.3968	GSM2396700; GSM2396701	GSE82312	default	SINGLE	mm10 p6
5	All-to-all	iMARGI	None	None	None	None	None	HUVEC	human umbilical vein endothelial cells	treatment: combining high glucose (to mimic hyperglycemia) and TNFalpha (to mimic inflammation) for 3 days	Homo sapiens	None	None	None	None	formaldehyde	2020	Stress-induced RNA–chromatin interactions promote endothelial dysfunction	10.1038/s41467-020-18957-w	GSM4006841	GSE135357	default	PAIRED	hg38 p13
4	All-to-all	iMARGI	None	None	None	None	None	HUVEC	human umbilical vein endothelial cells	treatment: combining high glucose (to mimic hyperglycemia) and TNFalpha (to mimic inflammation) for 7 days	Homo sapiens	None	None	None	None	formaldehyde	2020	Stress-induced RNA–chromatin interactions promote endothelial dysfunction	10.1038/s41467-020-18957-w	GSM4006842; GSM4729223	GSE135357	default	PAIRED	hg38 p13
3	All-to-all	iMARGI	None	None	None	None	None	HUVEC	human umbilical vein endothelial cells	osmotic control (25 mM mannitol)	Homo sapiens	None	None	None	None	formaldehyde	2020	Stress-induced RNA–chromatin interactions promote endothelial dysfunction	10.1038/s41467-020-18957-w	GSM4006840; GSM4729222	GSE135357	default	PAIRED	hg38 p13
2	All-to-all	iMARGI	None	None	None	None	None	HEK293T	Unknown	None	Homo sapiens	None	None	None	None	formaldehyde	2019	Genome-wide colocalization of RNA-DNA interactions and fusion RNA pairs	10.1073/pnas.1819788116	GSM3478205	GSE122690	default	PAIRED	hg38 p13
1	All-to-all	iMARGI	None	None	None	None	None	HFFc6	human foreskin fibroblast cell line immortalized by infection with retroviral constrcuts that expressed the hTERT open reading frame	None	Homo sapiens	None	None	None	None	formaldehyde	2019	Genome-wide colocalization of RNA-DNA interactions and fusion RNA pairs	10.1073/pnas.1819788116	GSM3478206	GSE122690	default	PAIRED	hg38 p13
200	One-to-all	ChIRP	SRA1	protein coding	7899	4025	335896 (0.1%)	NTERA2 pluripotent stem cell line	Unknown	None	Homo sapiens	SRA1	SRA	NR_045587.1	Steroid Receptor RNA Activator 1	glutaraldehyde	2015	Association of the Long Non-coding RNA Steroid Receptor RNA Activator (SRA) with TrxG and PRC2 Complexes	10.1371/journal.pgen.1005615	GSM1415922; GSM1415924	GSE58641	some GSMs; due to their low quality; were trimmed with other parameters: SLIDINGWINDOW:5:22 LEADING:22 MINLEN:14	SINGLE	hg38 p13
199	One-to-all	RAP	Hdac2	protein coding	None	16782	37915 (18.1%)	V6.5 ES	embryonic stem cells	None	Mus musculus	Hdac2	Hdac2	D10Wsu179e; Yy1bp	histone deacetylase 2	disuccinimidyl glutarate & formaldehyde	2014	RNA-RNA Interactions Enable Specific Targeting of Noncoding RNAs to Nascent Pre-mRNAs and Chromatin Sites	10.1016/j.cell.2014.08.018	GSM1348374; GSM1348375	GSE55914	default	PAIRED	mm10 p6
198	One-to-all	RAP	Firre	processed transcript	None	28064	585505 (8.1%)	ES	male embryonic stem cells	None	Mus musculus	Firre	Firre	None	functional intergenic repeating RNA element	formaldehyde	2014	Topological organization of multichromosomal regions by the long intergenic noncoding RNA Firre	10.1038/nsmb.2764	Input-Dilution; Ultra-11min-Dilution-R1; Ultra-Firre-R1; Firre-6wash	GSE45157	default	SINGLE	mm10 p6
197	One-to-all	CHART	Xist	lincRNA	None	1481	259233 (0.2%)	differentiating ES (day 7)	differentiating embryonic stem cells (day 7)	capture oligos: C-11	Mus musculus	Xist	Xist	None	inactive X specific transcripts	formaldehyde	2013	High-resolution Xist binding maps reveal two-step spreading during X-chromosome inactivation	10.1038/nature12719	GSM1182894; GSM1182893; GSM1182892	GSE48649	default	PAIRED	mm10 p6
196	One-to-all	ChIRP	Evx1os	antisense	None	0	0 (0.0%)	46C ES	embryonic stem cells	4 day of differentiation (cells were cultured without LIF for 4 days)	Mus musculus	Evx1os	Evx1as	None	Even skipped homeotic gene 1; opposite strand	UV light & dithiobis succinimidyl propionate & formaldehyde	2016	Divergent lncRNAs Regulate Gene Expression and Lineage Differentiation in Pluripotent Cells	10.1016/j.stem.2016.01.024	GSM2097551; GSM2097552	GSE70420	default	SINGLE	mm10 p6
195	One-to-all	RAP	Xist	lincRNA	None	35572	444872 (24.6%)	F1 2-1 ES	female embryonic stem cells	induction XIST time: 0 hours (retinoic acid)	Mus musculus	Xist	Xist	None	inactive X specific transcripts	formaldehyde	2013	The Xist lncRNA exploits three-dimensional genome architecture to spread across the X chromosome	10.1126/science.1237973	GSM1141192; GSM1141197	GSE46918	some GSMs; due to their low quality; were trimmed with other parameters: SLIDINGWINDOW:5:22 LEADING:22 MINLEN:14	PAIRED	mm10 p6
194	One-to-all	ChIRP	LINC01605	lncRNA	3913	0	0 (0.0%)	V703	colon carcinoma cells	None	Homo sapiens	LINC01605	lincDUSP	NR_144384.1	Long Intergenic Non-Protein Coding RNA 1605	formaldehyde	2018	Colon Cancer-Upregulated Long Non-Coding RNA lincDUSP Regulates Cell Cycle Genes and Potentiates Resistance to Apoptosis	10.1038/s41598-018-25530-5	GSM3073889; GSM3073888	GSE112602	default	SINGLE	hg38 p13
193	One-to-all	ChOP	MEG3	lncRNA	6837	111843	905584 (90.0%)	BT-549	female breast cancer cells	None	Homo sapiens	MEG3	MEG3	None	Maternally Expressed 3	glutaraldehyde	2015	MEG3 long noncoding RNA regulates the TGF-β pathway genes through formation of RNA–DNA triplex structures	10.1038/ncomms8743	ERR652841; ERR652840	ERR652	default	SINGLE	hg38 p13
192	One-to-all	CHART	Xist	lincRNA	None	33452	11137708 (51.7%)	MEF	mouse embryonic fibroblasts	RING1A/RING1B (the catalytic components of PRC1) double KO	Mus musculus	Xist	Xist	None	inactive X specific transcripts	formaldehyde	2019	Xist Deletional Analysis Reveals an Interdependency between Xist RNA and Polycomb Complexes for Spreading along the Inactive X	10.1016/j.molcel.2019.01.015	GSM3517952; GSM3517955; GSM3517953	GSE107217	default	PAIRED	mm10 p6
191	One-to-all	CHART	Xist	lincRNA	None	88679	4231423 (20.7%)	MEF	mouse embryonic fibroblasts	EED (a core component of PRC2) KO	Mus musculus	Xist	Xist	None	inactive X specific transcripts	formaldehyde	2019	Xist Deletional Analysis Reveals an Interdependency between Xist RNA and Polycomb Complexes for Spreading along the Inactive X	10.1016/j.molcel.2019.01.015	GSM3517948; GSM3517951; GSM3517949	GSE107217	default	PAIRED	mm10 p6
190	One-to-all	CHART	Xist	lincRNA	None	45733	5208393 (53.1%)	pSM33 ES	embryonic stem cells	wild-type Xist	Mus musculus	Xist	Xist	None	inactive X specific transcripts	formaldehyde	2016	Xist recruits the X chromosome to the nuclear lamina to enable chromosome-wide silencing	10.1126/science.aae0047	GSM2128923; GSM2128922	GSE80510	default	PAIRED	mm10 p6
189	One-to-all	CHART	Xist	lincRNA	None	13029	114560 (7.0%)	pSM33-dLBS ES	embryonic stem cells	LBR binding site deletion Xist	Mus musculus	Xist	Xist	None	inactive X specific transcripts	formaldehyde	2016	Xist recruits the X chromosome to the nuclear lamina to enable chromosome-wide silencing	10.1126/science.aae0047	GSM2128921	GSE80510	some GSMs; due to their low quality; were trimmed with other parameters: SLIDINGWINDOW:5:22 LEADING:22 MINLEN:14	PAIRED	mm10 p6
188	One-to-all	CHART	Xist	lincRNA	None	136977	2499879 (41.3%)	pSM33 ES	embryonic stem cells	SHARP CRISPRi knock down	Mus musculus	Xist	Xist	None	inactive X specific transcripts	formaldehyde	2016	Xist recruits the X chromosome to the nuclear lamina to enable chromosome-wide silencing	10.1126/science.aae0047	GSM2128919	GSE80510	default	PAIRED	mm10 p6
187	One-to-all	CHART	Xist	lincRNA	None	67723	2646024 (32.8%)	pSM33 ES	embryonic stem cells	dLBS-Xist rescued with LMNB1 (Xist-BoxB interacts with Lamin B1-λN and this complex already interacts with LBR)	Mus musculus	Xist	Xist	None	inactive X specific transcripts	formaldehyde	2016	Xist recruits the X chromosome to the nuclear lamina to enable chromosome-wide silencing	10.1126/science.aae0047	GSM2128918	GSE80510	some GSMs; due to their low quality; were trimmed with other parameters: SLIDINGWINDOW:5:22 LEADING:22 MINLEN:14	PAIRED	mm10 p6
186	One-to-all	ChIRP	7SK RNAs	multi-copy	None	42008	541141 (17.2%)	HEK293T	Unknown	BRD4 knockdown (by siRNAs)	Homo sapiens	None	7SK	7SK RNAs	None	glutaraldehyde	2013	Brd4 and JMJD6-associated anti-pause enhancers in regulation of transcriptional pause release	10.1016/j.cell.2013.10.056	GSM1249903; GSM1249904	GSE51633	some GSMs; due to their low quality; were trimmed with other parameters: SLIDINGWINDOW:5:22 LEADING:22 MINLEN:14	SINGLE	hg38 p13
185	One-to-all	ChIRP	7SK RNAs	multi-copy	None	9708	52396 (3.0%)	HEK293T	Unknown	JMJD6 knockdown (by siRNAs)	Homo sapiens	None	7SK	7SK RNAs	None	glutaraldehyde	2013	Brd4 and JMJD6-associated anti-pause enhancers in regulation of transcriptional pause release	10.1016/j.cell.2013.10.056	GSM1249901; GSM1249902	GSE51633	some GSMs; due to their low quality; were trimmed with other parameters: SLIDINGWINDOW:5:22 LEADING:22 MINLEN:14	SINGLE	hg38 p13
184	One-to-all	ChIRP	PCGEM1	lncRNA	2142	3194	43738 (0.3%)	LNCaP	prostate cancer	treated with: 100 nM DHT (dihydrotestosterone induces association of AR with both PRNCR1 and PCGEM1)	Homo sapiens	PCGEM1	PCGEM1	None	PCGEM1 Prostate-Specific Transcript	glutaraldehyde	2013	lncRNA-dependent mechanisms of androgen-receptor-regulated gene activation programs	10.1038/nature12451	GSM1159894	GSE47807	default	SINGLE	hg38 p13
183	One-to-all	ChIRP	Malat1	lincRNA	None	38	2101 (0.0%)	ES	embryonic stem cells	treatment: triptolide (transcription inhibitor) for 1 hour	Mus musculus	Malat1	Malat1	Neat2	Metastasis Associated Lung Adenocarcinoma Transcript 1	dithiobis succinimidyl propionate & formaldehyde	2020	U1 snRNP regulates chromatin retention of noncoding RNAs	10.1038/s41586-020-2105-3	GSM3941430	GSE134287	default	PAIRED	mm10 p6
182	One-to-all	ChIRP	Malat1	lincRNA	None	64	16053 (0.3%)	ES	embryonic stem cells	treatment: DMSO (control with respect to triptolide treatment) for 1 hour	Mus musculus	Malat1	Malat1	Neat2	Metastasis Associated Lung Adenocarcinoma Transcript 1	dithiobis succinimidyl propionate & formaldehyde	2020	U1 snRNP regulates chromatin retention of noncoding RNAs	10.1038/s41586-020-2105-3	GSM3941429	GSE134287	default	PAIRED	mm10 p6
181	One-to-all	ChIRP	Malat1	lincRNA	None	174	9820 (0.3%)	SNRNP70-AID ES	embryonic stem cells	clones with homozygous deletion of endogenous SNRNP70 and rapid removal of exogenous AID-tagged SNRNP70; the auxin analogue indole-3-acetic acid (IAA) was used for 4 hour to induce the degradation of AID-tagged SNRNP70 protein (U1 snRNP protein component)	Mus musculus	Malat1	Malat1	Neat2	Metastasis Associated Lung Adenocarcinoma Transcript 1	dithiobis succinimidyl propionate & formaldehyde	2020	U1 snRNP regulates chromatin retention of noncoding RNAs	10.1038/s41586-020-2105-3	GSM3941425	GSE134287	default	PAIRED	mm10 p6
180	One-to-all	ChIRP	HOXBLINC	lincRNA	None	27532	1421333 (18.1%)	Lin- Kit+ (LK) cells	bone marrow	genotype: Hoxblinc-Tg (overexpression of HoxBlinc); Lin- and Kit+ are markers	Mus musculus	None	HOXBLINC	None	HOXB locus-associated long non-coding RNA	glutaraldehyde	2021	HOXBLINC long non-coding RNA activation promotes leukemogenesis in NPM1-mutant acute myeloid leukemia	10.1038/s41467-021-22095-2	GSM4710566	GSE115096	default	PAIRED	mm10 p6
179	One-to-all	ChIRP	HOXBLINC	lincRNA	None	9897	649164 (4.3%)	Lin- Kit+ (LK) cells	bone marrow	genotype: WT; Lin- and Kit+ are markers	Mus musculus	None	HOXBLINC	None	HOXB locus-associated long non-coding RNA	glutaraldehyde	2021	HOXBLINC long non-coding RNA activation promotes leukemogenesis in NPM1-mutant acute myeloid leukemia	10.1038/s41467-021-22095-2	GSM4710565	GSE115096	default	PAIRED	mm10 p6
178	One-to-all	ChIRP	HOXBLINC	lincRNA	None	14647	570378 (7.6%)	Lin- Sca1+ Kit+ (LSK) cells	bone marrow	genotype: Hoxblinc-Tg (overexpression of HoxBlinc); Lin- and Sca1+ and Kit+ are markers	Mus musculus	None	HOXBLINC	None	HOXB locus-associated long non-coding RNA	glutaraldehyde	2021	HOXBLINC long non-coding RNA activation promotes leukemogenesis in NPM1-mutant acute myeloid leukemia	10.1038/s41467-021-22095-2	GSM3728756	GSE115096	default	PAIRED	mm10 p6
177	One-to-all	CHART	Xist	lincRNA	None	54092	2483935 (7.1%)	NPC	ESC-derived clonal neural progenitor cells	genotype: Smchd1-/-	Mus musculus	Xist	Xist	None	inactive X specific transcripts	formaldehyde	2018	SMCHD1 merges chromosome compartments and assists formation of super-structures on the inactive X	10.1016/j.cell.2018.05.007	GSM2667253; GSM2667254; GSM2667259; GSM2667260	GSE99991	default	PAIRED	mm10 p6
176	One-to-all	CHART	Xist	lincRNA	None	614	29167 (0.1%)	NPC	ESC-derived clonal neural progenitor cells	None	Mus musculus	Xist	Xist	None	inactive X specific transcripts	formaldehyde	2018	SMCHD1 merges chromosome compartments and assists formation of super-structures on the inactive X	10.1016/j.cell.2018.05.007	GSM2667256; GSM2667250; GSM2667251; GSM2667257	GSE99991	default	PAIRED	mm10 p6
175	One-to-all	CHART	MALAT1	lncRNA	51	307	34413 (0.1%)	MCF-7	mammary adenocarcinoma cells	treatment: flavopiridol (a transcription elongation inhibitor) for 1 hour; capture oligo: MALAT1 CO2	Homo sapiens	MALAT1	MALAT1	NEAT2	Metastasis Associated Lung Adenocarcinoma Transcript 1	formaldehyde	2014	The Long Noncoding RNAs NEAT1 and MALAT1 Bind Active Chromatin Sites	10.1016/j.molcel.2014.07.012	GSM1411272; GSM1411270; GSM1411265; GSM1411263	GSE58444	default	PAIRED	hg38 p13
174	One-to-all	CHART	MALAT1	lncRNA	96	550	65886 (0.1%)	MCF-7	mammary adenocarcinoma cells	treatment: flavopiridol (a transcription elongation inhibitor) for 1 hour; capture oligo: MALAT1 CO1	Homo sapiens	MALAT1	MALAT1	NEAT2	Metastasis Associated Lung Adenocarcinoma Transcript 1	formaldehyde	2014	The Long Noncoding RNAs NEAT1 and MALAT1 Bind Active Chromatin Sites	10.1016/j.molcel.2014.07.012	GSM1411269; GSM1411262; GSM1411265; GSM1411272	GSE58444	default	PAIRED	hg38 p13
173	One-to-all	CHART	NEAT1	lncRNA	45	944	102813 (0.2%)	MCF-7	mammary adenocarcinoma cells	treatment: flavopiridol (a transcription elongation inhibitor) for 1 hour; capture oligo: NEAT1 CO2	Homo sapiens	NEAT1	NEAT1	None	Nuclear Paraspeckle Assembly Transcript 1	formaldehyde	2014	The Long Noncoding RNAs NEAT1 and MALAT1 Bind Active Chromatin Sites	10.1016/j.molcel.2014.07.012	GSM1411267; GSM1411260; GSM1411265; GSM1411272	GSE58444	default	PAIRED	hg38 p13
172	One-to-all	CHART	NEAT1	lncRNA	219	1134	108486 (0.2%)	MCF-7	mammary adenocarcinoma cells	treatment: flavopiridol (a transcription elongation inhibitor) for 1 hour; capture oligo: NEAT1 CO1	Homo sapiens	NEAT1	NEAT1	None	Nuclear Paraspeckle Assembly Transcript 1	formaldehyde	2014	The Long Noncoding RNAs NEAT1 and MALAT1 Bind Active Chromatin Sites	10.1016/j.molcel.2014.07.012	GSM1411259; GSM1411266; GSM1411265; GSM1411272	GSE58444	default	PAIRED	hg38 p13
171	One-to-all	CHART	MALAT1	lncRNA	111	202	25186 (0.1%)	MCF-7	mammary adenocarcinoma cells	treatment: DMSO (control with respect to flavopiridol treatment) for 1 hour; capture oligo: MALAT1 CO2	Homo sapiens	MALAT1	MALAT1	NEAT2	Metastasis Associated Lung Adenocarcinoma Transcript 1	formaldehyde	2014	The Long Noncoding RNAs NEAT1 and MALAT1 Bind Active Chromatin Sites	10.1016/j.molcel.2014.07.012	GSM1411249; GSM1411251; GSM1411256; GSM1411258	GSE58444	default	PAIRED	hg38 p13
170	One-to-all	CHART	MALAT1	lncRNA	115	187	18360 (0.1%)	MCF-7	mammary adenocarcinoma cells	treatment: DMSO (control with respect to flavopiridol treatment) for 1 hour; capture oligo: MALAT1 CO1	Homo sapiens	MALAT1	MALAT1	NEAT2	Metastasis Associated Lung Adenocarcinoma Transcript 1	formaldehyde	2014	The Long Noncoding RNAs NEAT1 and MALAT1 Bind Active Chromatin Sites	10.1016/j.molcel.2014.07.012	GSM1411255; GSM1411251; GSM1411258; GSM1411248	GSE58444	default	PAIRED	hg38 p13
169	One-to-all	CHART	NEAT1	lncRNA	44	413	43937 (0.1%)	MCF-7	mammary adenocarcinoma cells	treatment: DMSO (control with respect to flavopiridol treatment) for 1 hour; capture oligo: NEAT1 CO2	Homo sapiens	NEAT1	NEAT1	None	Nuclear Paraspeckle Assembly Transcript 1	formaldehyde	2014	The Long Noncoding RNAs NEAT1 and MALAT1 Bind Active Chromatin Sites	10.1016/j.molcel.2014.07.012	GSM1411246; GSM1411251; GSM1411253; GSM1411258	GSE58444	default	PAIRED	hg38 p13
168	One-to-all	CHART	NEAT1	lncRNA	166	453	44530 (0.1%)	MCF-7	mammary adenocarcinoma cells	treatment: DMSO (control with respect to flavopiridol treatment) for 1 hour; capture oligo: NEAT1 CO1	Homo sapiens	NEAT1	NEAT1	None	Nuclear Paraspeckle Assembly Transcript 1	formaldehyde	2014	The Long Noncoding RNAs NEAT1 and MALAT1 Bind Active Chromatin Sites	10.1016/j.molcel.2014.07.012	GSM1411251; GSM1411252; GSM1411258; GSM1411245	GSE58444	default	PAIRED	hg38 p13
167	One-to-all	CHART	MALAT1	lncRNA	68	182	21688 (0.1%)	ERα-positive MCF-7	mammary adenocarcinoma cells	treatment: 17β-estradiol for 40 minutes; capture oligo: MALAT1 CO2	Homo sapiens	MALAT1	MALAT1	NEAT2	Metastasis Associated Lung Adenocarcinoma Transcript 1	formaldehyde	2014	The Long Noncoding RNAs NEAT1 and MALAT1 Bind Active Chromatin Sites	10.1016/j.molcel.2014.07.012	GSM1411235; GSM1411244; GSM1411242; GSM1411237	GSE58444	default	PAIRED	hg38 p13
166	One-to-all	CHART	MALAT1	lncRNA	71	127	11355 (0.0%)	ERα-positive MCF-7	mammary adenocarcinoma cells	treatment: 17β-estradiol for 40 minutes; capture oligo: MALAT1 CO1	Homo sapiens	MALAT1	MALAT1	NEAT2	Metastasis Associated Lung Adenocarcinoma Transcript 1	formaldehyde	2014	The Long Noncoding RNAs NEAT1 and MALAT1 Bind Active Chromatin Sites	10.1016/j.molcel.2014.07.012	GSM1411244; GSM1411237; GSM1411241; GSM1411234	GSE58444	default	PAIRED	hg38 p13
165	One-to-all	CHART	NEAT1	lncRNA	36	473	53514 (0.1%)	ERα-positive MCF-7	mammary adenocarcinoma cells	treatment: 17β-estradiol for 40 minutes; capture oligo: NEAT1 CO2	Homo sapiens	NEAT1	NEAT1	None	Nuclear Paraspeckle Assembly Transcript 1	formaldehyde	2014	The Long Noncoding RNAs NEAT1 and MALAT1 Bind Active Chromatin Sites	10.1016/j.molcel.2014.07.012	GSM1411232; GSM1411237; GSM1411244; GSM1411239	GSE58444	default	PAIRED	hg38 p13
164	One-to-all	CHART	NEAT1	lncRNA	172	545	51855 (0.1%)	ERα-positive MCF-7	mammary adenocarcinoma cells	treatment: 17β-estradiol for 40 minutes; capture oligo: NEAT1 CO1	Homo sapiens	NEAT1	NEAT1	None	Nuclear Paraspeckle Assembly Transcript 1	formaldehyde	2014	The Long Noncoding RNAs NEAT1 and MALAT1 Bind Active Chromatin Sites	10.1016/j.molcel.2014.07.012	GSM1411238; GSM1411244; GSM1411231; GSM1411237	GSE58444	default	PAIRED	hg38 p13
163	One-to-all	CHART	MALAT1	lncRNA	29	73	10148 (0.0%)	ERα-positive MCF-7	mammary adenocarcinoma cells	treatment: ethanol (control with respect to 17β-estradiol treatment) for 40 minutes; capture oligo: MALAT1 CO2	Homo sapiens	MALAT1	MALAT1	NEAT2	Metastasis Associated Lung Adenocarcinoma Transcript 1	formaldehyde	2014	The Long Noncoding RNAs NEAT1 and MALAT1 Bind Active Chromatin Sites	10.1016/j.molcel.2014.07.012	GSM1411223; GSM1411221; GSM1411230; GSM1411228	GSE58444	default	PAIRED	hg38 p13
162	One-to-all	CHART	MALAT1	lncRNA	38	17	1010 (0.0%)	ERα-positive MCF-7	mammary adenocarcinoma cells	treatment: ethanol (control with respect to 17β-estradiol treatment) for 40 minutes; capture oligo: MALAT1 CO1	Homo sapiens	MALAT1	MALAT1	NEAT2	Metastasis Associated Lung Adenocarcinoma Transcript 1	formaldehyde	2014	The Long Noncoding RNAs NEAT1 and MALAT1 Bind Active Chromatin Sites	10.1016/j.molcel.2014.07.012	GSM1411223; GSM1411220; GSM1411227; GSM1411230	GSE58444	default	PAIRED	hg38 p13
161	One-to-all	CHART	NEAT1	lncRNA	16	53	9567 (0.0%)	ERα-positive MCF-7	mammary adenocarcinoma cells	treatment: ethanol (control with respect to 17β-estradiol treatment) for 40 minutes; capture oligo: NEAT1 CO2	Homo sapiens	NEAT1	NEAT1	None	Nuclear Paraspeckle Assembly Transcript 1	formaldehyde	2014	The Long Noncoding RNAs NEAT1 and MALAT1 Bind Active Chromatin Sites	10.1016/j.molcel.2014.07.012	GSM1411223; GSM1411218; GSM1411225; GSM1411230	GSE58444	default	PAIRED	hg38 p13
160	One-to-all	CHART	NEAT1	lncRNA	85	230	23168 (0.1%)	ERα-positive MCF-7	mammary adenocarcinoma cells	treatment: ethanol (control with respect to 17β-estradiol treatment) for 40 minutes; capture oligo: NEAT1 CO1	Homo sapiens	NEAT1	NEAT1	None	Nuclear Paraspeckle Assembly Transcript 1	formaldehyde	2014	The Long Noncoding RNAs NEAT1 and MALAT1 Bind Active Chromatin Sites	10.1016/j.molcel.2014.07.012	GSM1411223; GSM1411217; GSM1411224; GSM1411230	GSE58444	default	PAIRED	hg38 p13
159	One-to-all	ChIRP	7SK RNAs	multi-copy	None	116633	313122 (25.8%)	HEK293T	Unknown	control siRNA	Homo sapiens	None	7SK	7SK RNAs	None	glutaraldehyde	2013	Brd4 and JMJD6-associated anti-pause enhancers in regulation of transcriptional pause release	10.1016/j.cell.2013.10.056	GSM1249900	GSE51633	some GSMs; due to their low quality; were trimmed with other parameters: SLIDINGWINDOW:5:22 LEADING:22 MINLEN:14	SINGLE	hg38 p13
158	One-to-all	CHART	Xist	lincRNA	None	30965	862376 (2.8%)	differentiating ES (day 10)	differentiating embryonic stem cells (day 10)	capture oligos: C-11	Mus musculus	Xist	Xist	None	inactive X specific transcripts	formaldehyde	2013	High-resolution Xist binding maps reveal two-step spreading during X-chromosome inactivation	10.1038/nature12719	GSM1182894; GSM1216702; GSM1216701	GSE48649	default	PAIRED	mm10 p6
157	One-to-all	CHART	Xist	lincRNA	None	69717	2333041 (5.3%)	differentiating ES (day 3)	differentiating embryonic stem cells (day 3)	capture oligos: C-11	Mus musculus	Xist	Xist	None	inactive X specific transcripts	formaldehyde	2013	High-resolution Xist binding maps reveal two-step spreading during X-chromosome inactivation	10.1038/nature12719	GSM1182894; GSM1182890; GSM1182891	GSE48649	default	PAIRED	mm10 p6
156	One-to-all	CHART	Xist	lincRNA	None	19601	768925 (1.6%)	undifferentiated ES	undifferentiated embryonic stem cells	capture oligos: C-11	Mus musculus	Xist	Xist	None	inactive X specific transcripts	formaldehyde	2013	High-resolution Xist binding maps reveal two-step spreading during X-chromosome inactivation	10.1038/nature12719	GSM1182889; GSM1182894; GSM1182888	GSE48649	some GSMs; due to their low quality; were trimmed with other parameters: SLIDINGWINDOW:5:22 LEADING:22 MINLEN:14	PAIRED	mm10 p6
155	One-to-all	CHART	Xist	lincRNA	None	73206	2693538 (5.8%)	Immortalized MEFs	immortalized mouse embryonic fibroblasts	8 hr post tranfection of LNA-4978 (locked nucleic acids); capture oligos: C-11	Mus musculus	Xist	Xist	None	inactive X specific transcripts	formaldehyde	2013	High-resolution Xist binding maps reveal two-step spreading during X-chromosome inactivation	10.1038/nature12719	GSM1182886; GSM1182887; GSM1182877	GSE48649	default	PAIRED	mm10 p6
154	One-to-all	CHART	Xist	lincRNA	None	45224	1748694 (3.6%)	Immortalized MEFs	immortalized mouse embryonic fibroblasts	3 hr post tranfection of LNA-4978 (locked nucleic acids); capture oligos: C-11	Mus musculus	Xist	Xist	None	inactive X specific transcripts	formaldehyde	2013	High-resolution Xist binding maps reveal two-step spreading during X-chromosome inactivation	10.1038/nature12719	GSM1182885; GSM1182884; GSM1182877	GSE48649	default	PAIRED	mm10 p6
153	One-to-all	CHART	Xist	lincRNA	None	8948	334350 (0.8%)	Immortalized MEFs	immortalized mouse embryonic fibroblasts	3 hr post tranfection of LNA-C1 (locked nucleic acids); capture oligos: C-11	Mus musculus	Xist	Xist	None	inactive X specific transcripts	formaldehyde	2013	High-resolution Xist binding maps reveal two-step spreading during X-chromosome inactivation	10.1038/nature12719	GSM1182880; GSM1182877; GSM1182879	GSE48649	default	PAIRED	mm10 p6
152	One-to-all	ChIRP	PCGEM1	lncRNA	323	11260	66429 (0.9%)	LNCaP	prostate cancer	None	Homo sapiens	PCGEM1	PCGEM1	None	PCGEM1 Prostate-Specific Transcript	glutaraldehyde	2013	lncRNA-dependent mechanisms of androgen-receptor-regulated gene activation programs	10.1038/nature12451	GSM1159893	GSE47807	default	SINGLE	hg38 p13
151	One-to-all	RAP	Xist	lincRNA	None	38076	3821820 (45.6%)	pSM33 ES	male embryonic stem cells	Xist is expressed from the endogenous locus under control of a tet-inducible promoter (induction time: 6 hours)	Mus musculus	Xist	Xist	None	inactive X specific transcripts	formaldehyde	2013	The Xist lncRNA exploits three-dimensional genome architecture to spread across the X chromosome	10.1126/science.1237973	GSM1141178; GSM1141169; GSM1141174	GSE46918	default	PAIRED	mm10 p6
150	One-to-all	RAP	Xist	lincRNA	None	33076	4398320 (54.2%)	pSM33 ES	male embryonic stem cells	Xist is expressed from the endogenous locus under control of a tet-inducible promoter (induction time: 3 hours)	Mus musculus	Xist	Xist	None	inactive X specific transcripts	formaldehyde	2013	The Xist lncRNA exploits three-dimensional genome architecture to spread across the X chromosome	10.1126/science.1237973	GSM1141177; GSM1141168; GSM1141173	GSE46918	default	PAIRED	mm10 p6
149	One-to-all	RAP	Xist	lincRNA	None	48578	2475132 (40.2%)	pSM33 ES	male embryonic stem cells	Xist is expressed from the endogenous locus under control of a tet-inducible promoter (induction time: 2 hours)	Mus musculus	Xist	Xist	None	inactive X specific transcripts	formaldehyde	2013	The Xist lncRNA exploits three-dimensional genome architecture to spread across the X chromosome	10.1126/science.1237973	GSM1141167; GSM1141172; GSM1141176	GSE46918	default	PAIRED	mm10 p6
148	One-to-all	RAP	Xist	lincRNA	None	12584	207431 (7.9%)	pSM33 ES	male embryonic stem cells	Xist is expressed from the endogenous locus under control of a tet-inducible promoter (induction time: 1 hours)	Mus musculus	Xist	Xist	None	inactive X specific transcripts	formaldehyde	2013	The Xist lncRNA exploits three-dimensional genome architecture to spread across the X chromosome	10.1126/science.1237973	GSM1141175; GSM1141166; GSM1141171	GSE46918	some GSMs; due to their low quality; were trimmed with other parameters: SLIDINGWINDOW:5:22 LEADING:22 MINLEN:14	PAIRED	mm10 p6
147	One-to-all	RAP	Xist	lincRNA	None	1375	20619 (0.7%)	pSM33 ES	male embryonic stem cells	Xist is expressed from the endogenous locus under control of a tet-inducible promoter (induction time: 0 hours)	Mus musculus	Xist	Xist	None	inactive X specific transcripts	formaldehyde	2013	The Xist lncRNA exploits three-dimensional genome architecture to spread across the X chromosome	10.1126/science.1237973	GSM1141175; GSM1141165; GSM1141170	GSE46918	some GSMs; due to their low quality; were trimmed with other parameters: SLIDINGWINDOW:5:22 LEADING:22 MINLEN:14	PAIRED	mm10 p6
146	One-to-all	ChIRP	Malat1	lincRNA	None	79	9259 (0.2%)	SNRNP70-AID ES	embryonic stem cells	clones with homozygous deletion of endogenous SNRNP70 and rapid removal of exogenous AID-tagged SNRNP70; the auxin analogue indole-3-acetic acid (IAA) was used for 0 hour to induce the degradation of AID-tagged SNRNP70 protein (U1 snRNP protein component)	Mus musculus	Malat1	Malat1	Neat2	Metastasis Associated Lung Adenocarcinoma Transcript 1	dithiobis succinimidyl propionate & formaldehyde	2020	U1 snRNP regulates chromatin retention of noncoding RNAs	10.1038/s41586-020-2105-3	GSM3941421	GSE134287	default	PAIRED	mm10 p6
145	One-to-all	ChIRP	Linc-ASEN	lncRNA	None	64320	886566 (3.5%)	MCF-7	breast cancer	None	Homo sapiens	None	Linc-ASEN	None	Long intergenic noncoding RNA associated with senescence	glutaraldehyde	2020	A novel long noncoding RNA Linc-ASEN represses cellular senescence through multileveled reduction of p21 expression	10.1038/s41418-019-0467-6	GSM3673641	GSE128398	default	SINGLE	hg38 p13
144	One-to-all	CHART	Xist	lincRNA	None	42105	1813168 (5.7%)	MEF	mouse embryonic fibroblasts	genotype: Smchd1-/- (structural maintenance of chromosomes hinge domain containing 1)	Mus musculus	Xist	Xist	None	inactive X specific transcripts	formaldehyde	2019	PRC1 collaborates with SMCHD1 to fold the X-chromosome and spread Xist RNA between chromosome compartments	10.1038/s41467-019-10755-3	GSM3722613; GSM3722617; GSM3722612; GSM3722616	GSE116413	default	PAIRED	mm10 p6
143	One-to-all	CHART	Xist	lincRNA	None	59610	3398643 (10.8%)	MEF	mouse embryonic fibroblasts	None	Mus musculus	Xist	Xist	None	inactive X specific transcripts	formaldehyde	2019	PRC1 collaborates with SMCHD1 to fold the X-chromosome and spread Xist RNA between chromosome compartments	10.1038/s41467-019-10755-3	GSM3722615; GSM3722611; GSM3722614; GSM3722610	GSE116413	default	PAIRED	mm10 p6
142	One-to-all	ChIRP	HOXBLINC	lincRNA	None	20735	1063019 (10.4%)	Lin- Sca1+ Kit+ (LSK) cells	bone marrow	genotype: WT; Lin- and Sca1+ and Kit+ are markers	Mus musculus	None	HOXBLINC	None	HOXB locus-associated long non-coding RNA	glutaraldehyde	2021	HOXBLINC long non-coding RNA activation promotes leukemogenesis in NPM1-mutant acute myeloid leukemia	10.1038/s41467-021-22095-2	GSM3728755	GSE115096	default	PAIRED	mm10 p6
141	One-to-all	ChIRP	lnc-NR2F1_short	lncRNA	415	25142	2715007 (4.5%)	hNPC	human neural progenitor cell differentiated 12d from embryonic stem cells	None	Homo sapiens	None	lnc-NR2F1_short	NR_021490.2	NR2F1 Antisense RNA 1	glutaraldehyde	2019	The novel lncRNA lnc-NR2F1 is pro-neurogenic and mutated in human neurodevelopmental disorders	10.7554/eLife.41770	GSM3567442; GSM3567445; GSM3567441; GSM3567433; GSM3567432; GSM3567436	GSE115079	default	SINGLE & PAIRED	hg38 p13
140	One-to-all	ChIRP	NR2F1-AS1	lncRNA	4404	255520	15257597 (47.9%)	hNPC	human neural progenitor cell differentiated 12d from embryonic stem cells	None	Homo sapiens	NR2F1-AS1	lnc-NR2F1_long	NR_109825.1; NR_021491.2	NR2F1 Antisense RNA 1	glutaraldehyde	2019	The novel lncRNA lnc-NR2F1 is pro-neurogenic and mutated in human neurodevelopmental disorders	10.7554/eLife.41770	GSM3567428; GSM3567437; GSM3567445; GSM3567438; GSM3567429; GSM3567436	GSE115079	default	SINGLE & PAIRED	hg38 p13
139	One-to-all	ChIRP	HOTTIP	lncRNA	3767	27489	175139 (3.7%)	MOLM13	human-derived acute myeloid leukemia cells	None	Homo sapiens	HOTTIP	HOTTIP	None	HOXA Distal Transcript Antisense RNA	formaldehyde	2019	HOTTIP lncRNA Promotes Hematopoietic Stem Cell Self-Renewal Leading to AML-like Disease in Mice	10.1016/j.ccell.2019.10.011	GSM3161929	GSE114981	default	PAIRED	hg38 p13
138	One-to-all	CHART	Xist	lincRNA	None	61413	8177317 (18.2%)	MEF	mouse embryonic fibroblasts	Loss of Repeat B	Mus musculus	Xist	Xist	None	inactive X specific transcripts	formaldehyde	2019	Xist Deletional Analysis Reveals an Interdependency between Xist RNA and Polycomb Complexes for Spreading along the Inactive X	10.1016/j.molcel.2019.01.015	GSM2862882; GSM2862876; GSM2862883; GSM2862877	GSE107217	default	PAIRED	mm10 p6
137	One-to-all	CHART	Xist	lincRNA	None	30327	14127297 (30.0%)	MEF	mouse embryonic fibroblasts	None	Mus musculus	Xist	Xist	None	inactive X specific transcripts	formaldehyde	2019	Xist Deletional Analysis Reveals an Interdependency between Xist RNA and Polycomb Complexes for Spreading along the Inactive X	10.1016/j.molcel.2019.01.015	GSM2862880; GSM2862873; GSM2862879; GSM2862874	GSE107217	default	PAIRED	mm10 p6
136	One-to-all	ChIRP	Meg3	lincRNA	None	188430	2939271 (50.0%)	MIN6-4N	Mouse Insulinoma cells	MIN6-4N cells were transfected with pcDNA3.1-Meg3; mouse m-Meg3-3 lacks exon-2b and exon-4	Mus musculus	Meg3	Meg3	None	Maternally Expressed 3	glutaraldehyde	2017	Long Noncoding RNA MEG3 Is an Epigenetic Determinant of Oncogenic Signaling in Functional Pancreatic Neuroendocrine Tumor Cells	10.1128/MCB.00278-17	GSM2652604; GSM2652605; GSM2652603	GSE99798	default	SINGLE	mm10 p6
135	One-to-all	ChIRP	Bloodlinc	lincRNA	269	160495	15659765 (22.0%)	MEL	mouse erythroleukemia cells	5 days of 2% DMSO-induced differentiation	Mus musculus	Bloodlinc	Bloodlinc	alncRNA-EC7	Bloodlinc; erythroid developmental long intergenic non-protein coding transcript	glutaraldehyde	2017	The Super-Enhancer-Derived alncRNA-EC7/Bloodlinc Potentiates Red Blood Cell Development in trans	10.1016/j.celrep.2017.05.082	GSM2677563; GSM2551940; GSM2551941; GSM2677564	GSE97121	default	SINGLE	mm10 p6
134	One-to-all	ChIRP	5430431A17Rik	lincRNA	99	131493	1420126 (63.9%)	myotubes	myotubes	2 days in vitro differentiated	Mus musculus	5430431A17Rik	Charme	None	RIKEN cDNA 5430431A17 gene; Chromatin architect of muscle expression	glutaraldehyde	2018	Deficiency in the nuclear long noncoding RNA Charme causes myogenic defects and heart remodeling in mice	10.15252/embj.201899697	GSM2477125; GSM2477123; GSM2477128	GSE94498	default	SINGLE	mm10 p6
133	One-to-all	ChIRP	ERV-9 RNAs	multi-copy	None	239562	2589754 (36.9%)	CD34+ cells	day 13 erythroblast	None	Homo sapiens	None	ERV-9	ERV-9 RNAs	None	glutaraldehyde	2017	Long non-coding RNAs transcribed by ERV-9 LTR retrotransposon act in cis to modulate long-range LTR enhancer function	10.1093/nar/gkx055	GSM2449979; GSM2449980; GSM2449981	GSE93282	default	PAIRED	hg38 p13
132	One-to-all	ChIRP	Eprn	lincRNA	None	22730	1927359 (4.0%)	V6.5 ES	embryonic stem cells	None	Mus musculus	Eprn	Ephemeron	D630045M09Rik; NR_045293.1	Ephemeron; early developmental lncRNA	glutaraldehyde	2017	A lncRNA fine tunes the dynamics of a cell state transition involving Lin28; let-7 and de novo DNA methylation	10.7554/eLife.23468	GSM2407084; GSM2407079; GSM2407080	GSE90574	default	SINGLE	mm10 p6
131	One-to-all	ChIRP	7SK RNAs	multi-copy	None	16989	604454 (4.6%)	V6.5 ES	embryonic stem cells	None	Mus musculus	None	7SK	7SK RNAs	None	glutaraldehyde	2017	A lncRNA fine tunes the dynamics of a cell state transition involving Lin28; let-7 and de novo DNA methylation	10.7554/eLife.23468	GSM2407084; GSM2407081	GSE90574	default	SINGLE	mm10 p6
130	One-to-all	ChIRP	SNHG1	lncRNA	None	339810	39186005 (55.0%)	HCT116	colorectal carcinoma	None	Homo sapiens	SNHG1	SNHG1	None	Small Nucleolar RNA Host Gene 1	formaldehyde	2017	The long noncoding RNA SNHG1 promotes tumor growth through regulating transcription of both local and distal genes	10.1038/onc.2017.286	GSM2285445; GSM2285443; GSM2285446; GSM2285453; GSM2285442; GSM2285452; GSM2285447; GSM2285451; GSM2285444	GSE85842	default	PAIRED	hg38 p13
129	One-to-all	CHART	B2 RNAs	multi-copy	9406	1411	46143 (0.2%)	NIH/3T3	fibroblasts	Pre-H/S (Heat Shock); chart probe: B2 RNA probe 2	Mus musculus	None	B2	B2 RNAs	SINE retrotransposons	formaldehyde	2016	Destabilization of B2 RNA by EZH2 activates the stress response	10.1016/j.cell.2016.11.041	GSM2187199; GSM2187198; GSM2419789	GSE82255	default	PAIRED	mm10 p6
128	One-to-all	CHART	B2 RNAs	multi-copy	18964	653	85240 (0.2%)	NIH/3T3	fibroblasts	Pre-H/S (Heat Shock); chart probe: B2 RNA probe 1	Mus musculus	None	B2	B2 RNAs	SINE retrotransposons	formaldehyde	2016	Destabilization of B2 RNA by EZH2 activates the stress response	10.1016/j.cell.2016.11.041	GSM2187199; GSM2187192; GSM2187198; GSM2187193	GSE82255	default	PAIRED	mm10 p6
127	One-to-all	CHART	B2 RNAs	multi-copy	9394	177901	1291204 (18.6%)	NIH/3T3	fibroblasts	Post-H/S (Heat Shock (45C) 15 minutes); chart probe: B2 RNA probe 2	Mus musculus	None	B2	B2 RNAs	SINE retrotransposons	formaldehyde	2016	Destabilization of B2 RNA by EZH2 activates the stress response	10.1016/j.cell.2016.11.041	GSM2187201; GSM2187200; GSM2419790	GSE82255	default	PAIRED	mm10 p6
126	One-to-all	CHART	B2 RNAs	multi-copy	31368	970	170207 (0.3%)	NIH/3T3	fibroblasts	Post-H/S (Heat Shock (45C) 15 minutes); chart probe: B2 RNA probe 1	Mus musculus	None	B2	B2 RNAs	SINE retrotransposons	formaldehyde	2016	Destabilization of B2 RNA by EZH2 activates the stress response	10.1016/j.cell.2016.11.041	GSM2187195; GSM2187201; GSM2187200; GSM2187194	GSE82255	default	PAIRED	mm10 p6
125	One-to-all	CHART	Xist	lincRNA	None	3678	60907 (2.1%)	pSM33 ES	embryonic stem cells	LBR CRISPRi knock down	Mus musculus	Xist	Xist	None	inactive X specific transcripts	formaldehyde	2016	Xist recruits the X chromosome to the nuclear lamina to enable chromosome-wide silencing	10.1126/science.aae0047	GSM2128917	GSE80510	default	PAIRED	mm10 p6
124	One-to-all	CHIRT	TERRA RNAs	multi-copy	∼4000	26953	1076833 (6.6%)	ES d0	embryonic stem cells	0 day of differentiation	Mus musculus	None	TERRA	TERRA RNAs	telomeric repeat-containing RNAs	glutaraldehyde	2017	TERRA RNA antagonizes ATRX and protects telomeres	10.1016/j.cell.2017.06.017	GSM1711915; GSM1711918	GSE79180	default	PAIRED	mm10 p6
123	One-to-all	ChIRP	Tug1	protein coding	approximately 3000	388715	2731592 (66.1%)	kidney podocyte	Podocyte	immortilization: SV40-Temperature Sensitive T-Antigen Immortalized; passage: 10-12	Mus musculus	Tug1	Tug1	None	taurine-upregulated gene 1	glutaraldehyde	2016	Long noncoding RNA Tug1 regulates mitochondrial bioenergetics in diabetic nephropathy	10.1172/JCI87927	GSM2053301; GSM2053305; GSM2053306; GSM2053303; GSM2053304; GSM2053302	GSE77493	default	SINGLE	mm10 p6
122	One-to-all	ChIRP	DINOL	lncRNA	None	147513	5303748 (62.6%)	U2OS	osteosarcoma cells	None	Homo sapiens	DINOL	DINO	None	Damage Induced Long Noncoding RNA	formaldehyde & ethylene glycol bis(succinimidyl succinate)	2016	An inducible long noncoding RNA amplifies DNA damage signaling	10.1038/ng.3673	GSM2011201; GSM2011202; GSM2011205	GSE76420	default	SINGLE	hg38 p13
121	One-to-all	ChIRP	Panct1	lincRNA	None	128251	8165855 (11.1%)	R1/E ES	embryonic stem cells	None	Mus musculus	None	Panct1	AK156552; AK156552_2900057E15Rik; 2900057E15Rik	pluripotency-associated noncoding transcript 1	glutaraldehyde	2017	lncRNA Panct1 Maintains Mouse Embryonic Stem Cell Identity by Regulating TOBF1 Recruitment to Oct-Sox Sequences in Early G1	10.1016/j.celrep.2017.11.045	GSM1903800; GSM1903801; GSM1903799	GSE73806	default	SINGLE	mm10 p6
120	One-to-all	ChIRP	9530018H14Rik	TEC	775	98762	546265 (43.1%)	Limb Bud	Limb Mesenchyme (developmental stage: E 11.0)	None	Mus musculus	9530018H14Rik	LncRNA-HIT	Hotchon	RIKEN cDNA 9530018H14 gene	glutaraldehyde	2015	LncRNA-HIT Functions as an Epigenetic Regulator of Chondrogenesis through Its Recruitment of p100/CBP Complexes	10.1371/journal.pgen.1005680	GSM1824717; GSM1824715; GSM1824716	GSE70986	default	SINGLE	mm10 p6
119	One-to-all	CHIRT	TERRA RNAs	multi-copy	500	2185	117986 (2.3%)	Immortalized MEFs	immortalized mouse embryonic fibroblasts	None	Mus musculus	None	TERRA	TERRA RNAs	telomeric repeat-containing RNAs	glutaraldehyde	2017	PAR-TERRA directs homologous sex chromosome pairing	10.1038/nsmb.3432	GSM1711920; GSM1711923	GSE69887	default	PAIRED	mm10 p6
118	One-to-all	CHIRT	PAR-TERRA RNAs	multi-copy	440	895	80982 (0.5%)	Immortalized MEFs	immortalized mouse embryonic fibroblasts	None	Mus musculus	None	PAR-TERRA	PAR-TERRA RNAs	PAR (pseudoautosomal region of both sex chromosomes) transcribes a class of telomeric RNA; dubbed “PAR-TERRA”; which accounts for a vast majority of all TERRA transcripts.	glutaraldehyde	2017	PAR-TERRA directs homologous sex chromosome pairing	10.1038/nsmb.3432	GSM1711919; GSM1711923	GSE69887	default	PAIRED	mm10 p6
117	One-to-all	CHIRT	TERRA RNAs	multi-copy	1884	18905	655618 (4.0%)	ES d7	embryonic stem cells	7 day of differentiation (cells were cultured without LIF for 4 days under non-adherent conditions and plated for an additional 3 days)	Mus musculus	None	TERRA	TERRA RNAs	telomeric repeat-containing RNAs	glutaraldehyde	2017	PAR-TERRA directs homologous sex chromosome pairing	10.1038/nsmb.3432	GSM1711927; GSM1711929	GSE69887	default	PAIRED	mm10 p6
116	One-to-all	CHIRT	PAR-TERRA RNAs	multi-copy	3199	25272	1291364 (5.6%)	ES d7	embryonic stem cells	7 day of differentiation (cells were cultured without LIF for 4 days under non-adherent conditions and plated for an additional 3 days)	Mus musculus	None	PAR-TERRA	PAR-TERRA RNAs	PAR (pseudoautosomal region of both sex chromosomes) transcribes a class of telomeric RNA; dubbed “PAR-TERRA”; which accounts for a vast majority of all TERRA transcripts.	glutaraldehyde	2017	PAR-TERRA directs homologous sex chromosome pairing	10.1038/nsmb.3432	GSM1711927; GSM1711928	GSE69887	default	PAIRED	mm10 p6
115	One-to-all	CHIRT	TERRA RNAs	multi-copy	2125	17392	634145 (3.8%)	ES d3	embryonic stem cells	3 day of differentiation (cells were cultured without LIF for 3 days under non-adherent conditions)	Mus musculus	None	TERRA	TERRA RNAs	telomeric repeat-containing RNAs	glutaraldehyde	2017	PAR-TERRA directs homologous sex chromosome pairing	10.1038/nsmb.3432	GSM1711926; GSM1711924	GSE69887	default	PAIRED	mm10 p6
114	One-to-all	CHIRT	PAR-TERRA RNAs	multi-copy	5373	33942	1533206 (7.7%)	ES d3	embryonic stem cells	3 day of differentiation (cells were cultured without LIF for 3 days under non-adherent conditions)	Mus musculus	None	PAR-TERRA	PAR-TERRA RNAs	PAR (pseudoautosomal region of both sex chromosomes) transcribes a class of telomeric RNA; dubbed “PAR-TERRA”; which accounts for a vast majority of all TERRA transcripts.	glutaraldehyde	2017	PAR-TERRA directs homologous sex chromosome pairing	10.1038/nsmb.3432	GSM1711925; GSM1711924	GSE69887	default	PAIRED	mm10 p6
113	One-to-all	CHIRT	TERRA RNAs	multi-copy	4054	26953	1076833 (6.6%)	ES d0	embryonic stem cells	0 day of differentiation	Mus musculus	None	TERRA	TERRA RNAs	telomeric repeat-containing RNAs	glutaraldehyde	2017	PAR-TERRA directs homologous sex chromosome pairing	10.1038/nsmb.3432	GSM2429693; GSM2429690	GSE69887	default	PAIRED	mm10 p6
112	One-to-all	CHIRT	PAR-TERRA RNAs	multi-copy	2304	11286	490690 (2.2%)	ES d0	embryonic stem cells	0 day of differentiation	Mus musculus	None	PAR-TERRA	PAR-TERRA RNAs	PAR (pseudoautosomal region of both sex chromosomes) transcribes a class of telomeric RNA; dubbed “PAR-TERRA”; which accounts for a vast majority of all TERRA transcripts.	glutaraldehyde	2017	PAR-TERRA directs homologous sex chromosome pairing	10.1038/nsmb.3432	GSM2429693; GSM1711914	GSE69887	default	PAIRED	mm10 p6
111	One-to-all	ChIRP	7SK RNAs	multi-copy	None	566032	34828669 (59.4%)	v6.5 ES	embryonic stem cells	treatment: JQ1 (bromodomain inhibitor promotes 7SK dissociation from enhancer chromatin genome wide) for 1 hour	Mus musculus	None	7SK	7SK RNAs	None	glutaraldehyde	2016	7SK-BAF axis controls pervasive transcription at enhancers	10.1038/nsmb.3176	GSM1693797; GSM1865825; GSM1865824	GSE69143	default	SINGLE	mm10 p6
110	One-to-all	ChIRP	7SK RNAs	multi-copy	12006	520269	37462229 (54.2%)	v6.5 ES	embryonic stem cells	treatment: DMSO (control with respect to JQ1 treatment) for 1 hour	Mus musculus	None	7SK	7SK RNAs	None	glutaraldehyde	2016	7SK-BAF axis controls pervasive transcription at enhancers	10.1038/nsmb.3176	GSM1693795; GSM1693797; GSM1693796	GSE69143	default	SINGLE	mm10 p6
109	One-to-all	ChIRP	7SK RNAs	multi-copy	5412	228704	15660075 (24.1%)	HeLa	cervical cancer cells	None	Homo sapiens	None	7SK	7SK RNAs	None	glutaraldehyde	2016	7SK-BAF axis controls pervasive transcription at enhancers	10.1038/nsmb.3176	GSM1693803; GSM1693801; GSM1693802	GSE69143	default	SINGLE	hg38 p13
108	One-to-all	ChIRP	7SK RNAs	multi-copy	6452	373276	21289090 (41.4%)	H1 ES	embryonic stem cells	None	Homo sapiens	None	7SK	7SK RNAs	None	glutaraldehyde	2016	7SK-BAF axis controls pervasive transcription at enhancers	10.1038/nsmb.3176	GSM1693799; GSM1693800; GSM1693798	GSE69143	default	SINGLE	hg38 p13
107	One-to-all	ChIRP	LncHSC-2	lincRNA	264	40529	454701 (4.2%)	HPC5	bone marrow derived hematopoietic progenitor cells	complete probe set	Mus musculus	None	LncHSC-2	None	None	glutaraldehyde	2015	Long Non-coding RNAs Control Hematopoietic Stem Cell Function	10.1016/j.stem.2015.02.002	GSM1632677; GSM1632676; GSM1632684; GSM1632685; GSM1632675	GSE63277	default	PAIRED	mm10 p6
106	One-to-all	ChIRP	LncHSC-2	lincRNA	264	64146	842240 (5.3%)	HPC5	bone marrow derived hematopoietic progenitor cells	probe set: odd (1;3;5;7;9;11) & even (2;4;6;8;10;12)	Mus musculus	None	LncHSC-2	None	None	glutaraldehyde	2015	Long Non-coding RNAs Control Hematopoietic Stem Cell Function	10.1016/j.stem.2015.02.002	GSM1632678; GSM1632677; GSM1632680; GSM1632681; GSM1632679	GSE63277	default	PAIRED	mm10 p6
105	One-to-all	CHART	Dalir	lincRNA	1427	80046	6577754 (9.3%)	N2A	neuroblastoma	None	Mus musculus	Dalir	Dali	None	DNMT1 associated long intergenic non-coding RNA	formaldehyde	2014	The long non-coding RNA Dali is an epigenetic regulator of neural differentiation	10.7554/eLife.04530	GSM1269959; GSM1518778; GSM1518776; GSM1518777	GSE62035	default	PAIRED	mm10 p6
104	One-to-all	ChIRP	DACOR1	lncRNA	338	64612	807900 (15.2%)	V852 cells with DACOR1 lentivirus	Unknown	None	Homo sapiens	None	DACOR1	TCONS_00023265	DNMT1-associated Colon Cancer Repressed lncRNA 1	formaldehyde	2015	DNMT1-associated long non-coding RNAs regulate global gene expression and DNA methylation in colon cancer	10.1093/hmg/ddv343	GSM1854426; GSM1854427	GSE58989	default	PAIRED	hg38 p13
103	One-to-all	ChIRP	Halr1	lincRNA	None	2069	452260 (11.5%)	46C ES	embryonic stem cells	None	Mus musculus	Halr1	Haunt	linc1547; linc-Hoxa1; Gm15055	Hoxa adjacent long noncoding RNA 1	UV light & dithiobis succinimidyl propionate & formaldehyde	2015	Opposing Roles for the lncRNA Haunt and Its Genomic Locus in Regulating HOXA Gene Activation during Embryonic Stem Cell Differentiation	10.1016/j.stem.2015.03.007	GSM1412848; GSM1412849	GSE58514	default	PAIRED	mm10 p6
102	One-to-all	ChIRP	Halr1	lincRNA	None	2356	34575 (0.7%)	46C ES	embryonic stem cells	treatment: LIF (Leukemia Inhibitory Factor) withdrawal & 2uM RA (Retinoic Acid is a well-characterized morphogen that regulates the spatial and temporal activation of HOX genes in vivo and in vitro) - day 1	Mus musculus	Halr1	Haunt	linc1547; linc-Hoxa1; Gm15055	Hoxa adjacent long noncoding RNA 1	UV light & dithiobis succinimidyl propionate & formaldehyde	2015	Opposing Roles for the lncRNA Haunt and Its Genomic Locus in Regulating HOXA Gene Activation during Embryonic Stem Cell Differentiation	10.1016/j.stem.2015.03.007	GSM1604255; GSM1604256	GSE58514	default	SINGLE	mm10 p6
101	One-to-all	CHART	NEAT1	lncRNA	over 1251	24314	1228720 (3.6%)	MCF-7	mammary adenocarcinoma cells	capture oligo: NEAT1 CO2	Homo sapiens	NEAT1	NEAT1	None	Nuclear Paraspeckle Assembly Transcript 1	formaldehyde	2014	The Long Noncoding RNAs NEAT1 and MALAT1 Bind Active Chromatin Sites	10.1016/j.molcel.2014.07.012	GSM1411211; GSM1411208	GSE58444	default	PAIRED	hg38 p13
100	One-to-all	CHART	NEAT1	lncRNA	over 1251	12571	545746 (2.5%)	MCF-7	mammary adenocarcinoma cells	capture oligo: NEAT1 CO1	Homo sapiens	NEAT1	NEAT1	None	Nuclear Paraspeckle Assembly Transcript 1	formaldehyde	2014	The Long Noncoding RNAs NEAT1 and MALAT1 Bind Active Chromatin Sites	10.1016/j.molcel.2014.07.012	GSM1411211; GSM1411207	GSE58444	default	PAIRED	hg38 p13
99	One-to-all	CHART	MALAT1	lncRNA	over 670	11322	642739 (2.4%)	MCF-7	mammary adenocarcinoma cells	capture oligo: MALAT1 CO2	Homo sapiens	MALAT1	MALAT1	NEAT2	Metastasis Associated Lung Adenocarcinoma Transcript 1	formaldehyde	2014	The Long Noncoding RNAs NEAT1 and MALAT1 Bind Active Chromatin Sites	10.1016/j.molcel.2014.07.012	GSM1411212; GSM1411210	GSE58444	default	PAIRED	hg38 p13
98	One-to-all	CHART	MALAT1	lncRNA	over 670	11769	561105 (2.8%)	MCF-7	mammary adenocarcinoma cells	capture oligo: MALAT1 CO1	Homo sapiens	MALAT1	MALAT1	NEAT2	Metastasis Associated Lung Adenocarcinoma Transcript 1	formaldehyde	2014	The Long Noncoding RNAs NEAT1 and MALAT1 Bind Active Chromatin Sites	10.1016/j.molcel.2014.07.012	GSM1411209; GSM1411212	GSE58444	default	PAIRED	hg38 p13
97	One-to-all	RAP	Xist	lincRNA	None	45733	5208393 (53.1%)	pSM33 ES	embryonic stem cells	None	Mus musculus	Xist	Xist	None	inactive X specific transcripts	disuccinimidyl glutarate & formaldehyde	2014	RNA-RNA Interactions Enable Specific Targeting of Noncoding RNAs to Nascent Pre-mRNAs and Chromatin Sites	10.1016/j.cell.2014.08.018	GSM1348376; GSM1348377	GSE55914	default	PAIRED	mm10 p6
96	One-to-all	RAP	U1 RNAs	multi-copy	None	102420	3537119 (33.9%)	pSM33 ES	embryonic stem cells	treatment: flavopiridol (a transcription inhibitor) for 1 hour	Mus musculus	None	U1	U1 RNAs	None	disuccinimidyl glutarate & formaldehyde	2014	RNA-RNA Interactions Enable Specific Targeting of Noncoding RNAs to Nascent Pre-mRNAs and Chromatin Sites	10.1016/j.cell.2014.08.018	GSM1348370; GSM1348372	GSE55914	default	PAIRED	mm10 p6
95	One-to-all	RAP	U1 RNAs	multi-copy	None	83700	3658339 (36.4%)	pSM33 ES	embryonic stem cells	treatment: DMSO (control)	Mus musculus	None	U1	U1 RNAs	None	disuccinimidyl glutarate & formaldehyde	2014	RNA-RNA Interactions Enable Specific Targeting of Noncoding RNAs to Nascent Pre-mRNAs and Chromatin Sites	10.1016/j.cell.2014.08.018	GSM1348371; GSM1348373	GSE55914	default	PAIRED	mm10 p6
94	One-to-all	RAP	Malat1	lincRNA	None	15962	654261 (4.6%)	V6.5 ES	embryonic stem cells	None	Mus musculus	Malat1	Malat1	Neat2	Metastasis Associated Lung Adenocarcinoma Transcript 1	disuccinimidyl glutarate & formaldehyde	2014	RNA-RNA Interactions Enable Specific Targeting of Noncoding RNAs to Nascent Pre-mRNAs and Chromatin Sites	10.1016/j.cell.2014.08.018	GSM1348347; GSM1348346	GSE55914	default	PAIRED	mm10 p6
93	One-to-all	RAP	Malat1	lincRNA	None	20171	324199 (5.5%)	pSM33 ES	embryonic stem cells	treatment: flavopiridol (a transcription inhibitor) for 1 hour	Mus musculus	Malat1	Malat1	Neat2	Metastasis Associated Lung Adenocarcinoma Transcript 1	disuccinimidyl glutarate & formaldehyde	2014	RNA-RNA Interactions Enable Specific Targeting of Noncoding RNAs to Nascent Pre-mRNAs and Chromatin Sites	10.1016/j.cell.2014.08.018	GSM1348366; GSM1348368	GSE55914	default	PAIRED	mm10 p6
92	One-to-all	RAP	Malat1	lincRNA	None	18985	501052 (8.2%)	pSM33 ES	embryonic stem cells	treatment: DMSO (control with respect to flavopiridol treatment) for 1 hour	Mus musculus	Malat1	Malat1	Neat2	Metastasis Associated Lung Adenocarcinoma Transcript 1	disuccinimidyl glutarate & formaldehyde	2014	RNA-RNA Interactions Enable Specific Targeting of Noncoding RNAs to Nascent Pre-mRNAs and Chromatin Sites	10.1016/j.cell.2014.08.018	GSM1348367; GSM1348369	GSE55914	default	PAIRED	mm10 p6
91	One-to-all	ChIRP	SMIM10L2A	protein coding	1698	130707	8188476 (19.8%)	MCF-7	breast cancer	None	Homo sapiens	SMIM10L2A	LED	LINC00086	Small Integral Membrane Protein 10 Like 2A; LncRNA activator of Enhancer Domains	glutaraldehyde	2015	Genome-wide profiling of p53-regulated enhancer RNAs uncovers a subset of enhancers controlled by a lncRNA	10.1038/ncomms7520	GSM1294974; GSM1294973; GSM1294975	GSE53499	default	SINGLE	hg38 p13
90	One-to-all	CHART	Paupar	lincRNA	2849	68833	5072295 (8.5%)	N2A	neuroblastoma	None	Mus musculus	Paupar	Paupar	None	Pax6 Upstream Antisense RNA	formaldehyde	2014	The long non-coding RNA Paupar regulates the expression of both local and distal genes	10.1002/embj.201386225	GSM1269959; GSM1269957; GSM1269958	GSE52571	default	PAIRED	mm10 p6
89	One-to-all	CHART	Xist	lincRNA	None	25715	857302 (3.0%)	immortalized MEFs	immortalized mouse embryonic fibroblasts	capture oligos: C-11	Mus musculus	Xist	Xist	None	inactive X specific transcripts	formaldehyde	2013	High-resolution Xist binding maps reveal two-step spreading during X-chromosome inactivation	10.1038/nature12719	GSM1182875; GSM1182877	GSE48649	some GSMs; due to their low quality; were trimmed with other parameters: SLIDINGWINDOW:5:22 LEADING:22 MINLEN:14	PAIRED	mm10 p6
88	One-to-all	CHART	Xist	lincRNA	None	9911	237534 (1.1%)	immortalized MEFs	immortalized mouse embryonic fibroblasts	24 hr post tranfection of LNA-C1 (locked nucleic acids); capture oligos: C-11	Mus musculus	Xist	Xist	None	inactive X specific transcripts	formaldehyde	2013	High-resolution Xist binding maps reveal two-step spreading during X-chromosome inactivation	10.1038/nature12719	GSM1182882; GSM1182877	GSE48649	default	PAIRED	mm10 p6
87	One-to-all	CHART	Xist	lincRNA	None	24127	681804 (2.5%)	immortalized MEFs	immortalized mouse embryonic fibroblasts	8 hr post tranfection of LNA-C1 (locked nucleic acids); capture oligos: C-11	Mus musculus	Xist	Xist	None	inactive X specific transcripts	formaldehyde	2013	High-resolution Xist binding maps reveal two-step spreading during X-chromosome inactivation	10.1038/nature12719	GSM1182881; GSM1182877	GSE48649	default	PAIRED	mm10 p6
86	One-to-all	CHART	Xist	lincRNA	None	649	29244 (0.1%)	immortalized MEFs	immortalized mouse embryonic fibroblasts	1 hr post tranfection of LNA-C1 (locked nucleic acids); capture oligos: C-11	Mus musculus	Xist	Xist	None	inactive X specific transcripts	formaldehyde	2013	High-resolution Xist binding maps reveal two-step spreading during X-chromosome inactivation	10.1038/nature12719	GSM1182878; GSM1182877	GSE48649	default	PAIRED	mm10 p6
85	One-to-all	CHART	Xist	lincRNA	None	64709	2569283 (7.8%)	immortalized MEFs	immortalized mouse embryonic fibroblasts	capture oligos: C-40	Mus musculus	Xist	Xist	None	inactive X specific transcripts	formaldehyde	2013	High-resolution Xist binding maps reveal two-step spreading during X-chromosome inactivation	10.1038/nature12719	GSM1182876; GSM1182877	GSE48649	default	PAIRED	mm10 p6
84	One-to-all	CHART	Xist	lincRNA	None	101289	3128175 (11.3%)	immortalized MEFs	immortalized mouse embryonic fibroblasts	1 hr post tranfection of LNA-4978 (locked nucleic acids); capture oligos: C-11	Mus musculus	Xist	Xist	None	inactive X specific transcripts	formaldehyde	2013	High-resolution Xist binding maps reveal two-step spreading during X-chromosome inactivation	10.1038/nature12719	GSM1182883; GSM1182877	GSE48649	default	PAIRED	mm10 p6
83	One-to-all	RAP	Xist	lincRNA	None	33580	1292486 (34.5%)	delXF6 ES	male embryonic stem cells	induction time: 3 hours doxycycline; Xist cDNA with the A-repeat from a Tet-inducible transgene incorporated at the Hprt locus	Mus musculus	Xist	Xist	None	inactive X specific transcripts	formaldehyde	2013	The Xist lncRNA exploits three-dimensional genome architecture to spread across the X chromosome	10.1126/science.1237973	GSM1141184; GSM1141182	GSE46918	default	PAIRED	mm10 p6
82	One-to-all	RAP	Xist	lincRNA	None	37740	232882 (29.8%)	delSXC9 ES	male embryonic stem cells	induction time: 3 hours doxycycline; Xist cDNA without the A-repeat from a Tet-inducible transgene incorporated at the Hprt locus	Mus musculus	Xist	Xist	None	inactive X specific transcripts	formaldehyde	2013	The Xist lncRNA exploits three-dimensional genome architecture to spread across the X chromosome	10.1126/science.1237973	GSM1141185; GSM1141183	GSE46918	default	PAIRED	mm10 p6
81	One-to-all	RAP	Xist	lincRNA	None	4703	32819 (2.5%)	pSM33 ES	male embryonic stem cells	induction XIST time: 0 hours doxycycline	Mus musculus	Xist	Xist	None	inactive X specific transcripts	formaldehyde	2013	The Xist lncRNA exploits three-dimensional genome architecture to spread across the X chromosome	10.1126/science.1237973	GSM1141189; GSM1141186	GSE46918	some GSMs; due to their low quality; were trimmed with other parameters: SLIDINGWINDOW:5:22 LEADING:22 MINLEN:14	PAIRED	mm10 p6
80	One-to-all	RAP	Xist	lincRNA	None	76760	746545 (60.4%)	MLF	female mouse lung fibroblast	None	Mus musculus	Xist	Xist	None	inactive X specific transcripts	formaldehyde	2013	The Xist lncRNA exploits three-dimensional genome architecture to spread across the X chromosome	10.1126/science.1237973	GSM1141179; GSM1141181	GSE46918	default	PAIRED	mm10 p6
79	One-to-all	RAP	Xist	lincRNA	None	30898	385955 (24.7%)	F1 2-1 ES	female embryonic stem cells	induction XIST time: 6 hours (retinoic acid)	Mus musculus	Xist	Xist	None	inactive X specific transcripts	formaldehyde	2013	The Xist lncRNA exploits three-dimensional genome architecture to spread across the X chromosome	10.1126/science.1237973	GSM1141194; GSM1141199	GSE46918	some GSMs; due to their low quality; were trimmed with other parameters: SLIDINGWINDOW:5:22 LEADING:22 MINLEN:14	PAIRED	mm10 p6
78	One-to-all	RAP	Xist	lincRNA	None	33211	99427 (21.5%)	F1 2-1 ES	female embryonic stem cells	induction XIST time: 48 hours (retinoic acid)	Mus musculus	Xist	Xist	None	inactive X specific transcripts	formaldehyde	2013	The Xist lncRNA exploits three-dimensional genome architecture to spread across the X chromosome	10.1126/science.1237973	GSM1141196; GSM1141201	GSE46918	some GSMs; due to their low quality; were trimmed with other parameters: SLIDINGWINDOW:5:22 LEADING:22 MINLEN:14	PAIRED	mm10 p6
77	One-to-all	RAP	Xist	lincRNA	None	28624	325638 (17.8%)	F1 2-1 ES	female embryonic stem cells	induction XIST time: 3 hours (retinoic acid)	Mus musculus	Xist	Xist	None	inactive X specific transcripts	formaldehyde	2013	The Xist lncRNA exploits three-dimensional genome architecture to spread across the X chromosome	10.1126/science.1237973	GSM1141193; GSM1141198	GSE46918	some GSMs; due to their low quality; were trimmed with other parameters: SLIDINGWINDOW:5:22 LEADING:22 MINLEN:14	PAIRED	mm10 p6
76	One-to-all	RAP	Xist	lincRNA	None	20925	290763 (12.7%)	F1 2-1 ES	female embryonic stem cells	induction XIST time: 24 hours (retinoic acid)	Mus musculus	Xist	Xist	None	inactive X specific transcripts	formaldehyde	2013	The Xist lncRNA exploits three-dimensional genome architecture to spread across the X chromosome	10.1126/science.1237973	GSM1141195; GSM1141200	GSE46918	some GSMs; due to their low quality; were trimmed with other parameters: SLIDINGWINDOW:5:22 LEADING:22 MINLEN:14	PAIRED	mm10 p6
75	One-to-all	RAP	Xist	lincRNA	None	59656	871207 (32.5%)	pSM33 ES	male embryonic stem cells	the 1hr Wash time point represents cells that are induced for 1 hour with doxycycline; then washed and grown for 1 hour without doxycycline (induction time: 1 hour and 1 hour wash-out)	Mus musculus	Xist	Xist	None	inactive X specific transcripts	formaldehyde	2013	The Xist lncRNA exploits three-dimensional genome architecture to spread across the X chromosome	10.1126/science.1237973	GSM1141188; GSM1141191	GSE46918	default	PAIRED	mm10 p6
74	One-to-all	RAP	Xist	lincRNA	None	10564	143234 (11.6%)	pSM33 ES	male embryonic stem cells	the 0hr Wash time point represents the same conditions as the TetO Xist time course 1hr time point (induction time: 1 hour doxycycline)	Mus musculus	Xist	Xist	None	inactive X specific transcripts	formaldehyde	2013	The Xist lncRNA exploits three-dimensional genome architecture to spread across the X chromosome	10.1126/science.1237973	GSM1141190; GSM1141187	GSE46918	some GSMs; due to their low quality; were trimmed with other parameters: SLIDINGWINDOW:5:22 LEADING:22 MINLEN:14	PAIRED	mm10 p6
73	One-to-all	ChIRP	116HG RNAs	multi-copy	8105	83573	2773980 (29.4%)	brain	brain	genotype: wild type	Mus musculus	None	116HG	116HG RNAs	spliced long non-coding RNA host gene	formaldehyde	2013	A Prader-Willi locus lncRNA cloud modulates diurnal genes and energy expenditure	10.1093/hmg/ddt281	GSM1065673; GSM1065671; GSM1065676	GSE43575	default	SINGLE	mm10 p6
72	One-to-all	ChIRP	116HG RNAs	multi-copy	None	40162	1906577 (9.7%)	brain	brain	genotype: Snord116del+/- (mice with an engineered deletion of the Snord116 repeat cluster => lacking 116HG)	Mus musculus	None	116HG	116HG RNAs	spliced long non-coding RNA host gene	formaldehyde	2013	A Prader-Willi locus lncRNA cloud modulates diurnal genes and energy expenditure	10.1093/hmg/ddt281	GSM1065674; GSM1065676	GSE43575	default	SINGLE	mm10 p6
71	One-to-all	ChIRP	HOTAIR	lncRNA	832	130749	4183117 (45.2%)	MDA-MB-231	breast cancer cells overexpressing HOTAIR (which matches the HOTAIR level and phenotypic consequences in metastasis-prone human breast cancers) with EZH2 knocked down	overexpressing human HOTAIR with EZH2 knocked down	Homo sapiens	HOTAIR	HOTAIR	None	HOX Transcript Antisense RNA	glutaraldehyde	2011	Genomic Maps of Long Noncoding RNA Occupancy Reveal Principles of RNA-Chromatin Interactions	10.1016/j.molcel.2011.08.027	GSM823786; GSM820435; GSM820436	GSE31332	default	SINGLE	hg38 p13
70	One-to-all	ChIRP	HOTAIR	lncRNA	832	121744	3728702 (35.9%)	MDA-MB-231	breast cancer cells overexpressing HOTAIR (which matches the HOTAIR level and phenotypic consequences in metastasis-prone human breast cancers)	overexpressing human HOTAIR	Homo sapiens	HOTAIR	HOTAIR	None	HOX Transcript Antisense RNA	glutaraldehyde	2011	Genomic Maps of Long Noncoding RNA Occupancy Reveal Principles of RNA-Chromatin Interactions	10.1016/j.molcel.2011.08.027	GSM820434; GSM820435; GSM820433	GSE31332	default	SINGLE	hg38 p13
69	One-to-all	ChIRP	TERC	lncRNA	2198	253565	11342381 (43.5%)	HeLa S3	cervix carcinoma cells overexpressing human telomerase and TERC	overexpressing human telomerase and TERC	Homo sapiens	TERC	TERC	None	Telomerase RNA Component	glutaraldehyde	2011	Genomic Maps of Long Noncoding RNA Occupancy Reveal Principles of RNA-Chromatin Interactions	10.1016/j.molcel.2011.08.027	GSM820430; GSM820431; GSM820432	GSE31332	default	SINGLE	hg38 p13
68	One-to-all	ChIRP	TERC	lncRNA	2198	280243	15720012 (56.8%)	HeLa S3	cervix carcinoma cells	None	Homo sapiens	TERC	TERC	None	Telomerase RNA Component	glutaraldehyde	2011	Genomic Maps of Long Noncoding RNA Occupancy Reveal Principles of RNA-Chromatin Interactions	10.1016/j.molcel.2011.08.027	GSM820432; GSM820438; GSM820437	GSE31332	default	SINGLE	hg38 p13
67	One-to-all	ChIRP	LINC02085	lncRNA	236	1543	70162 (0.3%)	IMR90	lung fibroblast	treatment: TNF (tumor necrosis factor activates expression of NFΚBMARL-1)	Homo sapiens	LINC02085	NFKBMARL-1	None	Long Intergenic Non-Protein Coding RNA 2085	disuccinimidyl glutarate & formaldehyde	2021	Aging-associated lncRNAs are evolutionarily conserved and participate in NFκB signaling	10.1038/s43587-021-00056-0	GSM5106465; GSM5106463; GSM5106470	GSE167511	default	PAIRED	hg38 p13
66	One-to-all	ChIRP	LINC02085	lncRNA	None	48454	437412 (4.8%)	IMR90	lung fibroblast	treatment: Bleomycin (senescence inducer activates expression of NFΚBMARL-1)	Homo sapiens	LINC02085	NFKBMARL-1	None	Long Intergenic Non-Protein Coding RNA 2085	disuccinimidyl glutarate & formaldehyde	2021	Aging-associated lncRNAs are evolutionarily conserved and participate in NFκB signaling	10.1038/s43587-021-00056-0	GSM5106469; GSM5106470; GSM5106467	GSE167511	default	PAIRED	hg38 p13
65	One-to-all	ChIRP	CDKN2B-AS1	lncRNA	3227	5774	368184 (0.4%)	HEK293	human embryonic kidney cells	None	Homo sapiens	CDKN2B-AS1	ANRIL	None	CDKN2B Antisense RNA 1; Antisense noncoding RNA in the INK4 locus	formaldehyde	2021	Implication of repeat insertion domains in the trans-activity of the long non-coding RNA ANRIL	10.1093/nar/gkab245	GSM4947072; GSM4947065; GSM4947063; GSM4947064; GSM4947066; GSM4947071	GSE162224	default	PAIRED	hg38 p13
64	One-to-all	ChIRP	LncMyoD	lincRNA	None	222860	45701602 (70.3%)	myotubes	differentiated myotubes	None	Mus musculus	None	LncMyoD	None	None	glutaraldehyde	2020	A long noncoding RNA; LncMyoD; modulates chromatin accessibility to regulate muscle stem cell myogenic lineage progression	10.1073/pnas.2005868117	GSM4819904; GSM4819900; GSM4819901; GSM4819902; GSM4819899; GSM4819903	GSE159132	default	SINGLE	mm10 p6
63	One-to-all	ChIRP	CPEB2-DT	lncRNA	152	1191	40452 (0.1%)	THP-1	THP-1 monocytes (TIB-202 ATCC)	None	Homo sapiens	CPEB2-DT	DRAIR	CPEB2-AS1	CPEB2 Divergent Transcript; Diabetes regulated antiinflammatory RNA	glutaraldehyde	2021	lncRNA DRAIR is downregulated in diabetic monocytes and modulates the inflammatory phenotype via epigenetic mechanisms	10.1172/jci.insight.143289	GSM4725014; GSM4725015; GSM4725013; GSM4725012	GSE156122	default	SINGLE	hg38 p13
62	One-to-all	ChIRP	SRA1	protein coding	2790	76	3022 (0.0%)	K562	female chronic myelogenous leukemia cell line	None	Homo sapiens	SRA1	SRA	NR_045587.1	Steroid Receptor RNA Activator 1	glutaraldehyde	2020	Genome-Wide Transcriptional Regulation of the Long Non-coding RNA Steroid Receptor RNA Activator in Human Erythroblasts	10.3389/fgene.2020.00850	GSM4632919; GSM4632920; GSM4632922; GSM4632923; GSM4632921; GSM4632924	GSE153004	default	SINGLE	hg38 p13
61	One-to-all	ChIRP	Smim31	protein coding	23382	14448	156505 (27.7%)	NMuMG	mammary gland cells	NMuMG mammary gland cells overexpressing EPR	Mus musculus	Smim31	EPR	BC030870	Small integral membrane protein 31; Epithelial Program Regulator	glutaraldehyde	2020	Comprehensive multi-omics analysis uncovers a group of TGF-β-regulated genes among lncRNA EPR direct transcriptional targets	10.1093/nar/gkaa628	GSM4420347; GSM4420345; GSM4420346	GSE147208	default	PAIRED	mm10 p6
60	One-to-all	ChIRP	7SK RNAs	multi-copy	None	160022	11386956 (46.0%)	HAP1	Unknown	genotype: wild-type; treatment: UV- (control)	Homo sapiens	None	7SK	7SK RNAs	None	glutaraldehyde	2021	The 7SK/P-TEFb snRNP controls ultraviolet radiation-induced transcriptional reprogramming	10.1016/j.celrep.2021.108965	GSM4413747; GSM4413742; GSM4413741; GSM4413749	GSE147055	default	PAIRED	hg38 p13
59	One-to-all	ChIRP	7SK RNAs	multi-copy	None	185947	10995101 (53.9%)	HAP1	Unknown	genotype: wild-type; treatment: 1h UV light (under UV-induced stress conditions & human cells lacking the 7SK/P-TEFb regulatory snRNP show compromised transcriptional response and reduced cell viability)	Homo sapiens	None	7SK	7SK RNAs	None	glutaraldehyde	2021	The 7SK/P-TEFb snRNP controls ultraviolet radiation-induced transcriptional reprogramming	10.1016/j.celrep.2021.108965	GSM4413741; GSM4413742; GSM4413750; GSM4413748	GSE147055	default	PAIRED	hg38 p13
58	One-to-all	ChIRP	Malat1	lincRNA	None	28548	441400 (3.0%)	mES	embryonic stem cells	genotype: Ythdc1-cKO (conditional); treatment: DMSO (control)	Mus musculus	Malat1	Malat1	Neat2	Metastasis Associated Lung Adenocarcinoma Transcript 1	formaldehyde	2021	The RNA m6A reader YTHDC1 silences retrotransposons and guards ES cell identity	10.1038/s41586-021-03313-9	GSM4669092; GSM4669091; GSM4669086	GSE146467	default	PAIRED	mm10 p6
57	One-to-all	ChIRP	LINE1 RNAs	multi-copy	None	16866	432109 (2.6%)	mES	embryonic stem cells	genotype: Ythdc1-cKO (conditional); treatment: DMSO (control)	Mus musculus	None	LINE1	LINE1 RNAs	L1 or LINE-1	formaldehyde	2021	The RNA m6A reader YTHDC1 silences retrotransposons and guards ES cell identity	10.1038/s41586-021-03313-9	GSM4669088; GSM4669087; GSM4669086	GSE146467	default	PAIRED	mm10 p6
56	One-to-all	ChIRP	IAP RNAs	multi-copy	None	19035	339562 (2.2%)	mES	embryonic stem cells	genotype: Ythdc1-cKO (conditional); treatment: DMSO (control)	Mus musculus	None	IAP	IAP RNAs	intracisternal A-type particle	formaldehyde	2021	The RNA m6A reader YTHDC1 silences retrotransposons and guards ES cell identity	10.1038/s41586-021-03313-9	GSM4669086; GSM4669085; GSM4669084	GSE146467	default	PAIRED	mm10 p6
55	One-to-all	ChIRP	Malat1	lincRNA	None	61546	890097 (5.9%)	mES	embryonic stem cells	genotype: Ythdc1-cKO (conditional); treatment: 4OHT	Mus musculus	Malat1	Malat1	Neat2	Metastasis Associated Lung Adenocarcinoma Transcript 1	formaldehyde	2021	The RNA m6A reader YTHDC1 silences retrotransposons and guards ES cell identity	10.1038/s41586-021-03313-9	GSM4875664; GSM4875657; GSM4875665	GSE146467	default	PAIRED	mm10 p6
54	One-to-all	ChIRP	LINE1 RNAs	multi-copy	None	133901	1882626 (14.8%)	mES	embryonic stem cells	genotype: Ythdc1-cKO (conditional); treatment: 4OHT	Mus musculus	None	LINE1	LINE1 RNAs	L1 or LINE-1	formaldehyde	2021	The RNA m6A reader YTHDC1 silences retrotransposons and guards ES cell identity	10.1038/s41586-021-03313-9	GSM4875661; GSM4875657; GSM4875660	GSE146467	default	PAIRED	mm10 p6
53	One-to-all	ChIRP	IAP RNAs	multi-copy	None	36334	457976 (3.6%)	mES	embryonic stem cells	genotype: Ythdc1-cKO (conditional); treatment: 4OHT	Mus musculus	None	IAP	IAP RNAs	intracisternal A-type particle	formaldehyde	2021	The RNA m6A reader YTHDC1 silences retrotransposons and guards ES cell identity	10.1038/s41586-021-03313-9	GSM4875659; GSM4875658; GSM4875657	GSE146467	default	PAIRED	mm10 p6
52	One-to-all	ChIRP	Malat1	lincRNA	None	963	40840 (0.2%)	mES	embryonic stem cells	genotype: Mettl3-WT	Mus musculus	Malat1	Malat1	Neat2	Metastasis Associated Lung Adenocarcinoma Transcript 1	formaldehyde	2021	The RNA m6A reader YTHDC1 silences retrotransposons and guards ES cell identity	10.1038/s41586-021-03313-9	GSM4875648; GSM4875651; GSM4875652	GSE146467	default	PAIRED	mm10 p6
51	One-to-all	ChIRP	LINE1 RNAs	multi-copy	None	65	30105 (0.0%)	mES	embryonic stem cells	genotype: Mettl3-WT	Mus musculus	None	LINE1	LINE1 RNAs	L1 or LINE-1	formaldehyde	2021	The RNA m6A reader YTHDC1 silences retrotransposons and guards ES cell identity	10.1038/s41586-021-03313-9	GSM4875648; GSM4875656; GSM4875655	GSE146467	default	PAIRED	mm10 p6
50	One-to-all	ChIRP	IAP RNAs	multi-copy	None	1178	47457 (0.2%)	mES	embryonic stem cells	genotype: Mettl3-WT	Mus musculus	None	IAP	IAP RNAs	intracisternal A-type particle	formaldehyde	2021	The RNA m6A reader YTHDC1 silences retrotransposons and guards ES cell identity	10.1038/s41586-021-03313-9	GSM4875646; GSM4875647; GSM4875648	GSE146467	default	PAIRED	mm10 p6
49	One-to-all	ChIRP	Malat1	lincRNA	None	555	25214 (0.1%)	mES	embryonic stem cells	genotype: Mettl3-KO	Mus musculus	Malat1	Malat1	Neat2	Metastasis Associated Lung Adenocarcinoma Transcript 1	formaldehyde	2021	The RNA m6A reader YTHDC1 silences retrotransposons and guards ES cell identity	10.1038/s41586-021-03313-9	GSM4875641; GSM4875644; GSM4875645	GSE146467	default	PAIRED	mm10 p6
48	One-to-all	ChIRP	LINE1 RNAs	multi-copy	None	51	31625 (0.0%)	mES	embryonic stem cells	genotype: Mettl3-KO	Mus musculus	None	LINE1	LINE1 RNAs	L1 or LINE-1	formaldehyde	2021	The RNA m6A reader YTHDC1 silences retrotransposons and guards ES cell identity	10.1038/s41586-021-03313-9	GSM4875654; GSM4875641; GSM4875653	GSE146467	default	PAIRED	mm10 p6
47	One-to-all	ChIRP	IAP RNAs	multi-copy	None	2636	77165 (0.4%)	mES	embryonic stem cells	genotype: Mettl3-KO	Mus musculus	None	IAP	IAP RNAs	intracisternal A-type particle	formaldehyde	2021	The RNA m6A reader YTHDC1 silences retrotransposons and guards ES cell identity	10.1038/s41586-021-03313-9	GSM4875639; GSM4875641; GSM4875640	GSE146467	default	PAIRED	mm10 p6
46	One-to-all	CHART	Xist	lincRNA	None	188	15833 (0.0%)	WAPL-FKBP(degron) female line	ES cell (Tsix-stop)	treatment: 3 days dTAG-13 (recruits an endogenous E3 ubiquitin ligase to degrade WAPL protein); differentiation day: 7; WAPL: cohesin release factor	Mus musculus	Xist	Xist	None	inactive X specific transcripts	formaldehyde	2021	Balancing cohesin eviction and retention prevents aberrant chromosomal interactions; Polycomb-mediated repression; and X-inactivation	10.1016/j.molcel.2021.02.031	GSM4299028; GSM4299030; GSM4299032; GSM4299026	GSE144834	default	PAIRED	mm10 p6
45	One-to-all	CHART	Xist	lincRNA	None	82	8256 (0.0%)	WAPL-FKBP(degron) female line	ES cell (Tsix-stop)	treatment: 3 days DMSO (control with respect to dTAG-13 treatment); differentiation day: 7; WAPL: cohesin release factor	Mus musculus	Xist	Xist	None	inactive X specific transcripts	formaldehyde	2021	Balancing cohesin eviction and retention prevents aberrant chromosomal interactions; Polycomb-mediated repression; and X-inactivation	10.1016/j.molcel.2021.02.031	GSM4299029; GSM4299031; GSM4299027; GSM4299025	GSE144834	default	PAIRED	mm10 p6
44	One-to-all	ChIRP	1200007C13Rik	lincRNA	65535 but it is not exactly	107330	5722666 (65.3%)	primary NDL	Mammary tumor	None	Mus musculus	1200007C13Rik	MaTAR25	None	RIKEN cDNA 1200007C13 gene; Mammary Tumor Associated RNA 25	glutaraldehyde	2020	MaTAR25 lncRNA regulates the Tensin1 gene to impact breast cancer progression	10.1038/s41467-020-20207-y	GSM4226233; GSM4226231; GSM4226234; GSM4226230	GSE142169	default	PAIRED	mm10 p6
43	One-to-all	ChIRP	1200007C13Rik	lincRNA	65535 but it is not exactly	93421	5437245 (67.7%)	4T1	Mammary tumor	total oligo probe set	Mus musculus	1200007C13Rik	MaTAR25	None	RIKEN cDNA 1200007C13 gene; Mammary Tumor Associated RNA 25	glutaraldehyde	2020	MaTAR25 lncRNA regulates the Tensin1 gene to impact breast cancer progression	10.1038/s41467-020-20207-y	GSM4226221; GSM4226220; GSM4226219; GSM4226218	GSE142169	default	PAIRED	mm10 p6
42	One-to-all	ChIRP	1200007C13Rik	lincRNA	65535 but it is not exactly	143535	9747682 (60.5%)	4T1	Mammary tumor	odd & even sets of oligo probes	Mus musculus	1200007C13Rik	MaTAR25	None	RIKEN cDNA 1200007C13 gene; Mammary Tumor Associated RNA 25	glutaraldehyde	2020	MaTAR25 lncRNA regulates the Tensin1 gene to impact breast cancer progression	10.1038/s41467-020-20207-y	GSM4226225; GSM4226220; GSM4226221; GSM4226222; GSM4226224; GSM4226226; GSM4226227; GSM4226228	GSE142169	default	PAIRED	mm10 p6
41	One-to-all	RAP	Xist	lincRNA	None	28500	137616 (21.4%)	T20 ES	male embryonic stem cells	tet-inducible Xist cDNA transgenes inserted into the Hprt locus in male ES cells (deleting the E-repeat ~4122 nucleotide)	Mus musculus	Xist	Xist	None	inactive X specific transcripts	formaldehyde	2020	A protein assembly mediates Xist localization and gene silencing	10.1038/s41586-020-2703-0	GSM4520650; GSM1141184	GSE137305	default	PAIRED	mm10 p6
40	One-to-all	RAP	Xist	lincRNA	None	16813	184977 (15.2%)	T20 ES	male embryonic stem cells	tet-inducible Xist cDNA transgenes inserted into the Hprt locus in male ES cells (with a 1237 nucleotide deletion ending at a similar region with Xist and not including the E-repeat)	Mus musculus	Xist	Xist	None	inactive X specific transcripts	formaldehyde	2020	A protein assembly mediates Xist localization and gene silencing	10.1038/s41586-020-2703-0	GSM4520649; GSM1141184	GSE137305	default	PAIRED	mm10 p6
39	One-to-all	CHART	AL109615.3	lncRNA	15999	40765	2272120 (3.0%)	MDA-MB-231	16h MDA-MB-231 sphere-derived cells	None	Homo sapiens	AL109615.3	SCIRT	RP5-1120P11.1; LOC101929705	Stem Cell Inhibitory RNA Transcript	formaldehyde	2020	SCIRT lncRNA Restrains Tumorigenesis by Opposing Transcriptional Programs of Tumor-Initiating Cells	10.1158/0008-5472.CAN-20-2612	GSM4042216; GSM4042212; GSM4042215	GSE136195	default	SINGLE	hg38 p13
38	One-to-all	ChIRP	IAPEz-int RNAs	multi-copy	None	16900	796889 (9.4%)	ES	embryonic stem cells	None	Mus musculus	None	IAPEz-int	IAPEz-int RNAs	None	formaldehyde	2021	METTL3 regulates heterochromatin in mouse embryonic stem cells	10.1038/s41586-021-03210-1	GSM4664577; GSM4664578; GSM4307085; GSM4307084	GSE126243	default	PAIRED	mm10 p6
37	One-to-all	ChIRP	HAND2-AS1	lncRNA	18938	133538	12901712 (51.6%)	liver CSCs	HCC liver CSCs (CD13+ and CD133+) cells	None	Homo sapiens	HAND2-AS1	HAND2-AS1	ENSG00000237125	HAND2 Antisense RNA 1	glutaraldehyde	2019	LncRNA HAND2‐AS1 promotes liver cancer stem cell self‐renewal via BMP signaling	10.15252/embj.2018101110	GSM3591876; GSM3591874; GSM3591875; GSM3591878; GSM3591877; GSM3591879	GSE126123	default	PAIRED	hg38 p13
36	One-to-all	ChIRP	Malat1	lincRNA	None	244	40532 (0.4%)	E14 ES	embryonic stem cells	None	Mus musculus	Malat1	Malat1	Neat2	Metastasis Associated Lung Adenocarcinoma Transcript 1	dithiobis succinimidyl propionate & formaldehyde	2020	Genomic Repeats Categorize Genes with Distinct Functions for Orchestrated Regulation	10.1016/j.celrep.2020.02.048	GSM3581641; GSM3581640	GSE125766	default	PAIRED	mm10 p6
35	One-to-all	ChIRP	LINE1 RNAs	multi-copy	24666	65090	3198605 (15.0%)	E14 ES	embryonic stem cells	None	Mus musculus	None	LINE1	LINE1 RNAs	L1 or LINE-1	dithiobis succinimidyl propionate & formaldehyde	2020	Genomic Repeats Categorize Genes with Distinct Functions for Orchestrated Regulation	10.1016/j.celrep.2020.02.048	GSM3581641; GSM3581639	GSE125766	default	PAIRED	mm10 p6
34	One-to-all	CHIRT	TERRA RNAs	multi-copy	10670	216452	5592905 (30.9%)	p53-/- iPS	2i-grown Trp53 (also known as p53)-null iPS cells	p53-/- genotype	Mus musculus	None	TERRA	TERRA RNAs	telomeric repeat-containing RNAs	glutaraldehyde	2019	TERRA regulate the transcriptional landscape of pluripotent cells through TRF1-dependent recruitment of PRC2	10.7554/eLife.44656	GSM3445731; GSM3445730	GSE121759	some GSMs; due to their low quality; were trimmed with other parameters: SLIDINGWINDOW:5:22 LEADING:22 MINLEN:14	SINGLE	mm10 p6
33	One-to-all	ChIRP	A830082K12Rik	antisense	None	64186	2137113 (14.8%)	NPC	mouse neuronal precursor cells	None	Mus musculus	A830082K12Rik	lnc-Nr2f1	None	NR2F1 Antisense RNA 1	formaldehyde	2019	PIRCh-seq: functional classification of non-coding RNAs associated with distinct histone modifications	10.1186/s13059-019-1880-3	GSM3717638; GSM3717640; GSM3717639	GSE119006	default	SINGLE	mm10 p6
32	One-to-all	ChIRP	Ttc39aos1	antisense	None	71	31722 (0.0%)	BMDM (Bone-marrow derived macrophages)	Primary macrophage cells	None	Mus musculus	Ttc39aos1	lincRNA-EPS	None	Ttc39a opposite strand RNA 1	glutaraldehyde	2019	HiChIRP reveals RNA-associated chromosome conformation	10.1038/s41592-019-0407-x	GSM3181442; GSM3181441; GSM3181444; GSM3181443	GSE115524	default	PAIRED	mm10 p6
31	One-to-all	ChIRP	A830082K12Rik	antisense	14975	59415	8001306 (18.6%)	mES	embryonic stem cell derived induced neurons (day 4)	None	Mus musculus	A830082K12Rik	lnc-Nr2f1	None	NR2F1 Antisense RNA 1	formaldehyde	2019	The novel lncRNA lnc-NR2F1 is pro-neurogenic and mutated in human neurodevelopmental disorders	10.7554/eLife.41770	GSM3164833; GSM3164829; GSM3164832; GSM3164828; GSM3164836	GSE115079	default	SINGLE	mm10 p6
30	One-to-all	ChIRP	FLJ42969	lncRNA	487	206165	36249487 (51.8%)	Jurkat	Unknown	None	Homo sapiens	FLJ42969	SLEAR	None	Uncharacterized LOC441374; SLE-associated RNA	glutaraldehyde	2020	Association of the Polymorphism rs13259960 in SLEAR With Predisposition to Systemic Lupus Erythematosus	10.1002/art.41200	GSM2801162; GSM2801165; GSM2801166; GSM2801169; GSM2801164; GSM2801161; GSM2801168; GSM2801158; GSM2801160	GSE104480	default	PAIRED	hg38 p13
