# Supplementary material for: RNA-Chrom: a manually curated analytical database of RNA–chromatin interactome
Source: Database (Oxford). 2023 Apr 24;2023:baad025. doi: 10.1093/database/baad025 (PMC10205464; doi:10.1093/database/baad025)
Supplement: baad025_Supp [file baad025_supp.zip › baad025_Supp/Supplementary-table-3.xlsx]

## Sheet: Table 3
Supplementary Table 3. 28 data sets that have been re-trimmed with a more permissive ”quality threshold” of 22 and an additional LEADING:22 parameter.
GSE ID — the NCBI GEO accession number for RNA-chromatin data.
GSE ID	GSM ID	SRR ID
GSE46918	GSM1141165	SRR850618
GSE46918	GSM1141166	SRR850619
GSE46918	GSM1141170	SRR850623
GSE46918	GSM1141171	SRR850624
GSE46918	GSM1141180	SRR850633
GSE46918	GSM1141189	SRR850642
GSE46918	GSM1141190	SRR850643
GSE46918	GSM1141192	SRR850645
GSE46918	GSM1141193	SRR850646
GSE46918	GSM1141194	SRR850647
GSE46918	GSM1141195	SRR850648
GSE46918	GSM1141196	SRR850649
GSE46918	GSM1141197	SRR850650
GSE46918	GSM1141198	SRR850651
GSE46918	GSM1141199	SRR850652
GSE46918	GSM1141200	SRR850653
GSE46918	GSM1141201	SRR850654
GSE48649	GSM1182875	SRR927472
GSE48649	GSM1182888	SRR927485
GSE80510	GSM2128918	SRR3407182
GSE80510	GSM2128921	SRR3407187
GSE58641	GSM1415924	SRR1425237
GSE51633	GSM1249900	SRR1016014
GSE51633	GSM1249901	SRR1016015
GSE51633	GSM1249902	SRR1016016
GSE51633	GSM1249903	SRR1016017
GSE51633	GSM1249904	SRR1016018
GSE121759	GSM3445731	SRR8108608
