# Supplementary material for: RNA-Chrom: a manually curated analytical database of RNA–chromatin interactome
Source: Database (Oxford). 2023 Apr 24;2023:baad025. doi: 10.1093/database/baad025 (PMC10205464; doi:10.1093/database/baad025)
Supplement: baad025_Supp [file baad025_supp.zip › baad025_Supp/Supplementary-table-4.xlsx]

## Sheet: Table 4
Supplementary Table 4. Data that are involved in clarifying the orientation of the RNA-parts of human contacts.
Data sets	Number of reads participating in the analysis	Median ribosomal protein-coding genes coverage
imargi_SRR206679	23682	317
imargi_SRR206680	73941	953
margi_SRR5278094	6671	74
margi_SRR5278095	1246	15
margi_SRR5278096	1580	17
margi_SRR5278097	3166	26
margi_SRR5278098	3691	37
margi_SRR5278099	3100	38
margi_SRR5278100	62782	632
margi_SRR5278101	3656	45
margi_SRR5278102	1531	17
margi_SRR5278104	3127	39
margi_SRR5278105	721	8
grid_SRR3633284	71923	908
grid_SRR3633286	71580	891
grid_SRR3633288	64394	687.0
grid_SRR3633290	68753	765.0
redc_SRR10010323	2484	28.0
redc_SRR10010324	205427	1797.0
redc_SRR10010325	87569	1053.0
redc_SRR10010326	21091	180.0
redc_SRR10010328	314345	3454.0
redc_SRR10010330	2857	36.0
imargi_SRR12462453	13820	222.0
imargi_SRR12462454	10470	136.0
imargi_SRR9900120	44049	705.0
imargi_SRR9900121	23886	345.0
imargi_SRR9900122	27872	372.0
